# Supplementary material for: High-Resolution Analysis of Mononuclear Phagocytes Reveals GPNMB as a Prognostic Marker in Human Colorectal Liver Metastasis
Source: Oxford University Press journal article supplement (doi:10.1158/2326-6066.cir-22-0462), 2023-01-18
Supplement: cir-22-0462_supplementary_table_s4_suppst4.xlsx [file cir-22-0462_supplementary_table_s4_suppst4.xlsx]

## Sheet: CellphoneDB results
CellphoneDB interaction analysis results, related to Figure S4
id_cp_interaction	interacting_pair	partner_a	partner_b	gene_a	gene_b	secreted	receptor_a	receptor_b	annotation_strategy	is_integrin	rank	1|1	1|10	1|11	1|12	1|13	1|14	1|15	1|16	1|17	1|18	1|19	1|2	1|4	1|5	1|6	1|7	1|cluster_1	1|cluster_11	1|cluster_2	1|cluster_4	1|cluster_5	10|1	10|10	10|11	10|12	10|13	10|14	10|15	10|16	10|17	10|18	10|19	10|2	10|4	10|5	10|6	10|7	10|cluster_1
CPI-SS0330D939A	FGF17_FGFR2	simple:O60258	simple:P21802	FGF17	FGFR2	True	False	True	I2D,InnateDB-All	False	0.002	1.117
CPI-SS05A94DE17	FGF2_FGFR2	simple:P09038	simple:P21802	FGF2	FGFR2	True	False	True	curated	False	0.005	1.182	0.78
CPI-SS01D785DBA	FGFR2_FGF23	simple:P21802	simple:Q9GZV9	FGFR2	FGF23	True	True	False	I2D,IMEx,InnateDB-All,IntAct	False	0.005	0.759	1.101
CPI-SS0472C478C	BMP7_PTPRK	simple:P18075	simple:Q15262	BMP7	PTPRK	True	False	True	InnateDB-All	False	0.005	0.932	0.136
CPI-SS0AC594A8E	FGF17_FGFR4	simple:O60258	simple:P22455	FGF17	FGFR4	True	False	True	I2D	False	0.007	0.558	1.854	0.587
CPI-SS0CCD89E02	CCL25_ACKR4	simple:O15444	simple:Q9NPB9	CCL25	ACKR4	True	False	True	curated	False	0.007	0.885	0.604	1.151
CPI-SS0609FCF76	RSPO4_LGR6	simple:Q2I0M5	simple:Q9HBX8	RSPO4	LGR6	True	False	True	guidetopharmacology.org	False	0.007	0.628	0.24	0.624
CPI-SS0F6A7A4DF	FGF18_FGFR2	simple:O76093	simple:P21802	FGF18	FGFR2	True	False	True	I2D	False	0.007	0.753	0.709	0.672
CPI-SS0231B999D	GUCY2C_GUCA2B	simple:P25092	simple:Q16661	GUCY2C	GUCA2B	True	True	False	guidetopharmacology.org	False	0.009	0.826	0.809	0.169	0.153
CPI-SC0EFCE145F	OMD_aVb3	complex	simple:Q99983	complex:aVb3	complex	OMD	True	False	False	curated	True	0.009	0.777	0.717	1.015	0.686
CPI-CS0D4BB4458	MIS	receptor	3_AMH	complex:MIS	receptor	3	simple:P03971	AMH	True	True	False	curated	False	0.009	1.379	0.932	0.697	0.25
CPI-CS07557A266	MIS	receptor	1_AMH	complex:MIS	receptor	1	simple:P03971	AMH	True	True	False	curated	False	0.009	1.379	0.932	0.697	0.25
CPI-SS083B5EBAB	CXCL13_ACKR4	simple:O43927	simple:Q9NPB9	CXCL13	ACKR4	True	False	True	curated	False	0.009	0.771	0.756	2.062	0.66
CPI-SC0247375A7	COL17A1_a11b1	complex	simple:Q9UMD9	complex:a11b1	complex	COL17A1	True	False	False	curated	True	0.009	0.955	0.527	1.556	0.544
CPI-SS000568A0E	FCER2_CR2	simple:P06734	simple:P20023	FCER2	CR2	True	True	True	curated	False	0.009	1.531	0.874	0.848	0.191
CPI-SS032E9A219	CX3CR1_CX3CL1	simple:P49238	simple:P78423	CX3CR1	CX3CL1	True	True	True	curated	False	0.009	0.297	0.241	0.909	0.852
CPI-SS00399ED03	AVP_AVPR1A	simple:P01185	simple:P37288	AVP	AVPR1A	True	False	True	I2D,IMEx,IntAct	False	0.009	0.412	0.086	0.411	0.085
CPI-SS0BF3ED143	FGFR2_FGFR3	simple:P21802	simple:P22607	FGFR2	FGFR3	True	True	True	IMEx,InnateDB-All	False	0.011	0.652	1.393	0.702	1.221	0.657
CPI-SS034D3988F	RSPO4_LGR4	simple:Q2I0M5	simple:Q9BXB1	RSPO4	LGR4	True	False	True	guidetopharmacology.org	False	0.011	0.359	0.209	0.433	0.279	0.473
CPI-SS00AEC3818	CCL19_ACKR4	simple:Q99731	simple:Q9NPB9	CCL19	ACKR4	True	False	True	curated	False	0.011	0.654	0.974	0.692	1.324	0.621
CPI-SS0BC9F7E9E	FGF17_FGFR3	simple:O60258	simple:P22607	FGF17	FGFR3	True	False	True	I2D	False	0.011	0.569	1.31	0.619	1.138	0.573
CPI-SS0BE8BE8E9	ACKR2_CCL8	simple:O00590	simple:P80075	ACKR2	CCL8	True	True	False	curated	False	0.014	0.497	1.48	0.566	1.549	0.33	1.312
CPI-SS008FB916C	FGF2_FGFR4	simple:P09038	simple:P22455	FGF2	FGFR4	True	False	True	curated	False	0.014	0.623	1.919	0.652	0.221	1.517	0.25
CPI-CS05EAF93CC	BMPR1A_BMPR2_BMP7	complex:BMPR1A_BMPR2	simple:P18075	BMP7	True	True	False	curated	False	0.014	0.198	0.353	0.275	0.269	0.347	0.605
CPI-SS00A6240B6	WNT1_ROR2	simple:P04628	simple:Q01974	WNT1	ROR2	True	False	True	InnateDB-All	False	0.014	1.225	0.883	1.099	0.445	0.103	0.319
CPI-SS030EDC420	FZD9_WNT7A	simple:O00144	simple:O00755	FZD9	WNT7A	True	True	False	I2D	False	0.014	0.355	0.466	0.361	0.471	0.811	0.921
CPI-SS0193C3064	WNT1_FZD8	simple:P04628	simple:Q9H461	WNT1	FZD8	True	False	True	I2D,InnateDB-All	False	0.014	0.89	0.91	1.451	0.11	0.13	0.671
CPI-SS0097929A7	BMP7_SLAMF1	simple:P18075	simple:Q13291	BMP7	SLAMF1	True	False	True	InnateDB-All	False	0.014	0.512	0.859	0.815	0.292	0.843	0.857
CPI-SS06B0861F1	ACKR2_CCL13	simple:O00590	simple:Q99616	ACKR2	CCL13	True	True	False	curated	False	0.014	0.466	0.908	0.535	0.977	0.298	0.741
CPI-SS04587A7C5	CCL16_HRH4	simple:O15467	simple:Q9H3N8	CCL16	HRH4	True	False	True	guidetopharmacology.org	False	0.014	0.287	0.248	0.248	0.209	0.369	0.33
CPI-CS0123BC66C	PlexinA1_complex2_SEMA6D	complex:PlexinA1_complex2	simple:Q8NFY4	SEMA6D	False	True	False	curated	False	0.014	0.27	0.555	1.137	1.423	0.159	0.444
CPI-SS05C2D0200	FZD9_WNT1	simple:O00144	simple:P04628	FZD9	WNT1	True	True	False	I2D	False	0.014	0.872	0.092	0.878	0.097	1.328	0.547
CPI-SC0A8E69BC5	COL11A2_a1b1	complex	simple:P13942	complex:a1b1	complex	COL11A2	True	False	False	curated	True	0.014	0.822	0.179	0.206	0.855	0.173	0.212
CPI-SS0CCDBBBC0	CEACAM1_CEACAM8	simple:P13688	simple:P31997	CEACAM1	CEACAM8	True	False	False	curated	False	0.014	0.781	0.992	0.87	0.711	0.395	0.196
CPI-SS04861AD1A	FGFR4_SCGB3A1	simple:P22455	simple:Q96QR1	FGFR4	SCGB3A1	True	True	False	IMEx,InnateDB-All,MINT	False	0.014	0.159	0.212	1.455	1.508	0.189	0.241
CPI-SC08AA91C84	COL17A1_a1b1	complex	simple:Q9UMD9	complex:a1b1	complex	COL17A1	True	False	False	curated	True	0.016	0.609	0.57	0.555	0.567	1.257	0.575	0.614
CPI-SC06873D10F	COL17A1_a2b1	complex	simple:Q9UMD9	complex:a2b1	complex	COL17A1	True	False	False	curated	True	0.016	0.651	0.565	0.6	1.166	0.699	0.687	0.606
CPI-SS06A0B20BD	FGFR2_EPHA4	simple:P21802	simple:P54764	FGFR2	EPHA4	True	True	True	I2D,InnateDB-All	False	0.016	0.699	0.657	0.65	0.654	0.718	0.647	1
CPI-SC0D2BDC009	COL13A1_a11b1	complex	simple:Q5TAT6	complex:a11b1	complex	COL13A1	False	False	False	curated	True	0.016	0.539	1.14	0.128	1.088	0.659	1.689	0.676
CPI-SS0AC66088D	CEACAM5_CD1D	simple:P06731	simple:P15813	CEACAM5	CD1D	False	False	False	curated	False	0.016	0.552	0.539	0.816	0.687	0.883	0.742	0.68
CPI-CS09F211C3E	NKG2D	II	receptor_RAET1E	complex:NKG2D	II	receptor	simple:Q8TD07	RAET1E	True	True	False	curated	False	0.016	1.341	1.307	1.215	1.485	1.336	1.555	1.167
CPI-SS0F3BF2B34	CCL5_ACKR4	simple:P13501	simple:Q9NPB9	CCL5	ACKR4	True	False	True	I2D	False	0.016	2.589	1.712	1.927	2.712	1.272	2.008	2.105
CPI-SC06B4C6DD5	COL17A1_a10b1	complex	simple:Q9UMD9	complex:a10b1	complex	COL17A1	True	False	False	curated	True	0.016	0.548	0.83	0.593	0.96	1.534	0.571	0.537
CPI-SC08BF895FC	COL13A1_a1b1	complex	simple:Q5TAT6	complex:a1b1	complex	COL13A1	False	False	False	curated	True	0.018	0.841	0.741	0.702	0.687	0.699	1.39	0.708	0.747
CPI-SS0EDD062F7	CCR3_CCL13	simple:P51677	simple:Q99616	CCR3	CCL13	True	True	False	curated	False	0.018	0.381	0.824	1.025	1.467	0.555	0.998	0.355	0.797
CPI-SC0035F0B0F	COL19A1_a11b1	complex	simple:Q14993	complex:a11b1	complex	COL19A1	True	False	False	curated	True	0.018	1.297	0.869	1.898	0.886	0.565	0.136	1.166	0.153
CPI-SS0C1F25516	CD8A_CEACAM5	simple:P01732	simple:P06731	CD8A	CEACAM5	True	True	False	curated	False	0.018	1.272	0.608	0.637	0.547	1.184	0.663	0.608	1.3
CPI-SC0CA323AE3	COL11A2_a11b1	complex	simple:P13942	complex:a11b1	complex	COL11A2	True	False	False	curated	True	0.018	0.52	0.092	1.121	0.109	0.552	0.124	1.154	0.141
CPI-SC0BAB29E69	F2_a2Bb3	complex	simple:P00734	complex:a2Bb3	complex	F2	True	False	False	curated	True	0.018	0.236	0.175	0.473	0.144	0.652	0.591	0.889	0.56
CPI-SC0EC380922	F2_aVb3	complex	simple:P00734	complex:aVb3	complex	F2	True	False	False	curated	True	0.018	0.236	0.175	0.473	0.144	0.652	0.591	0.889	0.56
CPI-SS0E7EDE823	CCR3_CCL8	simple:P51677	simple:P80075	CCR3	CCL8	True	True	False	curated	False	0.018	0.412	1.395	1.056	2.039	0.587	1.569	0.386	1.369
CPI-SC001AFA16D	NRTN_RET	receptor	2	simple:Q99748	complex:RET	receptor	2	NRTN	True	False	True	curated	False	0.018	0.833	1.643	1.185	0.854	0.252	1.061	0.603	0.272
CPI-SC02E74AFA5	MMP2_aVb3	complex	simple:P08253	complex:aVb3	complex	MMP2	True	False	False	curated	True	0.018	0.23	0.17	0.468	0.139	0.697	0.637	0.935	0.606
CPI-SC044E3F9B6	FGF2_aVb3	complex	simple:P09038	complex:aVb3	complex	FGF2	True	False	False	curated	True	0.018	0.716	0.655	0.953	0.624	0.314	0.253	0.551	0.222
CPI-CS0288D901D	ACVR_1A2B	receptor_BMP7	complex:ACVR_1A2B	receptor	simple:P18075	BMP7	True	True	False	curated	False	0.018	0.382	0.481	0.685	0.188	0.216	0.095	0.168	0.157
CPI-SC05A209BEC	FCER2_aVb3	complex	simple:P06734	complex:aVb3	complex	FCER2	True	True	False	curated	True	0.018	0.894	0.833	1.131	0.802	0.21	0.15	0.448	0.119
CPI-SS0907A7598	FGFR2_FGF9	simple:P21802	simple:P31371	FGFR2	FGF9	True	True	False	I2D,InnateDB-All	False	0.018	0.807	0.685	0.836	0.696	1.051	1.096	0.822	0.861
CPI-SS07CF0C6E7	CALCB_CALCR	simple:P10092	simple:P30988	CALCB	CALCR	True	False	True	guidetopharmacology.org	False	0.018	0.922	0.753	0.941	0.857	0.308	0.139	0.328	0.243
CPI-SS0CB863B46	WNT5A_PTPRK	simple:P41221	simple:Q15262	WNT5A	PTPRK	True	False	True	InnateDB-All	False	0.018	1.302	0.506	0.938	0.142	0.976	0.18	0.91	0.114
CPI-CS0C99F8D96	BMR1A_AVR2B_BMP7	complex:BMR1A_AVR2B	simple:P18075	BMP7	True	True	False	curated	False	0.018	0.382	0.481	0.685	0.188	0.216	0.095	0.168	0.157
CPI-SS0D4CA5D92	FGF18_FGFR4	simple:O76093	simple:P22455	FGF18	FGFR4	True	False	True	I2D	False	0.02	0.194	1.49	0.223	0.15	1.446	0.179	0.113	1.409	0.142
CPI-CS08CC8F9D3	ACVR1_BMPR2_BMP7	complex:ACVR1_BMPR2	simple:P18075	BMP7	True	True	False	curated	False	0.02	0.27	0.704	0.202	0.305	0.584	0.941	0.277	0.172	0.492
CPI-CS0D35E69F6	BMR1A_ACR2A_BMP7	complex:BMR1A_ACR2A	simple:P18075	BMP7	True	True	False	curated	False	0.02	0.136	0.216	0.136	0.322	0.128	0.153	0.137	0.2	0.113
CPI-CS0E54FF657	BMPR1A_BMPR2_BMP4	complex:BMPR1A_BMPR2	simple:P12644	BMP4	True	True	False	curated	False	0.02	0.308	0.463	0.29	0.229	0.385	0.247	0.379	0.457	0.715
CPI-SS084816B12	HCRT_HCRTR1	simple:O43612	simple:O43613	HCRT	HCRTR1	True	False	True	guidetopharmacology.org	False	0.02	0.912	1.167	0.93	0.541	0.796	0.559	0.25	0.505	0.268
CPI-CS046B3C139	ACVR_1A2A	receptor_BMP7	complex:ACVR_1A2A	receptor	simple:P18075	BMP7	True	True	False	curated	False	0.02	0.136	0.216	0.136	0.322	0.128	0.153	0.137	0.2	0.113
CPI-CS0B9A4CA4D	BMPR1A_BMPR2_GDF6	complex:BMPR1A_BMPR2	simple:Q6KF10	GDF6	True	True	False	curated	False	0.02	0.445	0.601	0.428	0.366	0.523	0.385	0.516	0.595	0.853
CPI-SS06B94F144	NPR2_NPPC	simple:P20594	simple:P23582	NPR2	NPPC	True	True	False	guidetopharmacology.org	False	0.02	0.949	1.827	0.709	0.425	1.303	0.185	0.477	1.355	0.237
CPI-SS070C51D94	FZD7_WNT3	simple:O75084	simple:P56703	FZD7	WNT3	True	True	False	curated	False	0.023	0.92	0.719	0.266	0.765	0.563	0.812	0.61	0.157	0.75	0.548
CPI-CS0546460D1	BMR1A_AVR2B_GDF6	complex:BMR1A_AVR2B	simple:Q6KF10	GDF6	True	True	False	curated	False	0.023	0.629	0.332	0.728	0.933	0.435	0.463	0.343	0.415	0.404	0.331
CPI-CS0C57A3081	PlexinA1_complex1_SEMA6D	complex:PlexinA1_complex1	simple:Q8NFY4	SEMA6D	False	True	False	curated	False	0.023	0.12	0.406	0.113	0.399	0.111	0.397	1.176	1.461	0.64	0.926
CPI-CS0BCDC40FC	BMR1A_AVR2B_BMP4	complex:BMR1A_AVR2B	simple:P12644	BMP4	True	True	False	curated	False	0.023	0.492	0.194	0.591	0.795	0.298	0.326	0.205	0.278	0.267	0.194
CPI-SS0883B7EE4	FGFR3_FGF23	simple:P22607	simple:Q9GZV9	FGFR3	FGF23	True	True	False	I2D	False	0.023	0.212	0.553	0.952	1.294	0.262	0.603	0.78	1.121	0.216	0.557
CPI-SS0C916344D	AVP_OXTR	simple:P01185	simple:P30559	AVP	OXTR	True	False	True	I2D	False	0.023	0.214	0.322	0.413	1.051	0.21	0.213	0.321	0.412	1.049	0.209
CPI-SS0B337B316	TEK_ANGPT1	simple:Q02763	simple:Q15389	TEK	ANGPT1	True	True	False	curated	False	0.023	0.178	0.135	0.522	0.48	1.123	1.08	0.169	0.127	0.222	0.18
CPI-SS0C98C08DA	CCR2_CCL13	simple:P41597	simple:Q99616	CCR2	CCL13	True	True	False	curated	False	0.023	0.295	0.738	0.322	0.764	0.359	0.801	0.815	1.258	0.314	0.756
CPI-SC0BA41B0D3	COL19A1_a1b1	complex	simple:Q14993	complex:a1b1	complex	COL19A1	True	False	False	curated	True	0.023	0.95	0.911	0.897	0.909	1.599	0.917	0.956	0.218	0.867	0.224
CPI-SS0D636A374	FGF2_FGFR3	simple:P09038	simple:P22607	FGF2	FGFR3	True	False	True	curated	False	0.023	0.634	1.375	0.684	1.202	0.638	0.232	0.973	0.282	0.8	0.236
CPI-SS09AFCF898	CCR2_CCL8	simple:P41597	simple:P80075	CCR2	CCL8	True	True	False	curated	False	0.023	0.327	1.309	0.353	1.336	0.39	1.373	0.847	1.829	0.345	1.328
CPI-SS073811AB3	TNFRSF11B_TNFSF11	simple:O00300	simple:O14788	TNFRSF11B	TNFSF11	True	False	True	curated	False	0.023	0.887	0.99	0.969	1.913	0.871	0.154	0.258	0.236	1.18	0.138
CPI-SS0B6643F31	XCR1_XCL1	simple:P46094	simple:P47992	XCR1	XCL1	True	True	False	curated	False	0.025	1.087	1.504	2.883	2.054	1.589	1.084	0.948	0.733	2.113	1.283	0.819
CPI-CS0DDFD82E7	IL11	receptor_IL11	complex:IL11	receptor	simple:P20809	IL11	True	True	False	curated	False	0.025	0.213	0.326	0.325	0.238	0.386	0.229	0.237	0.251	0.459	0.281	0.195
CPI-SS0DF5E47DB	SCGB3A1_MARCO	simple:Q96QR1	simple:Q9UEW3	SCGB3A1	MARCO	True	False	True	I2D,InnateDB-All	False	0.025	0.729	0.779	0.486	1.945	0.786	0.24	0.782	0.831	0.538	1.998	0.839
CPI-SS03188FD02	CCR8_CCL18	simple:P51685	simple:P55774	CCR8	CCL18	True	True	False	curated	False	0.027	0.169	0.701	1.214	1.021	1.554	2.067	0.218	0.751	1.264	0.167	0.699	1.212
CPI-SS0B537DD3F	CEACAM5_CEACAM1	simple:P06731	simple:P13688	CEACAM5	CEACAM1	True	False	False	curated	False	0.027	0.534	1.167	0.554	1.379	0.498	0.512	1.256	0.501	0.551	1.097	0.782	0.583
CPI-SS0CC136A8D	AGRP_MC5R	simple:O00253	simple:P33032	AGRP	MC5R	True	False	True	guidetopharmacology.org	False	0.027	0.543	0.202	0.202	0.435	0.094	0.094	0.53	0.189	0.189	0.858	0.516	0.516
CPI-SS0C56C483F	WNT5A_ANTXR1	simple:P41221	simple:Q9H6X2	WNT5A	ANTXR1	True	False	True	InnateDB-All	False	0.027	0.503	1.01	0.455	0.138	0.645	0.09	0.177	0.684	0.129	0.11	0.617	0.062
CPI-SS0DC5ADBF1	WNT1_FZD1	simple:P04628	simple:Q9UP38	WNT1	FZD1	True	False	True	curated	False	0.027	0.892	0.953	1.065	1.314	0.892	1.169	0.111	0.173	0.284	0.534	0.112	0.388
CPI-SS0F21DBF93	SCGB3A1_NOTCH3	simple:Q96QR1	simple:Q9UM47	SCGB3A1	NOTCH3	True	False	True	InnateDB-All	False	0.027	0.156	0.336	0.458	0.157	0.761	0.354	0.209	0.388	0.511	0.209	0.814	0.407
CPI-SS0B0AC1603	CCL24_CCR3	simple:O00175	simple:P51677	CCL24	CCR3	True	False	True	curated	False	0.027	0.195	0.839	0.369	0.169	0.486	1.13	0.66	0.46	0.764	1.407	0.938	0.738
CPI-SS0ADA38C78	ACKR2_CCL7	simple:O00590	simple:P80098	ACKR2	CCL7	True	True	False	curated	False	0.027	0.477	0.362	0.38	1.172	0.546	0.431	0.449	1.24	0.31	0.195	0.213	1.004
CPI-SS052D34F0B	XCR1_XCL2	simple:P46094	simple:Q9UBD3	XCR1	XCL2	True	True	False	curated	False	0.027	1.402	1.85	2.586	2.174	1.765	1.231	0.987	0.632	1.08	1.815	1.403	0.995
CPI-SS0E7CBFD03	WNT5A_ROR2	simple:P41221	simple:Q01974	WNT5A	ROR2	True	False	True	I2D	False	0.027	0.789	0.447	0.663	0.424	0.082	0.298	0.463	0.121	0.337	0.396	0.054	0.27
CPI-SS0230EE330	NPPA_NPR2	simple:P01160	simple:P20594	NPPA	NPR2	True	False	True	I2D,InnateDB-All	False	0.027	0.846	0.323	0.374	0.629	0.106	0.157	0.771	0.247	0.299	0.784	0.26	0.312
CPI-SC0A8902C85	COL3A1_a11b1	complex	simple:P02461	complex:a11b1	complex	COL3A1	True	False	False	curated	True	0.027	0.508	0.08	1.109	0.097	0.608	0.179	1.209	0.196	0.721	0.292	1.322	0.309
CPI-SC04FDBA606	PLG_a2Bb3	complex	simple:P00747	complex:a2Bb3	complex	PLG	True	False	False	curated	True	0.027	0.177	0.116	0.414	0.085	0.282	0.221	0.519	0.19	0.834	0.773	1.071	0.742
CPI-SC0A58E6695	TNC_aVb3	complex	simple:P24821	complex:aVb3	complex	TNC	True	False	False	curated	True	0.027	0.351	0.29	0.588	0.259	0.479	0.419	0.717	0.387	0.205	0.144	0.442	0.113
CPI-SS0D26F639E	KIR2DL3_CXCL9	simple:P43628	simple:Q07325	KIR2DL3	CXCL9	True	True	False	IMEx,IntAct	False	0.027	1.112	0.435	1.797	1.123	0.446	1.808	1.507	0.831	2.192	1.691	1.014	2.376
CPI-SC0CCF30377	COL13A1_a2b1	complex	simple:Q5TAT6	complex:a2b1	complex	COL13A1	False	False	False	curated	True	0.027	0.235	0.75	0.283	0.271	0.19	0.784	0.697	0.733	1.298	0.831	0.819	0.738
CPI-SS03A875239	CCL16_CCR8	simple:O15467	simple:P51685	CCL16	CCR8	True	False	True	I2D	False	0.027	0.239	1.092	0.289	0.237	0.2	1.052	0.249	0.198	0.321	1.174	0.371	0.319
CPI-SC0530C27A8	VTN_aVb3	complex	simple:P04004	complex:aVb3	complex	VTN	True	False	False	curated	True	0.027	0.222	0.162	0.46	0.13	0.197	0.137	0.435	0.106	0.639	0.579	0.877	0.547
CPI-CS0C59AF029	IL33	receptor_IL33	complex:IL33	receptor	simple:O95760	IL33	True	True	False	curated	False	0.027	1.416	1.456	0.228	0.602	3.205	3.245	2.017	2.391	1.838	1.879	0.651	1.025
CPI-CS038376BA2	NKG2D	II	receptor_ULBP3	complex:NKG2D	II	receptor	simple:Q9BZM4	ULBP3	False	True	False	curated	False	0.027	0.364	0.452	0.33	0.419	0.327	0.508	0.596	0.359	0.447	0.578	0.666	0.279
CPI-SC0D7F33CFB	COL27A1_a1b1	complex	simple:Q8IZC6	complex:a1b1	complex	COL27A1	True	False	False	curated	True	0.027	0.547	0.508	0.494	0.506	1.196	0.514	0.553	0.882	0.863	0.828	0.833	0.827
CPI-SC01195CB48	TNC_a8b1	complex	simple:P24821	complex:a8b1	complex	TNC	True	False	False	curated	True	0.027	0.243	0.575	1.299	0.275	0.372	0.703	1.427	0.403	0.097	0.429	1.153	0.129
CPI-SS0F8ABC300	GALR2_GAL	simple:O43603	simple:P22466	GALR2	GAL	True	True	False	guidetopharmacology.org	False	0.027	0.572	0.276	0.633	0.337	0.768	0.472	0.692	0.396	0.6	0.304	0.589	0.293
CPI-SC0A0532ADC	COL4A1_a11b1	complex	simple:P02462	complex:a11b1	complex	COL4A1	True	False	False	curated	True	0.027	0.564	0.136	1.165	0.153	1.44	1.011	2.041	1.028	2.513	2.085	3.114	2.102
CPI-SC08067D831	VTN_a2Bb3	complex	simple:P04004	complex:a2Bb3	complex	VTN	True	False	False	curated	True	0.027	0.222	0.162	0.46	0.13	0.197	0.137	0.435	0.106	0.639	0.579	0.877	0.547
CPI-SC0725E3A76	COL13A1_a10b1	complex	simple:Q5TAT6	complex:a10b1	complex	COL13A1	False	False	False	curated	True	0.027	0.414	0.178	0.544	1.118	0.155	0.68	0.963	0.726	1.093	1.666	0.703	0.669
CPI-SS0A6477344	RXFP4_RLN3	simple:Q8TDU9	simple:Q8WXF3	RXFP4	RLN3	True	True	False	guidetopharmacology.org	False	0.027	0.342	0.479	0.303	0.295	0.099	0.236	0.061	0.053	0.132	0.269	0.094	0.086
CPI-SC0E5218AA4	NRG1_a6b4	complex	simple:Q02297	complex:a6b4	complex	NRG1	True	True	False	curated	True	0.027	0.654	0.69	1.21	0.332	1.019	1.054	1.574	0.697	0.947	0.982	1.502	0.624
CPI-SC0E4E54E13	COL11A2_a2b1	complex	simple:P13942	complex:a2b1	complex	COL11A2	True	False	False	curated	True	0.029	0.216	0.166	0.731	0.264	0.252	0.171	0.248	0.162	0.198	0.763	0.296	0.284	0.203
CPI-SS0E928B8C8	FGF7_FGFR2	simple:P21781	simple:P21802	FGF7	FGFR2	True	False	True	I2D,IMEx,InnateDB-All,IntAct	False	0.029	0.639	0.685	0.71	0.639	0.751	0.855	0.794	0.654	0.706	0.686	0.691	0.656	0.906
CPI-SS02E314589	FGFR2_NECTIN1	simple:P21802	simple:Q15223	FGFR2	NECTIN1	True	True	True	InnateDB-All	False	0.029	0.699	0.777	0.875	0.67	2.059	1.142	0.806	0.837	0.714	0.776	0.702	0.659	0.699
CPI-CS04C402DFB	BMR1A_ACR2A_GDF6	complex:BMR1A_ACR2A	simple:Q6KF10	GDF6	True	True	False	curated	False	0.029	0.384	0.338	0.353	0.464	0.354	0.383	0.569	0.375	0.401	0.384	0.354	0.447	0.36
CPI-CS012D15A88	BMR1A_ACR2A_BMP4	complex:BMR1A_ACR2A	simple:P12644	BMP4	True	True	False	curated	False	0.029	0.246	0.2	0.215	0.326	0.216	0.246	0.432	0.238	0.263	0.247	0.217	0.31	0.223
CPI-SC0D6C777F2	COL11A2_a10b1	complex	simple:P13942	complex:a10b1	complex	COL11A2	True	False	False	curated	True	0.029	0.113	0.395	0.159	0.525	1.099	0.136	0.145	0.427	0.191	0.557	1.131	0.168	0.134
CPI-SS0EB136379	WNT1_CD36	simple:P04628	simple:P16671	WNT1	CD36	True	False	True	InnateDB	False	0.032	0.889	0.902	1.074	1.507	1.524	1.672	1.476	1.632	0.293	0.727	0.744	0.892	0.696	0.851
CPI-SS03165AD8C	ACKR2_CCL2	simple:O00590	simple:P13500	ACKR2	CCL2	True	True	False	curated	False	0.032	0.307	0.337	0.892	1.299	0.455	0.376	0.406	0.961	1.367	0.524	0.17	0.725	1.131	0.288
CPI-SS022AE18AF	GPR42_CCL4L2	simple:O15529	simple:Q8NHW4	GPR42	CCL4L2	True	True	False	IMEx,IntAct	False	0.032	0.761	0.868	1.02	0.824	1.014	0.723	0.934	0.889	0.996	1.148	0.952	1.142	0.851	1.063
CPI-SC0ADD7BEF0	COL19A1_a2b1	complex	simple:Q14993	complex:a2b1	complex	COL19A1	True	False	False	curated	True	0.032	0.993	0.907	0.942	1.508	1.041	1.028	0.947	0.261	0.175	0.21	0.776	0.309	0.296	0.215
CPI-SS039863E62	CCL25_CCR9	simple:O15444	simple:P51686	CCL25	CCR9	True	False	True	curated	False	0.032	0.59	0.408	0.383	0.965	0.417	0.458	0.308	0.684	0.855	0.673	0.648	1.23	0.682	0.723
CPI-CS07B61574B	LIFR_LIF	complex:LIFR	simple:P15018	LIF	True	True	False	curated	False	0.032	0.573	1.334	1.274	0.807	1.355	2.116	2.056	1.589	0.91	2.381	3.143	3.082	2.616	1.937
CPI-SC07E958BDE	COL5A3_a11b1	complex	simple:P25940	complex:a11b1	complex	COL5A3	True	False	False	curated	True	0.032	0.523	1.124	0.79	0.361	1.391	0.378	0.661	0.232	1.262	0.249	1.025	0.596	1.626	0.613
CPI-SS0B7BC0E4D	CCL24_CCR2	simple:O00175	simple:P41597	CCL24	CCR2	True	False	True	guidetopharmacology.org	False	0.032	0.136	0.172	0.629	0.128	0.4	0.427	0.464	0.92	0.419	0.678	0.704	0.741	1.198	0.696
CPI-SC09DFB2ACA	COL19A1_a10b1	complex	simple:Q14993	complex:a10b1	complex	COL19A1	True	False	False	curated	True	0.032	0.89	1.172	0.935	1.302	1.876	0.913	0.879	0.158	0.44	0.203	0.57	1.143	0.181	0.147
CPI-SS0E134097C	FGF18_FGFR3	simple:O76093	simple:P22607	FGF18	FGFR3	True	False	True	I2D	False	0.034	0.205	0.946	0.255	0.773	0.209	0.161	0.902	0.211	0.73	0.166	0.124	0.865	0.174	0.692	0.128
CPI-SC056BF6CBB	TNC_a9b1	complex	simple:P24821	complex:a9b1	complex	TNC	True	False	False	curated	True	0.034	0.28	0.51	0.27	0.481	0.819	0.408	0.639	0.398	0.609	0.947	0.134	0.364	0.124	0.335	0.673
CPI-SC019DBDA78	VCAM1_aDb2	complex	simple:P19320	complex:aDb2	complex	VCAM1	False	False	False	curated	True	0.034	0.751	0.685	0.64	1.323	0.809	0.818	0.418	0.352	0.99	0.364	0.936	1.653	1.587	1.542	2.225
CPI-SS0467AFD8A	FGF17_FGFR1	simple:O60258	simple:P11362	FGF17	FGFR1	True	False	True	I2D,InnateDB-All	False	0.034	0.597	0.631	0.548	0.722	0.685	0.57	0.663	0.595	0.979	1.014	0.784	0.794	1.553	0.921	0.849
CPI-SS0747FCACD	CXCL11_ACKR3	simple:O14625	simple:P25106	CXCL11	ACKR3	True	False	True	guidetopharmacology.org	False	0.034	0.338	0.204	0.224	0.105	0.2	0.51	0.375	0.395	0.276	0.372	0.892	0.758	0.778	0.659	0.754
CPI-SS0C491A3C1	PPBP_CXCR2	simple:P02775	simple:P25025	PPBP	CXCR2	True	False	True	curated	False	0.034	2.078	0.251	0.773	0.354	0.271	2.023	0.196	0.718	0.299	0.217	2.323	0.495	1.018	0.598	0.516
CPI-SS07AB1C381	PPBP_CXCR1	simple:P02775	simple:P25024	PPBP	CXCR1	True	False	True	curated	False	0.034	1.917	0.309	0.875	0.351	0.255	1.862	0.254	0.82	0.297	0.2	2.161	0.554	1.119	0.596	0.499
CPI-SS093922D5A	CCL16_CCR2	simple:O15467	simple:P41597	CCL16	CCR2	True	False	True	curated	False	0.034	0.205	0.232	0.268	0.725	0.224	0.166	0.192	0.229	0.686	0.184	0.287	0.314	0.35	0.807	0.306
CPI-SC090068F7B	TSLP_TSLPR	simple:Q969D9	complex:TSLPR	TSLP	True	False	True	curated	False	0.034	1.416	0.388	0.458	0.594	0.519	1.143	0.115	0.186	0.322	0.246	1.418	0.39	0.461	0.597	0.521
CPI-SS0348DB5E3	FGFR1_FGFR2	simple:P11362	simple:P21802	FGFR1	FGFR2	True	True	True	InnateDB-All	False	0.034	0.68	0.715	0.631	0.805	0.768	0.653	0.747	0.678	1.062	1.097	0.867	0.877	1.636	1.004	0.933
CPI-SS062DED513	ADCYAP1_VIPR1	simple:P18509	simple:P32241	ADCYAP1	VIPR1	True	False	True	I2D	False	0.034	0.433	0.455	0.224	0.247	0.158	2.84	2.863	2.632	2.655	2.566	0.948	0.971	0.74	0.763	0.674
CPI-SS00797FD15	EDA_EDA2R	simple:Q92838	simple:Q9HAV5	EDA	EDA2R	True	False	True	guidetopharmacology.org	False	0.034	0.792	1.235	0.305	0.366	0.276	0.976	1.419	0.488	0.55	0.459	0.895	1.339	0.408	0.47	0.379
CPI-SS02AFCED82	EPHA2_EFNA5	simple:P29317	simple:P52803	EPHA2	EFNA5	False	True	False	curated	False	0.034	0.333	0.71	0.605	0.711	1.089	0.983	1.217	1.594	1.489	0.73	1.107	1.002	0.4	0.777	0.672
CPI-SS0F15C1AB3	NRP2_SEMA3F	simple:O60462	simple:Q13275	NRP2	SEMA3F	True	True	False	curated	False	0.034	0.156	0.277	0.524	0.355	0.476	0.722	1.037	1.158	1.404	0.784	0.905	1.152	0.182	0.303	0.55
CPI-SS086615F9B	CSF1_CELSR3	simple:P09603	simple:Q9NYQ7	CSF1	CELSR3	True	False	True	I2D	False	0.034	0.372	0.349	0.229	0.344	0.321	2.472	2.448	0.595	0.572	0.254	0.231	0.339	0.316	0.286	0.263
CPI-SS02572E1EF	NRG1_LGR4	simple:Q02297	simple:Q9BXB1	NRG1	LGR4	True	True	True	InnateDB-All	False	0.034	0.458	0.308	0.532	0.379	0.573	0.823	0.673	0.897	0.743	0.938	0.751	0.601	0.825	0.671	0.865
CPI-SC05F111D21	COL27A1_a11b1	complex	simple:Q8IZC6	complex:a11b1	complex	COL27A1	True	False	False	curated	True	0.034	0.894	0.466	1.495	0.482	0.58	1.181	0.168	0.561	1.162	0.526	1.127	0.531	1.132	0.525	1.126
CPI-SS0586F2596	EPHB2_EFNA5	simple:P29323	simple:P52803	EPHB2	EFNA5	False	True	False	curated	False	0.034	0.514	0.892	0.786	0.742	1.119	1.013	0.429	0.806	0.701	0.834	1.211	1.105	0.428	0.805	0.699
CPI-SS045A5FC60	ACKR2_CCL14	simple:O00590	simple:Q16627	ACKR2	CCL14	True	True	False	curated	False	0.034	0.285	0.321	0.886	1.874	0.37	0.354	0.389	0.955	1.942	0.439	0.117	0.153	0.718	1.706	0.203
CPI-SS0EB4002A2	NPR3_NPPC	simple:P17342	simple:P23582	NPR3	NPPC	True	True	False	I2D,InnateDB-All	False	0.034	0.393	1.271	0.153	0.956	1.834	0.717	0.934	1.812	0.695	1.544	2.422	1.304	0.496	1.374	0.256
CPI-SS0BE567EFB	GAL_GALR1	simple:P22466	simple:P47211	GAL	GALR1	True	False	True	guidetopharmacology.org	False	0.036	0.608	0.617	0.785	1.616	0.921	0.586	0.594	0.612	0.312	0.321	0.489	1.319	0.625	0.29	0.298	0.316
CPI-SC03BFF1D95	COL15A1_a11b1	complex	simple:P39059	complex:a11b1	complex	COL15A1	True	False	False	curated	True	0.036	0.887	0.459	1.488	0.476	1.554	1.126	2.155	1.143	0.563	0.134	1.164	0.151	0.515	0.087	1.116	0.103
CPI-SS04C396C5D	VGF_NTRK1	simple:O15240	simple:P04629	VGF	NTRK1	True	False	True	InnateDB-All	False	0.036	0.106	0.464	1.267	0.66	0.208	0.566	1.368	0.761	0.56	0.917	1.72	1.113	0.293	0.651	1.454	0.847
CPI-SC0014D5A6E	COL16A1_a11b1	complex	simple:Q07092	complex:a11b1	complex	COL16A1	True	False	False	curated	True	0.036	0.765	0.336	1.366	0.353	0.787	0.358	1.388	0.375	0.9	0.471	1.501	0.488	0.571	0.142	1.172	0.159
CPI-SS015B2F961	CALCA_CALCR	simple:P01258	simple:P30988	CALCA	CALCR	True	False	True	guidetopharmacology.org	False	0.036	0.349	0.18	0.369	0.284	0.326	0.157	0.345	0.26	0.307	0.138	0.326	0.241	0.34	0.171	0.36	0.275
CPI-SS0F531DDEB	CALCA_CALCR	simple:P06881	simple:P30988	CALCA	CALCR	True	False	True	guidetopharmacology.org	False	0.036	0.349	0.18	0.369	0.284	0.326	0.157	0.345	0.26	0.307	0.138	0.326	0.241	0.34	0.171	0.36	0.275
CPI-SC0A68C5F13	IGF1_a6b4	complex	simple:P05019	complex:a6b4	complex	IGF1	True	False	False	curated	True	0.036	0.725	0.761	1.281	0.403	0.44	0.475	0.995	0.118	0.757	0.792	1.313	0.435	1.188	1.223	1.743	0.865
CPI-SS032CFAE42	CALCR_ADM2	simple:P30988	simple:Q7Z4H4	CALCR	ADM2	True	True	False	guidetopharmacology.org	False	0.036	0.556	0.808	1.339	0.417	0.387	0.639	1.17	0.248	0.576	0.827	1.359	0.436	0.491	0.742	1.274	0.352
CPI-SC0A54B5323	COL6A2_a11b1	complex	simple:P12110	complex:a11b1	complex	COL6A2	True	False	False	curated	True	0.036	0.747	0.319	1.348	0.336	0.632	1.233	1.132	0.704	1.733	0.721	0.965	0.536	1.566	0.553	0.556	1.157
CPI-SC03D71E025	COL7A1_a11b1	complex	simple:Q02388	complex:a11b1	complex	COL7A1	True	False	False	curated	True	0.036	0.655	0.227	1.257	0.244	0.658	0.23	1.259	0.247	0.554	0.126	1.155	0.142	0.922	0.493	1.523	0.51
CPI-SS09F430F14	NGFR_IL2	simple:P08138	simple:P60568	NGFR	IL2	True	True	False	I2D	False	0.036	0.818	0.236	0.541	0.349	0.951	0.368	0.674	0.481	1.945	1.363	1.668	1.475	0.851	0.269	0.574	0.382
CPI-SC0BC63F8C0	COL3A1_a1b1	complex	simple:P02461	complex:a1b1	complex	COL3A1	True	False	False	curated	True	0.036	0.81	0.167	0.261	0.222	0.207	0.219	0.91	0.228	0.267	0.374	0.335	0.32	0.332	1.023	0.341	0.38
CPI-SC0B4BD965C	COL9A3_a11b1	complex	simple:Q14050	complex:a11b1	complex	COL9A3	True	False	False	curated	True	0.036	1.101	0.673	1.703	0.69	0.7	0.272	1.302	0.289	0.61	0.182	1.211	0.199	0.894	0.466	1.495	0.482
CPI-SC06ACCFA52	COL24A1_a11b1	complex	simple:Q17RW2	complex:a11b1	complex	COL24A1	True	False	False	curated	True	0.036	0.582	0.154	1.183	0.171	1.237	0.808	1.838	0.825	0.972	0.543	1.573	0.56	0.595	0.167	1.197	0.184
CPI-SS0E7523314	WNT3_FZD1	simple:P56703	simple:Q9UP38	WNT3	FZD1	True	False	True	I2D	False	0.036	0.744	0.806	0.917	1.167	0.745	1.021	0.543	0.605	0.716	0.965	0.544	0.82	0.152	0.263	0.512	0.367
CPI-SC041215790	COL26A1_a11b1	complex	simple:Q96A83	complex:a11b1	complex	COL26A1	True	False	False	curated	True	0.036	0.553	0.124	1.154	0.141	1.023	0.595	1.625	0.612	0.85	0.421	1.451	0.438	0.558	0.129	1.159	0.146
CPI-SS0815A0EE0	CCR3_CCL26	simple:P51677	simple:Q9Y258	CCR3	CCL26	True	True	False	curated	False	0.036	0.274	0.2	0.599	0.202	0.918	0.844	1.243	0.846	0.448	0.374	0.773	0.376	0.248	0.174	0.573	0.176
CPI-SS04297753E	SPP1_CCR8	simple:P10451	simple:P51685	SPP1	CCR8	True	False	True	IMEx,MINT	False	0.036	0.557	1.41	0.607	0.555	1.939	2.791	1.988	1.937	0.201	1.053	0.25	0.199	0.616	1.468	0.665	0.614
CPI-SS0CBA3DA0D	CCR3_CCL7	simple:P51677	simple:P80098	CCR3	CCL7	True	True	False	curated	False	0.036	0.392	0.278	0.296	1.087	1.036	0.921	0.939	1.731	0.567	0.452	0.47	1.261	0.366	0.252	0.27	1.061
CPI-SS0816A4ED4	FGFR4_EPHA4	simple:P22455	simple:P54764	FGFR4	EPHA4	True	True	True	I2D,InnateDB-All	False	0.036	0.141	0.159	0.441	1.437	1.394	1.387	1.391	1.455	1.384	1.737	0.17	0.127	0.12	0.124	0.188	0.47
CPI-SC0E1037D03	VWF_aVb3	complex	simple:P04275	complex:aVb3	complex	VWF	True	False	False	curated	True	0.036	0.441	0.381	0.679	0.35	0.237	0.177	0.475	0.146	0.248	0.187	0.485	0.156	0.456	0.395	0.693	0.364
CPI-SC0988E0218	SPP1_aVb3	complex	simple:P10451	complex:aVb3	complex	SPP1	True	False	False	curated	True	0.036	0.589	0.528	0.826	0.497	1.97	1.91	2.208	1.879	0.232	0.172	0.47	0.14	0.647	0.587	0.885	0.555
CPI-SS0C7915758	CXCR2_CXCL6	simple:P25025	simple:P80162	CXCR2	CXCL6	True	True	False	curated	False	0.039	1.944	1.995	2.037	2.049	0.209	0.222	0.639	0.69	0.732	0.744	0.22	0.27	0.312	0.325	0.188	0.23	0.243
CPI-SS0F3A089DE	SEMA3E_PLXND1	simple:O15041	simple:Q9Y4D7	SEMA3E	PLXND1	True	False	True	curated	False	0.039	0.359	0.353	0.407	0.527	0.404	0.361	0.932	0.388	0.695	0.591	0.36	0.48	0.357	0.885	0.342	0.648	0.545
CPI-SC0672FBD31	COL4A1_a1b1	complex	simple:P02462	complex:a1b1	complex	COL4A1	True	False	False	curated	True	0.039	0.218	0.866	0.223	1.093	1.054	1.039	1.052	1.742	1.06	1.099	2.167	2.128	2.113	2.125	2.815	2.134	2.172
CPI-SS0AE4CF4E7	ACKR2_CCL5	simple:O00590	simple:P13501	ACKR2	CCL5	True	True	False	curated	False	0.039	2.257	1.381	1.596	2.381	1.677	1.774	2.326	1.449	1.664	2.45	1.745	1.842	2.09	1.428	2.213	1.509	1.606
CPI-SC0674C647E	COL4A3_a11b1	complex	simple:Q01955	complex:a11b1	complex	COL4A3	True	False	False	curated	True	0.039	1.133	0.704	1.734	0.721	0.495	1.097	0.084	0.518	1.119	0.107	1.035	0.607	1.637	0.624	0.536	1.137	0.124
CPI-SC04085F9F9	COL6A1_a11b1	complex	simple:P12109	complex:a11b1	complex	COL6A1	True	False	False	curated	True	0.039	0.535	1.136	0.123	0.684	0.256	1.286	0.273	0.746	0.318	1.348	0.335	0.526	1.127	0.115	0.519	1.12	0.108
CPI-SC09FDA4F45	COL6A1_a1b1	complex	simple:P12109	complex:a1b1	complex	COL6A1	True	False	False	curated	True	0.039	0.837	0.338	0.299	0.284	0.296	0.987	0.305	0.343	0.4	0.361	0.346	0.358	1.049	0.367	0.406	0.828	0.821
CPI-SS00D3CD86E	TTR_DDR1	simple:P02766	simple:Q08345	TTR	DDR1	True	False	True	I2D,IMEx,InnateDB-All,IntAct	False	0.039	0.087	0.194	0.564	0.146	0.516	0.182	0.552	0.36	0.355	0.349	0.467	0.836	0.882	0.878	0.872	0.989	1.359
CPI-SS035E5A708	DLL3_NOTCH3	simple:Q9NYJ7	simple:Q9UM47	DLL3	NOTCH3	False	False	True	curated	False	0.041	0.347	0.526	0.649	0.347	0.951	0.544	0.159	0.338	0.461	0.16	0.764	0.357	0.106	0.286	0.408	0.107	0.711	0.304
CPI-SC07FB88720	COL4A3_a1b1	complex	simple:Q01955	complex:a1b1	complex	COL4A3	True	False	False	curated	True	0.041	0.786	0.747	0.732	0.744	1.435	0.753	0.792	0.798	0.82	0.689	0.65	0.635	0.647	1.338	0.656	0.695	0.189	0.838
CPI-SS03A2EFDD5	EPHA1_EFNA5	simple:P21709	simple:P52803	EPHA1	EFNA5	False	True	False	curated	False	0.041	0.614	0.991	0.885	0.553	0.931	0.825	0.434	0.812	0.706	0.471	0.849	0.743	0.53	0.907	0.802	0.34	0.718	0.612
CPI-SS033E857EB	VSTM1_ADGRG3	simple:Q6UX27	simple:Q86Y34	VSTM1	ADGRG3	True	True	True	IMEx,IntAct	False	0.041	1.641	0.579	0.321	0.944	0.563	0.303	2.087	1.025	0.767	1.39	1.009	0.749	1.826	0.764	0.506	1.129	0.748	0.488
CPI-SS08B85996F	TTR_NGFR	simple:P02766	simple:P08138	TTR	NGFR	True	False	True	IMEx,InnateDB-All,MINT	False	0.041	0.125	0.257	1.252	0.158	0.21	1.204	0.113	0.246	1.24	0.146	0.398	0.53	1.524	0.431	0.92	1.053	2.047	0.953
CPI-SS05A26A1DE	PDGFB_PDGFRB	simple:P01127	simple:P09619	PDGFB	PDGFRB	True	False	True	curated	False	0.041	0.214	0.734	0.436	0.284	0.956	0.891	0.739	1.411	0.317	0.165	0.837	0.547	0.395	1.067	0.214	0.733	0.291	0.81
CPI-SS07155793F	ACKR3_CXCL12	simple:P25106	simple:P48061	ACKR3	CXCL12	True	True	False	guidetopharmacology.org	False	0.043	0.34	0.418	0.832	1.342	0.205	0.284	0.697	1.207	0.225	0.304	0.717	1.228	0.185	0.598	1.109	0.202	0.28	0.693	1.204
CPI-SS05E63FBEC	CXCR1_CXCL5	simple:P25024	simple:P42830	CXCR1	CXCL5	True	True	False	curated	False	0.043	1.95	1.995	1.804	1.93	0.342	0.387	0.196	0.322	0.908	0.953	0.762	0.887	0.385	0.429	0.239	0.364	0.288	0.333	0.267
CPI-SS0C321CE6D	FPR2_CAMP	simple:P25090	simple:P49913	FPR2	CAMP	True	True	False	guidetopharmacology.org	False	0.043	1.272	0.307	2.223	1.258	1.046	1.648	0.683	0.471	1.35	0.385	2.183	1.218	1.007	1.633	0.667	0.456	1.807	0.842	0.631
CPI-SS073F3FAD5	WNT5A_ROR1	simple:P41221	simple:Q01973	WNT5A	ROR1	True	False	True	IMEx	False	0.043	0.796	0.447	0.45	0.427	0.446	0.911	0.431	0.082	0.085	0.082	0.546	0.47	0.121	0.123	0.101	0.12	0.584	0.403	0.518
CPI-SS0D954EA1C	PDGFRB_PDGFD	simple:P09619	simple:Q9GZP0	PDGFRB	PDGFD	True	True	False	curated	False	0.043	0.58	0.694	0.988	0.605	0.972	0.428	0.542	0.836	0.453	0.82	1.1	0.835	1.213	0.742	0.882	1.507	1.125	1.491	0.796
CPI-SS02CCE14A7	ADCYAP1_VIPR2	simple:P18509	simple:P41587	ADCYAP1	VIPR2	True	False	True	I2D	False	0.043	0.599	1.485	0.255	0.241	0.524	3.007	2.591	2.6	3.893	2.663	2.649	2.932	1.115	0.699	0.708	2.001	0.771	0.757	1.04
CPI-SS087BD262F	CXCR2_CXCL5	simple:P25025	simple:P42830	CXCR2	CXCL5	True	True	False	curated	False	0.043	2.111	2.156	1.966	2.091	0.284	0.329	0.264	0.806	0.851	0.661	0.786	0.387	0.432	0.241	0.367	0.305	0.349	0.159	0.284
CPI-SS0288E42FB	CXCR1_CXCL6	simple:P25024	simple:P80162	CXCR1	CXCL6	True	True	False	curated	False	0.043	1.783	1.833	1.875	1.888	0.175	0.225	0.267	0.28	0.741	0.791	0.833	0.846	0.218	0.268	0.31	0.323	0.171	0.213	0.226
CPI-SS09C4988F8	PROS1_TYRO3	simple:P07225	simple:Q06418	PROS1	TYRO3	True	False	True	guidetopharmacology.org	False	0.043	0.349	0.365	0.311	0.329	0.327	0.786	0.529	0.192	0.208	0.154	0.172	0.17	0.629	0.612	0.628	0.574	0.592	0.59	1.049
CPI-SS0C85BC9AF	PROS1_AXL	simple:P07225	simple:P30530	PROS1	AXL	True	False	True	guidetopharmacology.org	False	0.043	0.328	0.406	0.448	0.836	1.348	0.15	0.192	0.579	1.092	0.171	0.25	0.292	0.679	1.192	0.591	0.669	0.711	1.099	1.612
CPI-SS04318D03E	ACKR2_CCL3	simple:O00590	simple:P10147	ACKR2	CCL3	True	True	False	curated	False	0.043	0.697	1.306	1.723	1.452	0.647	1.044	2.067	0.766	1.375	1.791	1.52	0.715	1.113	2.135	1.139	1.555	1.284	0.876	1.899
CPI-SS092C1B321	CCR2_CCL26	simple:P41597	simple:Q9Y258	CCR2	CCL26	True	True	False	curated	False	0.043	0.188	0.513	0.116	0.215	0.141	0.54	0.143	0.252	0.178	0.577	0.18	0.708	0.634	1.033	0.636	0.207	0.133	0.532	0.135
CPI-SC08AF9CA91	COL8A2_a11b1	complex	simple:P25067	complex:a11b1	complex	COL8A2	True	False	False	curated	True	0.043	0.573	0.145	1.174	0.161	0.678	0.25	1.28	0.267	0.594	0.166	1.195	0.183	0.73	0.301	1.331	0.318	0.492	1.094	0.081
CPI-SC0681D30FE	COL1A2_a11b1	complex	simple:P08123	complex:a11b1	complex	COL1A2	True	False	False	curated	True	0.045	0.775	0.347	1.376	0.364	0.751	0.323	1.352	0.34	0.578	0.149	1.179	0.166	0.503	0.074	1.104	0.091	0.643	0.215	1.245	0.232
CPI-SS0AEC33FF1	CCL22_DPP4	simple:O00626	simple:P27487	CCL22	DPP4	True	False	True	curated	False	0.045	0.531	0.811	0.242	0.732	0.965	0.245	0.577	0.857	0.288	0.778	1.011	0.807	0.862	1.194	0.844	0.856	1.474	0.905	1.395	1.628
CPI-CS0D238C22B	PlexinA2_complex1_SEMA3A	complex:PlexinA2_complex1	simple:Q14563	SEMA3A	True	True	False	curated	False	0.045	0.098	0.542	0.32	0.113	0.192	0.153	0.597	0.375	0.167	0.246	0.232	0.676	0.454	0.246	0.326	0.138	0.582	0.36	0.153	0.232
CPI-SC06525B099	L1CAM_aVb3	complex	simple:P32004	complex:aVb3	complex	L1CAM	False	False	False	curated	True	0.045	0.221	0.16	0.458	0.129	0.197	0.137	0.435	0.106	0.324	0.263	0.561	0.232	0.204	0.143	0.441	0.112	0.226	0.166	0.464	0.135
CPI-SS018BD4882	NMU_NMUR1	simple:P48645	simple:Q9HB89	NMU	NMUR1	True	False	True	guidetopharmacology.org	False	0.045	0.275	0.829	0.806	0.356	0.887	1.036	1.59	1.007	1.568	1.118	1.649	0.284	0.838	0.815	0.366	0.896	0.757	0.734	0.284	0.815
CPI-SS0EF1A7415	CCR4_CCL17	simple:P51679	simple:Q92583	CCR4	CCL17	True	True	False	curated	False	0.045	0.452	0.167	0.501	0.431	0.146	0.48	0.457	0.173	0.507	1.444	1.16	1.494	0.575	0.291	0.625	0.976	0.691	1.025	0.411	0.461
CPI-SS04A7BCE8D	NPPA_NPR3	simple:P01160	simple:P17342	NPPA	NPR3	True	False	True	I2D,InnateDB-All	False	0.045	0.291	0.854	0.832	1.441	0.394	0.074	0.637	0.615	1.224	0.176	0.215	0.779	0.757	1.366	0.318	0.228	0.791	0.769	1.379	0.331
CPI-SS0EC70F078	SCT_VIPR1	simple:P09683	simple:P32241	SCT	VIPR1	True	False	True	I2D,InnateDB-All	False	0.045	0.43	0.452	0.221	0.244	0.155	1.683	1.706	1.475	1.497	1.409	0.912	0.935	0.704	0.726	0.638	0.486	0.509	0.278	0.3	0.212
CPI-SC0B6F1A278	COL4A1_a10b1	complex	simple:P02462	complex:a10b1	complex	COL4A1	True	False	False	curated	True	0.045	0.157	0.439	0.202	0.569	1.143	0.18	1.033	1.315	1.078	1.445	2.018	1.056	1.022	2.106	2.388	2.152	2.518	3.092	2.129	2.095
CPI-SC07312BD5C	FCER2_aMb2	complex	simple:P06734	complex:aMb2	complex	FCER2	True	True	False	curated	True	0.045	0.803	0.842	1.054	0.954	0.897	0.813	0.867	1.343	1.206	1.152	1.719	1.182	1.381	0.371	0.659	0.522	0.469	1.036	0.499	0.698
CPI-SS0B887F7AC	CCR1_CCL13	simple:P32246	simple:Q99616	CCR1	CCL13	True	True	False	guidetopharmacology.org	False	0.045	0.306	0.749	0.557	0.999	0.28	0.722	0.292	0.735	0.301	0.743	0.932	1.374	0.859	1.302	1.05	1.492	1.324	1.766	1.169	1.611
CPI-SS0649EA05F	FGFR4_FGF9	simple:P22455	simple:P31371	FGFR4	FGF9	True	True	False	I2D	False	0.045	0.249	0.277	0.492	0.537	0.264	0.303	1.545	1.422	1.573	1.433	1.788	1.833	1.56	1.599	0.278	0.306	0.521	0.567	0.293	0.332
CPI-SC0ECFACED2	COL6A3_a11b1	complex	simple:P12111	complex:a11b1	complex	COL6A3	True	False	False	curated	True	0.045	0.522	0.093	1.123	0.11	0.696	0.268	1.297	0.284	1.18	0.752	1.782	0.769	0.747	0.319	1.348	0.336	0.522	0.093	1.123	0.11
CPI-SC0F8D27FBC	COL15A1_a1b1	complex	simple:P39059	complex:a1b1	complex	COL15A1	True	False	False	curated	True	0.045	0.541	0.501	0.487	0.499	1.189	0.507	0.546	1.207	1.168	1.154	1.166	1.856	1.174	1.213	0.216	0.175	0.865	0.183	0.222	0.817
CPI-SS07F60834D	MET_HGF	simple:P08581	simple:P14210	MET	HGF	True	True	False	curated	False	0.045	0.467	1.038	0.635	0.28	0.32	0.586	1.157	0.753	0.399	0.438	0.342	0.913	0.51	0.155	0.195	0.832	1.403	0.999	0.645	0.684
CPI-SS0F8C2FA91	CCR1_CCL8	simple:P32246	simple:P80075	CCR1	CCL8	True	True	False	curated	False	0.045	0.338	1.32	0.588	1.571	0.311	1.294	0.324	1.306	0.332	1.315	0.963	1.946	0.891	1.873	1.081	2.064	1.355	2.338	1.2	2.183
CPI-SS0DFAF1FE2	CCR5_CCL8	simple:P51681	simple:P80075	CCR5	CCL8	True	True	False	curated	False	0.045	0.471	1.454	0.353	1.336	0.336	1.319	0.302	1.284	0.361	1.344	0.31	1.293	0.412	1.395	0.75	1.733	1.04	2.023	0.691	1.674
CPI-SS008EB600F	CCR2_CCL7	simple:P41597	simple:P80098	CCR2	CCL7	True	True	False	curated	False	0.045	0.307	0.192	0.21	1.001	0.333	0.218	0.236	1.028	0.37	0.255	0.273	1.064	0.826	0.712	0.73	1.521	0.325	0.21	0.228	1.02
CPI-SC01AB9BED7	SPP1_a9b1	complex	simple:P10451	complex:a9b1	complex	SPP1	True	False	False	curated	True	0.045	0.518	0.748	0.508	0.718	1.057	1.899	2.13	1.889	2.1	2.438	0.161	0.391	0.151	0.362	0.7	0.576	0.807	0.566	0.777	1.115
CPI-SS098F416C1	FGFR2_XPR1	simple:P21802	simple:Q9UBH6	FGFR2	XPR1	True	True	True	InnateDB-All	False	0.045	0.884	0.846	0.768	1.283	1.064	1.081	1.015	0.732	1.164	0.844	0.75	0.817	0.937	0.962	0.878	1.282	1.081	0.964	1.068	0.998
CPI-SS0FA7A69D9	CCR3_CCL14	simple:P51677	simple:Q16627	CCR3	CCL14	True	True	False	curated	False	0.045	0.2	0.236	0.801	1.789	0.286	0.844	0.88	1.445	2.433	0.929	0.374	0.41	0.975	1.963	0.46	0.174	0.21	0.775	1.763	0.26
CPI-SC0ED0520DD	LAMA3_a3b1	complex	simple:Q16787	complex:a3b1	complex	LAMA3	True	False	False	curated	True	0.045	0.491	0.42	0.395	0.783	0.811	0.44	0.519	0.489	0.603	0.884	0.385	0.676	0.383	0.42	0.389	0.508	0.536	0.328	0.61	0.401
CPI-SC02392F4AF	COL4A1_a2b1	complex	simple:P02462	complex:a2b1	complex	COL4A1	True	False	False	curated	True	0.045	0.26	0.209	0.775	0.308	0.296	0.215	1.136	1.05	1.085	1.651	1.184	1.171	1.09	2.209	2.123	2.159	2.724	2.257	2.245	2.164
CPI-SC054484F7B	COL3A1_a2b1	complex	simple:P02461	complex:a2b1	complex	COL3A1	True	False	False	curated	True	0.045	0.204	0.153	0.719	0.252	0.239	0.158	0.304	0.217	0.253	0.818	0.351	0.339	0.258	0.417	0.331	0.366	0.931	0.465	0.452	0.371
CPI-SS05550A895	WNT7A_FZD5	simple:O00755	simple:Q13467	WNT7A	FZD5	True	False	True	curated	False	0.045	0.365	0.886	0.7	0.371	0.37	0.368	0.365	0.525	0.372	0.95	0.476	0.996	0.81	0.481	0.48	0.479	0.476	0.635	0.482	1.06
CPI-SC00756BB93	THY1_aVb3	complex	simple:P04216	complex:aVb3	complex	THY1	False	False	False	curated	True	0.045	0.28	0.22	0.518	0.189	0.699	0.638	0.936	0.607	0.199	0.138	0.436	0.107	0.408	0.347	0.645	0.316	0.312	0.251	0.549	0.22
CPI-SS0FC01B947	EFNA5_EPHA4	simple:P52803	simple:P54764	EFNA5	EPHA4	False	False	True	curated	False	0.048	0.375	0.332	0.326	0.33	0.393	0.323	0.676	0.753	0.71	0.703	0.707	0.771	0.7	1.053	0.647	0.604	0.597	0.602	0.665	0.595	0.948
CPI-SC067433F6B	COL3A1_a10b1	complex	simple:P02461	complex:a10b1	complex	COL3A1	True	False	False	curated	True	0.048	0.101	0.383	0.146	0.513	1.087	0.124	0.09	0.2	0.483	0.246	0.613	1.186	0.223	0.189	0.314	0.596	0.359	0.726	1.299	0.336	0.303
CPI-SS0AFE077D8	ACKR2_CCL4	simple:O00590	simple:P13236	ACKR2	CCL4	True	True	False	curated	False	0.048	2.069	1.966	2.326	1.823	2.564	2.171	1.85	2.138	2.035	2.395	1.892	2.633	2.24	1.919	1.901	1.799	2.159	1.655	2.397	2.004	1.682
CPI-SS052B38F1C	CCL22_CCR4	simple:O00626	simple:P51679	CCL22	CCR4	True	False	True	curated	False	0.048	0.204	0.183	0.209	1.197	0.328	0.728	0.164	0.25	0.229	0.256	1.243	0.374	0.774	0.21	0.867	0.846	0.873	1.86	0.991	1.391	0.827
CPI-CS073D36B1D	FLT1	complex_PGF	complex:FLT1	complex	simple:P49763	PGF	True	True	False	curated	False	0.048	0.119	0.165	0.091	0.136	0.112	0.158	0.13	0.156	0.128	1.175	1.138	1.221	1.146	1.192	1.14	0.639	0.603	0.685	0.611	0.657	0.604
CPI-SC0092846B0	COL5A1_a11b1	complex	simple:P20908	complex:a11b1	complex	COL5A1	True	False	False	curated	True	0.048	0.519	1.12	0.526	1.128	0.573	1.174	0.161	1.039	0.611	1.641	0.628	0.51	1.111	0.7	0.272	1.301	0.288	1.119	0.691	1.72	0.707
CPI-SS06B86672A	CD44_FGFR2	simple:P16070	simple:P21802	CD44	FGFR2	True	True	True	InnateDB-All	False	0.048	1.65	1.507	1.486	1.305	1.261	1.409	1.886	1.118	1.164	1.958	2.051	1.316	1.735	1.857	1.179	1.709	1.876	1.782	1.871	1.811	2.093
CPI-SC0974B60B7	CD40LG_a2Bb3	complex	simple:P29965	complex:a2Bb3	complex	CD40LG	True	False	False	curated	True	0.048	0.194	0.431	0.445	0.713	0.653	0.951	0.622	0.857	0.796	1.094	0.765	0.19	0.428	0.965	0.905	1.203	0.874	0.838	0.777	1.075	0.746
CPI-SS0A1864A37	NPR1_NPPC	simple:P16066	simple:P23582	NPR1	NPPC	True	True	False	InnateDB-All	False	0.048	0.402	1.28	0.162	1.228	2.106	0.989	0.841	1.719	0.601	1.206	2.084	0.966	0.39	1.268	0.15	0.394	1.272	0.154	0.4	1.278	0.16
CPI-SS00D9A0644	FGFR2_CD83	simple:P21802	simple:Q01151	FGFR2	CD83	True	True	True	InnateDB-All	False	0.048	0.739	0.958	1.864	0.789	1.913	1.099	0.921	1.987	0.653	1.702	1.706	1.15	0.995	0.908	0.873	1.186	1.652	1.891	1.181	1.755	1.508
CPI-SS0978D28AB	NRG1_MS4A4A	simple:Q02297	simple:Q96JQ5	NRG1	MS4A4A	True	True	True	IMEx,IntAct	False	0.048	0.334	0.413	0.935	1.192	0.709	1.429	0.618	0.699	0.778	1.3	1.557	1.074	1.794	0.983	0.627	0.705	1.227	1.485	1.002	1.721	0.911
CPI-SS0735F5C3A	TIMP1_FGFR2	simple:P01033	simple:P21802	TIMP1	FGFR2	True	False	True	InnateDB-All	False	0.048	0.698	0.865	0.761	1.245	1.666	0.768	1.138	0.752	0.827	2.028	1.402	0.678	0.904	1.174	0.755	0.764	2.456	1.778	2.317	2.132	2.768
CPI-SS0178F5C45	TGFB2_TGFBR3	simple:P61812	simple:Q03167	TGFB2	TGFBR3	True	False	True	curated	False	0.05	0.586	0.703	0.53	1.026	0.643	0.759	0.435	0.587	1.082	0.771	0.361	0.887	0.564	0.715	0.446	0.462	1.21	0.416	0.58	0.696	0.524	1.019
CPI-SS09D5B5F9C	LRP1_ERFE	simple:Q07954	simple:Q4G0M1	LRP1	ERFE	True	True	False	InnateDB-All	False	0.05	0.78	0.53	1.259	1.009	0.626	0.608	1.233	0.983	0.6	0.582	1.293	1.044	0.66	0.642	1.459	1.209	0.826	0.808	1.308	1.059	0.676	0.657
CPI-SS0EBFE1854	EFNA1_EPHA4	simple:P20827	simple:P54764	EFNA1	EPHA4	True	False	True	curated	False	0.05	0.162	0.181	0.463	0.235	0.192	0.185	0.19	0.253	0.183	0.536	0.126	0.427	0.164	0.182	0.465	0.697	0.654	0.648	0.652	0.715	0.645	0.998
CPI-SS023ABAE18	XCL1_ADGRV1	simple:P47992	simple:Q8WXG9	XCL1	ADGRV1	True	False	True	InnateDB-All	False	0.05	0.391	0.697	0.808	0.7	0.717	0.689	2.077	2.188	2.079	2.096	2.069	1.247	1.358	1.25	1.267	1.239	0.783	0.894	0.785	0.802	0.774	0.388
CPI-SC0DAD29856	COL5A3_a1b1	complex	simple:P25940	complex:a1b1	complex	COL5A3	True	False	False	curated	True	0.05	0.825	0.443	0.404	0.389	0.401	1.092	0.41	0.449	0.314	0.275	0.26	0.272	0.963	0.281	0.32	0.678	0.639	0.624	0.636	1.327	0.645	0.684
CPI-SC0F4BC2909	COL6A2_a1b1	complex	simple:P12110	complex:a1b1	complex	COL6A2	True	False	False	curated	True	0.05	0.401	0.362	0.359	1.049	0.368	0.406	0.934	0.786	0.746	0.732	0.744	1.434	0.752	0.791	0.618	0.579	0.565	0.577	1.267	0.585	0.624	0.858
CPI-SS0ACD487F0	L1CAM_L1CAM	simple:P32004	simple:P32004	L1CAM	L1CAM	False	False	False	curated	False	0.05	0.174	0.15	0.276	0.156	0.179	0.15	0.253	0.156	0.276	0.253	0.379	0.259	0.282	0.156	0.259	0.139	0.162	0.179	0.156	0.282	0.162	0.184
CPI-SS0CF0E4DE9	CCL2_CCR2	simple:P13500	simple:P41597	CCL2	CCR2	True	False	True	curated	False	0.05	0.2	0.657	0.167	0.193	0.23	0.687	0.185	0.722	0.748	0.785	1.242	0.74	1.128	1.155	1.191	1.648	1.146	0.285	0.311	0.348	0.805	0.303
CPI-SS0348B76E5	CCL16_CCR1	simple:O15467	simple:P32246	CCL16	CCR1	True	False	True	curated	False	0.05	0.466	0.842	0.769	0.959	1.234	1.078	0.427	0.802	0.73	0.92	1.194	1.039	0.298	0.548	0.271	0.284	0.293	0.924	0.851	1.041	1.316	1.16
CPI-SS0CC738ABC	CXCL11_DPP4	simple:O14625	simple:P27487	CXCL11	DPP4	True	False	True	curated	False	0.05	0.48	0.76	0.682	0.914	0.265	0.32	0.651	0.301	0.313	0.932	0.362	0.853	1.085	0.647	0.702	1.034	0.684	0.696	1.314	0.745	1.236	1.468
CPI-SC0CFF5E19D	FN1_a11b1	complex	simple:P02751	complex:a11b1	complex	FN1	True	False	False	curated	True	0.052	0.538	1.139	0.126	0.541	0.113	1.143	0.13	0.78	0.352	1.382	0.369	1.718	1.29	2.319	1.307	0.547	0.119	1.149	0.136	0.568	0.139	1.169	0.156
CPI-SS0528A694B	GPR42_FAM3C	simple:O15529	simple:Q92520	GPR42	FAM3C	True	True	False	IMEx,IntAct	False	0.052	1.261	0.754	0.813	0.872	0.924	0.597	0.671	0.534	0.821	0.537	1.39	0.882	0.608	0.942	0.564	1	1.052	0.725	0.799	0.663	0.594	0.95	0.567
CPI-SS01C2BA5C8	WNT5A_FZD2	simple:P41221	simple:Q14332	WNT5A	FZD2	True	False	True	curated	False	0.052	0.589	0.441	0.555	0.67	0.513	0.491	0.225	0.076	0.191	0.305	0.149	0.127	0.263	0.115	0.229	0.344	0.187	0.165	0.197	0.163	0.277	0.121	0.099
CPI-SS0D377BBBF	ADCYAP1_DPP4	simple:P18509	simple:P27487	ADCYAP1	DPP4	True	False	True	InnateDB-All,MINT	False	0.052	0.56	0.84	0.27	0.761	0.993	2.581	2.635	2.967	2.617	2.629	3.248	2.678	3.169	3.401	0.689	0.743	1.075	0.725	0.737	1.356	0.786	1.277	1.509
CPI-SS0C62E5DD8	CXCL1_CXCR1	simple:P09341	simple:P25024	CXCL1	CXCR1	True	False	True	curated	False	0.052	3.716	2.108	2.674	2.151	2.054	1.871	0.263	0.829	0.306	1.801	0.759	2.31	0.702	1.268	0.745	0.648	1.774	0.732	2.327	0.719	1.285	0.762	0.665
CPI-SS03E7587E4	ADORA1_ENTPD1	simple:P30542	simple:P49961	ADORA1	ENTPD1	False	True	False	curated	False	0.052	0.812	0.445	0.336	0.447	0.405	0.406	0.498	0.477	0.612	0.515	0.476	0.499	1.164	0.796	0.687	0.502	0.798	0.756	0.757	0.849	0.828	0.963	0.525
CPI-SC03446A95E	FCER2_aXb2	complex	simple:P06734	complex:aXb2	complex	FCER2	True	True	False	curated	True	0.052	1.031	0.911	1.412	1.483	0.903	1.066	0.845	0.836	0.892	1.336	2.01	1.81	1.791	1.544	2.126	0.729	0.799	0.653	1.327	1.127	1.108	0.861	1.443
CPI-SS08102DC9E	CXCL1_CXCR2	simple:P09341	simple:P25025	CXCL1	CXCR2	True	False	True	curated	False	0.052	3.878	2.05	2.572	2.153	2.071	2.033	0.728	0.308	0.226	1.963	0.657	2.471	0.644	1.166	0.747	0.664	1.936	0.63	2.489	0.661	1.184	0.764	0.682
CPI-SS04C672963	ESAM_ESAM	simple:Q96AP7	simple:Q96AP7	ESAM	ESAM	False	False	False	curated	False	0.054	0.243	0.917	1.309	0.879	0.172	0.917	1.591	1.983	1.553	0.846	1.309	1.983	2.374	1.945	1.238	0.879	1.553	1.945	1.515	0.808	0.172	0.846	1.238	0.808
CPI-SS0E41702C1	IGF1_IGF1R	simple:P05019	simple:P08069	IGF1	IGF1R	True	False	True	curated	False	0.054	1.364	0.503	0.491	0.901	0.895	0.395	0.5	1.078	0.616	0.609	1.396	0.535	0.523	0.933	0.927	0.426	0.532	1.826	0.966	0.953	1.363	1.357	0.857	0.962
CPI-SC035953E6B	COL7A1_a1b1	complex	simple:Q02388	complex:a1b1	complex	COL7A1	True	False	False	curated	True	0.054	0.309	0.27	0.255	0.267	0.958	0.276	0.315	0.312	0.273	0.258	0.27	0.96	0.278	0.317	0.207	0.856	0.213	0.575	0.536	0.521	0.534	1.224	0.542	0.581
CPI-SC08B1D5269	COL5A3_a10b1	complex	simple:P25940	complex:a10b1	complex	COL5A3	True	False	False	curated	True	0.054	0.398	0.528	1.101	0.383	0.665	0.428	0.795	1.368	0.405	0.372	0.253	0.536	0.299	0.666	1.239	0.276	0.242	0.618	0.9	0.663	1.03	1.603	0.64	0.607
CPI-SS02D7A1DDE	KIT_KITLG	simple:P10721	simple:P21583	KIT	KITLG	True	True	False	curated	False	0.054	0.105	0.112	0.119	0.339	0.524	0.112	0.162	0.169	0.175	0.395	0.58	0.168	1.683	1.69	1.696	1.916	2.101	1.689	0.853	0.86	0.867	1.087	1.272	0.859
CPI-SC090855C8E	FN1_aVb3	complex	simple:P02751	complex:aVb3	complex	FN1	True	False	False	curated	True	0.054	0.204	0.143	0.441	0.112	0.208	0.147	0.445	0.116	0.447	0.386	0.684	0.355	1.384	1.324	1.622	1.292	0.214	0.153	0.451	0.122	0.234	0.173	0.471	0.142
CPI-SS0638E0E29	CCR10_CCL7	simple:P46092	simple:P80098	CCR10	CCL7	True	True	False	I2D	False	0.054	0.313	0.198	0.216	1.007	0.291	0.176	0.194	0.986	0.806	0.691	0.709	1.5	0.315	0.2	0.218	1.009	1.401	1.286	1.304	2.096	0.331	0.217	0.235	1.026
CPI-SS047232C64	DLL1_NOTCH3	simple:O00548	simple:Q9UM47	DLL1	NOTCH3	False	False	True	curated	False	0.054	0.232	0.411	0.534	0.232	0.837	0.43	1.025	1.204	1.327	1.025	1.63	1.223	0.224	0.403	0.525	0.224	0.828	0.421	0.831	1.01	1.133	0.831	1.435	1.028
CPI-SC08B6B74FB	FN1_a2Bb3	complex	simple:P02751	complex:a2Bb3	complex	FN1	True	False	False	curated	True	0.054	0.204	0.143	0.441	0.112	0.208	0.147	0.445	0.116	0.447	0.386	0.684	0.355	1.384	1.324	1.622	1.292	0.214	0.153	0.451	0.122	0.234	0.173	0.471	0.142
CPI-SS0FF51A757	TNFSF18_TNFRSF18	simple:Q9UNG2	simple:Q9Y5U5	TNFSF18	TNFRSF18	True	False	True	curated	False	0.054	0.279	0.399	1.458	0.274	0.925	1.692	0.494	0.345	0.554	0.43	0.375	0.31	0.614	0.735	1.794	0.61	1.26	2.028	0.83	0.68	0.89	0.765	0.71	0.646
CPI-SS0B89DD8C1	TNFSF13_TNFRSF17	simple:O75888	simple:Q02223	TNFSF13	TNFRSF17	True	False	True	curated	False	0.054	0.538	0.756	1.208	0.264	0.512	0.73	1.182	0.238	0.394	0.611	1.064	0.12	0.492	0.709	1.162	0.218	0.441	0.659	1.111	0.167	0.45	0.667	1.12	0.176
CPI-SS0DCA69916	TNFRSF13B_TNFSF13	simple:O14836	simple:O75888	TNFRSF13B	TNFSF13	True	True	False	curated	False	0.054	1.103	1.076	0.958	1.056	1.006	1.014	0.241	0.215	0.097	0.195	0.144	0.153	0.263	0.236	0.118	0.216	0.166	0.174	0.918	0.892	0.773	0.871	0.821	0.829
CPI-SS0B2D5BA95	WNT5A_FZD1	simple:P41221	simple:Q9UP38	WNT5A	FZD1	True	False	True	curated	False	0.054	0.456	0.517	0.629	0.878	0.456	0.732	0.091	0.153	0.264	0.513	0.091	0.368	0.129	0.191	0.302	0.552	0.13	0.406	0.063	0.125	0.236	0.485	0.063	0.34
CPI-SS016B7C7D6	BMP2_SMO	simple:P12643	simple:Q99835	BMP2	SMO	True	False	True	I2D	False	0.054	0.405	0.145	0.44	0.376	0.116	0.411	0.381	0.121	0.416	1.321	1.061	1.356	0.487	0.227	0.522	0.4	0.14	0.435	0.797	0.537	0.832	0.391	0.13	0.425
CPI-CS0BA342294	IL17	receptor	AE_IL17C	complex:IL17	receptor	AE	simple:Q9P0M4	IL17C	True	True	False	curated	False	0.054	0.17	0.194	0.241	0.195	0.243	0.243	0.77	0.793	0.763	0.841	0.712	0.741	0.348	0.372	0.341	0.419	0.29	0.319	0.711	0.734	0.704	0.782	0.653	0.682
CPI-SC092C3E4DF	FN1_a8b1	complex	simple:P02751	complex:a8b1	complex	FN1	True	False	False	curated	True	0.054	0.096	0.427	1.152	0.128	0.1	0.431	1.156	0.132	0.339	0.67	1.395	0.371	1.277	1.608	2.332	1.308	0.106	0.437	1.162	0.138	0.126	0.458	1.182	0.158
CPI-SS082ABF1EA	EFNB2_EPHB3	simple:P52799	simple:P54753	EFNB2	EPHB3	False	True	True	curated	False	0.054	0.12	0.205	0.257	0.13	0.216	0.268	0.25	0.336	0.388	1.205	1.291	1.343	0.117	0.203	0.255	0.097	0.183	0.235	0.139	0.225	0.277	0.095	0.181	0.233
CPI-SC0C9CBDD21	COL27A1_a10b1	complex	simple:Q8IZC6	complex:a10b1	complex	COL27A1	True	False	False	curated	True	0.054	0.487	0.769	0.532	0.899	1.473	0.51	0.476	0.455	0.218	0.585	1.158	0.195	0.436	0.566	1.139	0.401	0.531	1.104	0.406	0.536	1.11	0.4	0.53	1.104
CPI-SC062D34C2A	VCAM1_a9b1	complex	simple:P19320	complex:a9b1	complex	VCAM1	False	False	False	curated	True	0.054	0.66	0.891	0.65	0.861	1.199	0.377	0.347	0.686	0.385	0.356	0.694	0.327	0.558	0.317	0.528	0.866	0.503	0.474	0.812	1.562	1.792	1.552	1.763	2.101
CPI-SS0C2437E0D	CXCL13_CXCR5	simple:O43927	simple:P32302	CXCL13	CXCR5	True	False	True	curated	False	0.057	0.28	1.162	0.271	0.683	0.747	0.482	0.288	0.265	1.147	0.256	0.668	0.732	0.467	0.273	1.57	2.452	1.561	1.973	2.037	1.772	1.578	1.05	0.571	0.635	0.37
CPI-SS0B8083B44	WNT7B_FZD4	simple:P56706	simple:Q9ULV1	WNT7B	FZD4	True	False	True	curated	False	0.057	0.118	0.333	1.42	0.138	0.139	0.116	0.332	1.419	0.137	0.138	0.979	1.194	2.281	0.999	1	0.185	0.4	1.487	0.205	0.206	0.23	0.446	1.533	0.251	0.252
CPI-SC05992FDC8	COL5A1_a1b1	complex	simple:P20908	complex:a1b1	complex	COL5A1	True	False	False	curated	True	0.057	0.821	0.829	0.875	0.693	0.654	0.639	0.651	1.342	0.66	0.698	0.812	0.353	0.314	0.3	0.312	1.002	0.32	0.359	0.772	0.733	0.719	0.731	1.421	0.739	0.778
CPI-SS0D1AE5C79	FGFR3_EPHA4	simple:P22607	simple:P54764	FGFR3	EPHA4	True	True	True	I2D,InnateDB-All	False	0.057	0.152	0.17	0.452	0.893	0.85	0.843	0.847	0.911	0.84	1.193	0.202	0.159	0.152	0.22	0.503	0.72	0.677	0.671	0.675	0.738	0.668	1.021	0.156	0.174	0.457
CPI-SS0CB6968B9	FGF2_FGFRL1	simple:P09038	simple:Q8N441	FGF2	FGFRL1	True	False	True	I2D	False	0.057	0.846	0.632	0.65	0.827	0.673	0.715	0.966	0.67	0.743	0.933	0.715	0.727	1.343	0.444	0.248	0.425	0.271	0.313	0.564	0.268	0.341	0.531	0.314	0.325	0.941
CPI-SC07B4ED8C9	IFNL1_Type	III	IFNR	simple:Q8IU54	complex:Type	III	IFNR	IFNL1	True	False	True	curated	False	0.057	0.795	0.208	1.297	0.445	0.25	0.925	0.338	1.427	0.575	0.38	1.016	0.429	1.518	0.667	0.471	0.74	1.241	0.39	0.195	0.699	1.201	0.35	0.695	1.197	0.345
CPI-SS046F6F0C1	EFNA1_EPHA2	simple:P20827	simple:P29317	EFNA1	EPHA2	True	False	True	curated	False	0.057	0.12	0.499	1.004	0.517	0.187	0.193	0.571	1.077	0.59	0.26	0.084	0.462	0.968	0.481	0.151	0.122	0.5	1.006	0.519	0.189	0.655	1.033	1.539	1.052	0.722
CPI-SC047CEF2DD	CRLF2_TSLPR	simple:Q9HC73	complex:TSLPR	CRLF2	True	True	True	curated	False	0.057	2.236	1.208	1.278	1.414	1.339	1.208	0.179	0.25	0.386	0.31	1.278	0.25	0.321	0.457	0.381	1.414	0.386	0.457	0.593	0.517	1.339	0.31	0.381	0.517	0.441
CPI-SS05F45873A	SAA1_FPR2	simple:P0DJI8	simple:P25090	SAA1	FPR2	True	False	True	guidetopharmacology.org	False	0.057	1.02	0.445	0.98	0.429	0.604	1.09	0.516	0.218	1.051	0.5	0.675	0.651	1.602	1.027	0.729	1.562	1.012	1.186	0.402	1.353	0.778	0.48	1.313	0.762	0.937
CPI-SS0F6B529A1	CCL5_CCR3	simple:P13501	simple:P51677	CCL5	CCR3	True	False	True	curated	False	0.057	2.172	2.816	2.347	2.146	1.296	1.94	1.47	1.27	1.511	2.154	1.685	1.485	2.296	2.94	2.47	2.27	1.499	1.592	2.236	1.766	1.566	1.689	2.333	1.863	1.663
CPI-SS0D46E2B45	TGFB3_TGFBR3	simple:P10600	simple:Q03167	TGFB3	TGFBR3	True	False	True	curated	False	0.057	0.63	0.746	0.573	1.069	0.63	0.746	0.574	1.069	0.653	0.769	0.446	0.597	1.092	0.673	0.789	0.465	0.617	1.112	0.771	0.887	0.564	0.715	0.446	0.462	1.21
CPI-SC0FC645961	COL5A3_a2b1	complex	simple:P25940	complex:a2b1	complex	COL5A3	True	False	False	curated	True	0.057	0.219	0.733	0.267	0.254	0.486	0.4	0.435	1	0.533	0.521	0.44	0.357	0.27	0.306	0.871	0.404	0.392	0.311	0.721	0.634	0.67	1.235	0.768	0.756	0.675
CPI-SS0F2C6A4D4	FGF18_FGFR1	simple:O76093	simple:P11362	FGF18	FGFR1	True	False	True	I2D	False	0.057	0.267	0.358	0.321	0.615	0.65	0.42	0.43	1.189	0.557	0.485	0.314	0.571	0.606	0.376	0.386	1.145	0.513	0.442	0.533	0.569	0.339	0.348	1.108	0.476	0.404
CPI-CS0AB19226A	PlexinA4_complex1_SEMA3A	complex:PlexinA4_complex1	simple:Q14563	SEMA3A	True	True	False	curated	False	0.057	0.162	0.607	0.384	0.177	0.256	1.189	1.633	1.411	1.204	1.283	0.512	0.956	0.734	0.526	0.606	0.476	0.92	0.698	0.49	0.57	0.237	0.682	0.46	0.252	0.331
CPI-SC0EACF2D60	COL26A1_a1b1	complex	simple:Q96A83	complex:a1b1	complex	COL26A1	True	False	False	curated	True	0.057	0.206	0.167	0.855	0.173	0.212	0.677	0.638	0.623	0.635	1.326	0.644	0.683	0.503	0.464	0.449	0.461	1.152	0.47	0.509	0.211	0.172	0.169	0.86	0.178	0.217
CPI-SS00689751B	PRL_PRLR	simple:P01236	simple:P16471	PRL	PRLR	True	False	True	I2D,IMEx,InnateDB,IntAct	False	0.059	0.289	0.284	0.745	0.644	0.589	0.329	0.729	0.544	0.443	0.388	0.128	0.528	0.224	0.219	0.68	0.58	0.524	0.264	0.664	0.373	0.368	0.829	0.728	0.673	0.413	0.813
CPI-SS07A0F4D73	FGFR1_FGF23	simple:P11362	simple:Q9GZV9	FGFR1	FGF23	True	True	False	IMEx,InnateDB-All	False	0.059	0.58	0.274	0.615	0.532	0.364	0.706	0.327	0.668	0.553	0.306	0.647	0.579	0.621	0.962	0.657	0.998	0.426	0.768	0.436	0.777	1.195	1.537	0.563	0.905	0.492	0.833
CPI-SS041751A4D	CCR1_CCL18	simple:P32246	simple:P55774	CCR1	CCL18	True	True	False	guidetopharmacology.org	False	0.059	0.678	1.191	0.396	0.928	1.442	0.651	1.165	0.664	1.177	0.673	1.186	0.771	1.304	1.817	0.699	1.231	1.744	0.889	1.421	1.935	1.163	1.696	2.209	1.008	1.54	2.054
CPI-SC090DB3159	COL24A1_a1b1	complex	simple:Q17RW2	complex:a1b1	complex	COL24A1	True	False	False	curated	True	0.059	0.236	0.197	0.194	0.884	0.203	0.241	0.89	0.851	0.836	0.848	1.539	0.857	0.896	0.625	0.586	0.571	0.583	1.274	0.592	0.631	0.249	0.21	0.207	0.898	0.216	0.254
CPI-SC02017BE74	COL4A2_a11b1	complex	simple:P08572	complex:a11b1	complex	COL4A2	True	False	False	curated	True	0.059	0.569	0.141	1.17	0.158	0.531	0.103	1.133	0.12	0.503	1.104	0.543	0.114	1.144	0.131	0.582	0.154	1.184	0.171	1.083	0.655	1.684	0.672	0.729	0.3	1.33	0.317
CPI-SS07DFEBFA8	GPR19_ENHO	simple:Q15760	simple:Q6UWT2	GPR19	ENHO	True	True	False	guidetopharmacology.org	False	0.059	0.171	0.163	0.306	0.163	1.112	1.104	1.246	1.103	0.614	0.606	0.748	0.605	0.241	0.236	0.22	0.212	0.355	0.212	0.166	0.158	0.301	0.157	0.138	0.13	0.273	0.129
CPI-SC02AE206BE	COL6A3_a1b1	complex	simple:P12111	complex:a1b1	complex	COL6A3	True	False	False	curated	True	0.059	0.824	0.181	0.349	0.31	0.296	0.308	0.998	0.316	0.355	0.834	0.795	0.78	0.792	1.483	0.801	0.839	0.4	0.361	0.347	0.359	1.049	0.367	0.406	0.175	0.824	0.181
CPI-SC039D075C6	COL15A1_a2b1	complex	simple:P39059	complex:a2b1	complex	COL15A1	True	False	False	curated	True	0.059	0.583	0.497	0.532	1.098	0.631	0.618	0.538	1.25	1.164	1.199	1.765	1.298	1.285	1.204	0.259	0.173	0.208	0.774	0.307	0.294	0.213	0.211	0.726	0.259	0.246	0.165
CPI-SC0814068D9	COL6A2_a2b1	complex	simple:P12110	complex:a2b1	complex	COL6A2	True	False	False	curated	True	0.059	0.443	0.357	0.393	0.958	0.491	0.479	0.398	0.843	0.376	0.364	0.828	0.742	0.777	1.343	0.876	0.864	0.783	0.661	0.575	0.61	1.176	0.709	0.696	0.615	0.767	0.3
CPI-SS0D04AE221	CXCL3_CXCR1	simple:P19876	simple:P25024	CXCL3	CXCR1	True	False	True	I2D	False	0.061	1.785	0.743	2.28	0.672	1.238	0.715	0.618	2.511	0.903	1.469	0.945	0.849	2.122	0.514	1.08	0.556	0.46	2.028	0.42	0.986	0.463	0.366	2.599	0.991	1.557	1.034	0.937
CPI-SS0DBA4D668	DPP4_CXCL12	simple:P27487	simple:P48061	DPP4	CXCL12	True	True	False	curated	False	0.061	0.587	1.097	0.642	1.152	0.482	0.56	0.973	1.484	0.623	1.134	0.635	1.146	0.762	0.84	1.254	1.764	0.271	0.684	1.195	0.683	0.762	1.175	1.685	0.915	0.994	1.407	1.918
CPI-SS09FAC4977	CXCL11_CXCR3	simple:O14625	simple:P49682	CXCL11	CXCR3	True	False	True	curated	False	0.061	0.258	0.454	1.826	0.332	0.687	0.339	0.429	0.274	0.421	0.626	1.997	0.503	0.301	0.858	0.511	0.343	0.812	0.657	0.804	1.009	2.38	0.678	0.886	0.684	1.241	0.894	0.726
CPI-SS042EB8C7A	TBXA2R_GHRL	simple:P21731	simple:Q9UBU3	TBXA2R	GHRL	True	True	False	InnateDB-All	False	0.061	0.514	0.516	0.571	0.954	1.327	0.708	0.505	0.515	0.589	0.518	0.507	0.136	0.519	0.892	0.273	0.154	0.641	0.643	0.698	1.081	1.454	0.835	0.631	0.642	0.716	0.645	0.634
CPI-SS09185EA8F	CXCL3_CXCR2	simple:P19876	simple:P25025	CXCL3	CXCR2	True	False	True	curated	False	0.061	1.947	0.642	2.441	0.614	1.136	0.717	0.634	2.672	0.845	1.367	0.948	0.865	2.283	0.456	0.978	0.559	0.476	2.19	0.362	0.884	0.465	0.383	2.761	0.933	1.455	1.036	0.954
CPI-SS04CD88411	GPR1_RARRES2	simple:P46091	simple:Q99969	GPR1	RARRES2	True	True	False	guidetopharmacology.org	False	0.061	0.351	0.337	1.942	0.393	1.024	0.681	0.645	0.113	1.703	0.154	0.785	0.443	0.407	0.224	0.211	1.815	0.266	0.897	0.554	0.518	0.134	0.12	1.724	0.175	0.806	0.463	0.428
CPI-SS0F52745F3	DPP4_CXCL9	simple:P27487	simple:Q07325	DPP4	CXCL9	True	True	False	curated	False	0.061	0.992	0.315	1.677	1.047	0.37	1.732	1.379	0.702	2.064	1.029	0.352	1.713	1.04	0.364	1.725	1.659	0.982	2.344	1.09	0.413	1.774	1.58	0.904	2.265	1.813	1.136	2.497
CPI-SC08E75294D	COL15A1_a10b1	complex	simple:P39059	complex:a10b1	complex	COL15A1	True	False	False	curated	True	0.061	0.48	0.762	0.525	0.892	1.466	0.503	0.469	1.147	1.429	1.192	1.559	2.133	1.17	1.136	0.156	0.438	0.201	0.568	1.141	0.179	0.145	0.108	0.39	0.153	0.52	1.094	0.131
CPI-SC0755598EE	THBS1_aVb3	complex	simple:P07996	complex:aVb3	complex	THBS1	False	False	False	curated	True	0.061	0.489	0.437	0.467	0.505	0.479	0.453	0.446	0.461	1.39	1.33	1.628	1.298	0.573	0.513	0.811	0.482	1.972	1.911	2.209	1.88	0.443	0.382	0.68	1.767	1.706	2.004	1.675
CPI-SC053BBE2B1	COL16A1_a1b1	complex	simple:Q07092	complex:a1b1	complex	COL16A1	True	False	False	curated	True	0.061	0.418	0.379	0.364	0.376	1.067	0.385	0.424	0.44	0.401	0.386	0.398	1.089	0.407	0.446	0.553	0.514	0.499	0.512	1.202	0.52	0.559	0.224	0.185	0.182	0.873	0.191	0.23
CPI-SS032AD1183	NPPA_NPR1	simple:P01160	simple:P16066	NPPA	NPR1	True	False	True	guidetopharmacology.org	False	0.061	0.3	1.126	0.739	1.103	0.288	0.292	0.298	0.082	0.909	0.521	0.886	0.07	0.081	0.224	1.051	0.663	1.028	0.212	0.216	0.222	0.237	1.063	0.676	1.041	0.225	0.229	0.235
CPI-SC0200AC9E3	THBS1_a2Bb3	complex	simple:P07996	complex:a2Bb3	complex	THBS1	False	False	False	curated	True	0.061	0.489	0.437	0.467	0.505	0.479	0.453	0.446	0.461	1.39	1.33	1.628	1.298	0.573	0.513	0.811	0.482	1.972	1.911	2.209	1.88	0.443	0.382	0.68	1.767	1.706	2.004	1.675
CPI-SC0CE851065	COL6A2_a10b1	complex	simple:P12110	complex:a10b1	complex	COL6A2	True	False	False	curated	True	0.061	0.34	0.622	0.386	0.752	1.326	0.363	0.329	0.507	0.637	1.211	0.725	1.007	0.77	1.137	1.711	0.748	0.714	0.558	0.84	0.603	0.97	1.543	0.581	0.547	0.431	0.561	1.135
CPI-CS00BF6CD40	IL13	receptor_IL4	complex:IL13	receptor	simple:P05112	IL4	True	True	False	curated	False	0.061	0.309	0.525	0.359	0.383	0.291	0.589	0.423	0.447	0.504	0.338	0.362	0.283	0.786	0.62	0.644	0.843	0.678	0.702	0.61	0.444	0.468	0.775	0.609	0.633	0.576	0.41	0.434
CPI-SS01A6823FA	PF4_CXCR3	simple:P02776	simple:P49682	PF4	CXCR3	True	False	True	curated	False	0.063	0.319	0.31	0.515	1.887	0.393	0.748	0.4	0.232	0.401	0.393	0.598	1.969	0.476	0.274	0.83	0.483	0.315	0.593	0.438	0.585	0.79	2.161	0.459	0.667	0.466	1.022	0.675	0.507
CPI-SC0C3E2D267	F10_aMb2	complex	simple:P00742	complex:aMb2	complex	F10	True	False	False	curated	True	0.063	0.32	0.609	0.472	0.418	0.986	0.448	0.647	0.382	0.283	0.671	0.534	0.481	1.048	0.511	0.709	0.325	0.364	0.575	0.476	0.419	0.335	0.389	0.864	0.727	0.674	1.241	0.704	0.903
CPI-SS04EE957D8	CCR1_CCL26	simple:P32246	simple:Q9Y258	CCR1	CCL26	True	True	False	curated	False	0.063	0.524	0.45	0.376	0.775	0.378	0.498	0.51	0.519	0.825	0.751	1.15	0.753	0.752	0.678	1.077	0.68	0.943	0.869	1.268	0.871	1.217	1.143	1.542	1.145	1.062	0.988	1.387	0.99
CPI-SS08B249DBA	CCL2_CCR10	simple:P13500	simple:P46092	CCL2	CCR10	True	False	True	I2D	False	0.063	0.636	0.145	1.231	0.161	0.173	0.151	0.666	0.175	1.261	0.192	0.728	0.706	1.221	0.73	1.816	0.747	1.134	1.113	1.627	1.136	2.223	1.153	0.291	0.269	0.784	0.293	1.379	0.31
CPI-CS085EF890A	ACVR_1B2B	receptor_INHBB	complex:ACVR_1B2B	receptor	simple:P09529	INHBB	True	True	False	curated	False	0.063	0.436	0.589	0.378	0.138	0.291	0.535	0.688	0.477	0.739	0.892	0.681	0.242	0.395	0.184	0.27	0.423	0.212	0.149	0.302	0.091	0.222	0.375	0.164	0.211	0.364	0.153	0.138	0.291
CPI-SC0082A7233	COL4A4_a11b1	complex	simple:P53420	complex:a11b1	complex	COL4A4	True	False	False	curated	True	0.063	1.191	0.763	1.792	0.78	1.226	0.798	1.828	0.815	0.644	0.216	1.245	0.233	0.519	1.12	0.107	1.082	0.654	1.683	0.671	0.837	0.408	1.438	0.425	0.515	1.116	0.103	0.507	1.109
CPI-CS0A5400A6A	ACVR_1C2B	receptor_INHBB	complex:ACVR_1C2B	receptor	simple:P09529	INHBB	True	True	False	curated	False	0.063	0.436	0.589	0.378	0.138	0.291	0.535	0.688	0.477	0.739	0.892	0.681	0.242	0.395	0.184	0.27	0.423	0.212	0.149	0.302	0.091	0.222	0.375	0.164	0.211	0.364	0.153	0.138	0.291
CPI-SS0FF49C823	EFNA1_EPHA1	simple:P20827	simple:P21709	EFNA1	EPHA1	True	False	True	curated	False	0.063	0.401	0.34	0.222	0.258	0.317	0.127	0.473	0.413	0.294	0.331	0.39	0.2	0.364	0.304	0.185	0.222	0.281	0.402	0.342	0.223	0.26	0.319	0.936	0.875	0.756	0.793	0.852	0.662
CPI-SS026776C89	HLA-DQB2_PRL	simple:HLADQB2	simple:P01236	HLA-DQB2	PRL	True	True	False	InnateDB-All	False	0.063	0.297	0.097	0.233	0.381	0.458	0.257	0.393	0.541	1.142	0.941	1.077	1.226	0.457	0.257	0.393	0.541	0.469	0.268	0.405	0.553	0.664	0.463	0.599	0.747	0.355	0.154	0.29	0.439
CPI-SC006E22794	COL1A2_a1b1	complex	simple:P08123	complex:a1b1	complex	COL1A2	True	False	False	curated	True	0.063	0.429	0.39	0.375	0.387	1.077	0.396	0.434	0.405	0.366	0.351	0.363	1.053	0.372	0.41	0.231	0.192	0.189	0.88	0.198	0.237	0.805	0.297	0.258	0.243	0.255	0.946	0.264	0.303
CPI-SC069F95780	COL8A2_a1b1	complex	simple:P25067	complex:a1b1	complex	COL8A2	True	False	False	curated	True	0.063	0.226	0.187	0.185	0.875	0.193	0.232	0.332	0.293	0.278	0.29	0.981	0.299	0.338	0.248	0.209	0.194	0.206	0.896	0.215	0.253	0.383	0.344	0.329	0.341	1.032	0.35	0.389	0.795
CPI-SC0F778DC8E	COL9A3_a1b1	complex	simple:Q14050	complex:a1b1	complex	COL9A3	True	False	False	curated	True	0.063	0.755	0.716	0.701	0.713	1.404	0.722	0.76	0.354	0.315	0.3	0.312	1.003	0.321	0.36	0.263	0.224	0.21	0.222	0.912	0.23	0.269	0.547	0.508	0.494	0.506	1.196	0.514	0.553
CPI-SC0147A8A42	COL26A1_a10b1	complex	simple:Q96A83	complex:a10b1	complex	COL26A1	True	False	False	curated	True	0.063	0.146	0.428	0.191	0.558	1.131	0.169	0.135	0.616	0.898	0.662	1.028	1.602	0.639	0.605	0.442	0.725	0.488	0.855	1.428	0.465	0.431	0.151	0.433	0.196	0.563	1.136	0.173	0.14
CPI-SC090311934	COL24A1_a10b1	complex	simple:Q17RW2	complex:a10b1	complex	COL24A1	True	False	False	curated	True	0.063	0.175	0.457	0.221	0.587	1.161	0.198	0.164	0.83	1.112	0.875	1.242	1.815	0.852	0.819	0.564	0.847	0.61	0.977	1.55	0.587	0.553	0.188	0.47	0.234	0.6	1.174	0.211	0.177
CPI-SS015E1E2C6	SELP_CD34	simple:P16109	simple:P28906	SELP	CD34	False	False	False	curated	False	0.063	0.133	0.251	0.159	0.183	0.195	0.119	0.243	0.152	0.176	0.188	0.716	0.834	0.742	0.766	0.778	0.702	0.348	0.466	0.375	0.398	0.41	0.335	0.143	0.261	0.17	0.193	0.205	0.13
CPI-SC0517A327B	COL9A3_a10b1	complex	simple:Q14050	complex:a10b1	complex	COL9A3	True	False	False	curated	True	0.063	0.694	0.976	0.74	1.106	1.68	0.717	0.683	0.293	0.575	0.339	0.705	1.279	0.316	0.282	0.203	0.485	0.248	0.615	1.189	0.226	0.192	0.487	0.769	0.532	0.899	1.473	0.51	0.476
CPI-SC0EB600CAC	COL24A1_a2b1	complex	simple:Q17RW2	complex:a2b1	complex	COL24A1	True	False	False	curated	True	0.063	0.278	0.192	0.228	0.793	0.326	0.314	0.233	0.933	0.847	0.882	1.447	0.98	0.968	0.887	0.668	0.581	0.617	1.182	0.715	0.703	0.622	0.291	0.205	0.241	0.806	0.339	0.327	0.246
CPI-SC01F1F24AA	COL9A3_a2b1	complex	simple:Q14050	complex:a2b1	complex	COL9A3	True	False	False	curated	True	0.063	0.797	0.711	0.747	1.312	0.845	0.833	0.752	0.396	0.31	0.346	0.911	0.444	0.432	0.351	0.306	0.22	0.255	0.821	0.354	0.341	0.26	0.59	0.504	0.539	1.105	0.638	0.625	0.544
CPI-SC01E9FAC20	COL16A1_a2b1	complex	simple:Q07092	complex:a2b1	complex	COL16A1	True	False	False	curated	True	0.063	0.46	0.374	0.41	0.975	0.508	0.496	0.415	0.483	0.396	0.432	0.997	0.53	0.518	0.437	0.596	0.51	0.545	1.11	0.644	0.631	0.55	0.267	0.18	0.216	0.781	0.314	0.302	0.221
CPI-SS0D81C6C1D	WNT7B_FZD1	simple:P56706	simple:Q9UP38	WNT7B	FZD1	True	False	True	curated	False	0.063	0.103	0.164	0.276	0.525	0.103	0.379	0.163	0.274	0.524	0.378	0.964	1.025	1.136	1.386	0.964	1.24	0.17	0.231	0.342	0.592	0.17	0.446	0.215	0.277	0.388	0.637	0.216	0.492
CPI-SC08A98E7D4	COL7A1_a2b1	complex	simple:Q02388	complex:a2b1	complex	COL7A1	True	False	False	curated	True	0.063	0.351	0.265	0.301	0.866	0.399	0.387	0.306	0.354	0.268	0.303	0.869	0.402	0.39	0.309	0.25	0.164	0.199	0.765	0.298	0.285	0.204	0.618	0.532	0.567	1.133	0.666	0.653	0.572
CPI-SS03E48EFEA	C3_C3AR1	simple:P01024	simple:Q16581	C3	C3AR1	True	False	True	guidetopharmacology.org	False	0.063	0.409	0.881	0.99	0.732	1.013	0.88	0.761	0.989	0.794	0.745	0.751	0.757	1.461	1.57	1.312	1.593	1.46	0.604	0.832	0.637	0.588	0.594	0.6	1.304	1.413	1.155	1.436	1.303
CPI-SC0CE6F5084	COL27A1_a2b1	complex	simple:Q8IZC6	complex:a2b1	complex	COL27A1	True	False	False	curated	True	0.063	0.59	0.504	0.539	1.105	0.638	0.625	0.544	0.276	0.79	0.323	0.311	0.23	0.257	0.771	0.305	0.292	0.222	0.736	0.269	0.257	0.227	0.742	0.275	0.263	0.221	0.736	0.269	0.256
CPI-SS072B19293	HLA-DPA1_GAL	simple:HLADPA1	simple:P22466	HLA-DPA1	GAL	True	True	False	InnateDB-All	False	0.063	1.786	1.49	2.361	2.065	3.071	2.775	1.554	1.258	1.604	1.307	2.246	1.95	1.119	1.538	1.242	1.197	1.331	1.266	2.479	2.182	2.764	2.468	1.558	1.262	2.534	2.238	1.909	1.613
CPI-CS048465560	ACVR_1A2B	receptor_INHBB	complex:ACVR_1A2B	receptor	simple:P09529	INHBB	True	True	False	curated	False	0.063	0.436	0.589	0.378	0.138	0.291	0.535	0.688	0.477	0.739	0.892	0.681	0.242	0.395	0.184	0.27	0.423	0.212	0.149	0.302	0.091	0.222	0.375	0.164	0.211	0.364	0.153	0.138	0.291
CPI-SS01F67987A	FGF2_FGFR1	simple:P09038	simple:P11362	FGF2	FGFR1	True	False	True	curated	False	0.063	0.661	0.696	0.613	0.787	0.749	0.634	0.728	0.66	1.043	1.079	0.849	0.858	1.618	0.986	0.914	0.259	0.294	0.385	0.347	0.326	0.258	0.641	0.677	0.447	0.456	1.216	0.584	0.512
CPI-SS00D9A2FD0	IAPP_CALCR	simple:P10997	simple:P30988	IAPP	CALCR	True	False	True	guidetopharmacology.org	False	0.063	0.282	0.114	0.302	0.217	0.321	0.152	0.341	0.256	0.309	0.14	0.329	0.244	0.295	0.126	0.315	0.23	0.273	0.104	0.293	0.208	0.363	0.194	0.383	0.298	0.299	0.13	0.318	0.234
CPI-SS0241A1F57	NRP2_SEMA3C	simple:O60462	simple:Q99985	NRP2	SEMA3C	True	True	False	curated	False	0.063	0.486	0.454	0.808	0.396	0.472	0.685	0.653	1.007	0.595	0.315	0.67	1.367	1.334	1.689	1.277	0.996	1.352	1.114	1.082	1.436	1.024	0.744	1.1	0.512	0.48	0.834	0.422	0.498
CPI-SC008F4294F	COL7A1_a10b1	complex	simple:Q02388	complex:a10b1	complex	COL7A1	True	False	False	curated	True	0.063	0.248	0.53	0.294	0.66	1.234	0.271	0.237	0.251	0.533	0.296	0.663	1.237	0.274	0.24	0.147	0.429	0.192	0.559	1.133	0.17	0.136	0.515	0.797	0.56	0.927	1.5	0.538	0.504
CPI-SC0F94B2CF9	COL16A1_a10b1	complex	simple:Q07092	complex:a10b1	complex	COL16A1	True	False	False	curated	True	0.063	0.357	0.639	0.403	0.77	1.343	0.38	0.346	0.379	0.662	0.425	0.792	1.365	0.402	0.368	0.493	0.775	0.538	0.905	1.478	0.516	0.482	0.164	0.446	0.209	0.576	1.149	0.186	0.153
CPI-SS0D22A09AD	NRP2_PGF	simple:O60462	simple:P49763	NRP2	PGF	True	True	False	curated	False	0.063	0.155	0.201	0.127	0.173	0.353	0.317	0.4	0.325	0.371	0.319	1.035	0.999	1.082	1.007	1.053	1	0.783	0.747	0.829	0.755	0.801	0.748	0.181	0.145	0.227	0.153	0.199	0.146
CPI-SC0AD6D8724	COL26A1_a2b1	complex	simple:Q96A83	complex:a2b1	complex	COL26A1	True	False	False	curated	True	0.063	0.249	0.163	0.198	0.764	0.297	0.284	0.203	0.719	0.633	0.669	1.234	0.767	0.755	0.674	0.546	0.459	0.495	1.06	0.593	0.581	0.5	0.254	0.168	0.203	0.768	0.301	0.289	0.208
CPI-SS008F83E02	CCL4_GPRC5D	simple:P13236	simple:Q9NZD1	CCL4	GPRC5D	True	False	True	IMEx,IntAct	False	0.066	1.876	1.894	2.475	1.866	1.773	1.791	2.372	1.764	2.133	2.151	2.732	2.124	1.63	1.648	2.229	1.62	2.371	2.389	2.97	2.362	1.978	1.996	2.577	1.969	1.408	1.657	1.675	2.256	1.647
CPI-SS03A3EE72E	FLT4_PDGFC	simple:P35916	simple:Q9NRA1	FLT4	PDGFC	True	True	False	guidetopharmacology.org	False	0.066	0.301	0.385	0.422	0.547	0.238	0.519	0.7	0.357	1.032	0.345	0.228	0.313	0.349	0.474	0.447	0.628	0.284	0.959	0.272	0.671	0.756	0.793	0.918	0.608	0.89	1.071	0.727	1.403	0.715
CPI-CS0C8F1E01F	ACVR_1B2A	receptor_BMP3	complex:ACVR_1B2A	receptor	simple:P12645	BMP3	True	True	False	curated	False	0.066	0.783	0.17	0.737	0.124	0.752	0.139	0.863	0.25	0.202	0.753	0.782	0.17	0.968	0.356	0.307	0.774	0.162	0.8	0.187	0.139	0.783	0.171	0.753	0.141	0.846	0.234	0.185	0.76	0.147
CPI-SC0847A64D2	FN1_aVb5	complex	simple:P02751	complex:aVb5	complex	FN1	True	False	False	curated	True	0.066	0.195	0.214	0.509	0.789	0.124	0.199	0.218	0.513	0.793	0.363	0.438	0.457	0.752	1.032	1.3	1.375	1.394	1.69	1.969	0.13	0.205	0.224	0.519	0.799	0.15	0.225	0.244	0.54	0.819
CPI-SC08D8A859F	COL6A1_a2b1	complex	simple:P12109	complex:a2b1	complex	COL6A1	True	False	False	curated	True	0.066	0.231	0.746	0.279	0.266	0.185	0.38	0.294	0.33	0.895	0.428	0.416	0.335	0.442	0.356	0.392	0.957	0.49	0.478	0.397	0.222	0.737	0.27	0.258	0.177	0.215	0.73	0.263	0.251	0.17
CPI-SS091B461CB	ACKR2_CCL28	simple:O00590	simple:Q9NRJ3	ACKR2	CCL28	True	True	False	I2D	False	0.066	0.492	0.93	1.118	0.703	0.479	0.869	0.637	0.583	1.085	0.573	0.561	0.396	0.998	1.187	0.772	0.548	0.938	0.706	0.652	1.154	0.642	0.762	0.951	0.536	0.702	0.47	0.416	0.918	0.406
CPI-SC02B111AB0	COL6A1_a10b1	complex	simple:P12109	complex:a10b1	complex	COL6A1	True	False	False	curated	True	0.066	0.41	0.173	0.54	1.113	0.151	0.277	0.559	0.323	0.689	1.263	0.3	0.266	0.339	0.621	0.385	0.752	1.325	0.362	0.328	0.401	0.164	0.531	1.105	0.142	0.394	0.157	0.524	1.098	0.135
CPI-SC0458F68A5	COL4A2_a1b1	complex	simple:P08572	complex:a1b1	complex	COL4A2	True	False	False	curated	True	0.066	0.222	0.871	0.189	0.228	0.834	0.805	0.196	0.845	0.202	0.236	0.197	0.194	0.885	0.203	0.241	0.737	0.698	0.683	0.695	1.385	0.704	0.742	0.382	0.343	0.328	0.341	1.031	0.349	0.388
CPI-SS073B0CE7A	ACKR2_CCL3L1	simple:O00590	simple:P16619	ACKR2	CCL3L1	True	True	False	I2D	False	0.066	0.594	0.802	0.972	0.571	0.881	0.65	0.572	0.762	0.449	1.312	0.506	0.663	0.478	0.87	1.041	0.64	0.949	0.719	0.641	0.831	0.517	1.381	0.575	0.634	0.805	0.713	0.483	0.594	1.144
CPI-SS0FF55B42C	EPHB3_EFNB1	simple:P54753	simple:P98172	EPHB3	EFNB1	False	True	False	curated	False	0.066	0.391	0.2	0.373	0.216	0.129	0.313	0.531	0.157	0.142	0.477	0.285	0.142	0.459	0.301	0.151	0.215	0.398	0.617	0.209	0.194	0.529	0.337	0.194	0.511	0.353	0.203	0.267	0.45	0.669
CPI-SS0A9FB762A	LGALS9_PTPRK	simple:O00182	simple:Q15262	LGALS9	PTPRK	True	False	True	InnateDB-All	False	0.066	1.014	0.971	1.348	0.552	0.941	1.635	0.839	1.345	0.549	1.14	1.352	0.556	1.01	1.167	1.148	1.054	1.001	1.06	0.944	1.629	0.833	1.602	0.807	1.469	0.673	1.769	0.973	1.508	0.712
CPI-SS0BE6DBE1A	POMC_MC5R	simple:P01189	simple:P33032	POMC	MC5R	True	False	True	guidetopharmacology.org	False	0.066	0.738	0.396	0.396	0.437	0.691	0.429	1.028	0.687	0.687	0.599	0.643	0.648	0.462	0.63	1.004	0.662	0.662	1.07	0.729	0.729	0.504	0.751	0.41	0.41	0.538	0.452	0.463	0.449	0.422
CPI-SS0BF490275	FGFR1_KL	simple:P11362	simple:Q9UEF7	FGFR1	KL	True	True	False	I2D	False	0.068	0.581	0.615	0.532	0.706	0.292	0.669	0.554	0.647	0.579	0.485	0.963	0.549	0.52	0.998	0.584	0.29	0.768	0.354	0.3	0.778	0.364	1.059	1.537	1.123	0.427	0.905	0.491	0.355	0.833	0.419
CPI-SS0893BD6B6	IL16_GRIN2C	simple:Q14005	simple:Q14957	IL16	GRIN2C	True	False	True	I2D	False	0.068	0.554	1.033	0.855	0.877	1.05	0.872	0.895	0.725	0.547	0.57	0.5	0.642	0.464	0.486	0.625	0.469	0.988	0.809	0.832	0.495	0.476	0.754	0.575	0.598	0.466	0.492	0.605	0.745	0.566	0.589
CPI-SS0ADC886E5	CCL4_CCR8	simple:P13236	simple:P51685	CCL4	CCR8	True	False	True	I2D	False	0.068	1.932	2.785	1.982	1.931	1.439	1.83	2.682	1.879	1.828	2.19	3.042	2.239	2.188	1.686	2.539	1.736	1.685	2.428	3.28	2.477	2.426	2.035	2.887	2.084	2.033	1.718	1.713	2.566	1.763	1.711
CPI-CS0E661878B	LIFR_OSM	complex:LIFR	simple:P13725	OSM	True	True	False	curated	False	0.068	1.861	0.656	0.429	0.947	0.536	0.734	0.936	2.643	0.962	1.028	0.952	1.006	0.962	1.438	1.211	1.729	1.319	1.516	1.963	3.67	1.989	2.055	1.979	2.033	1.989	2.464	2.238	2.756	2.345	2.542
CPI-SS033CB0BB2	CXADR_FAM3C	simple:P78310	simple:Q92520	CXADR	FAM3C	True	True	False	IMEx,IntAct	False	0.068	1.279	0.772	0.831	0.889	0.942	0.615	0.689	0.552	0.839	0.956	0.699	1.808	0.651	0.8	1.301	0.892	1.026	1.36	0.983	1.418	1.471	1.144	0.827	1.218	1.081	1.013	1.368	0.697	0.986	0.824
CPI-SS04B547174	OXT_OXTR	simple:P01178	simple:P30559	OXT	OXTR	True	False	True	I2D	False	0.068	0.205	0.314	0.404	1.042	0.201	0.253	0.362	0.452	1.09	0.249	0.819	0.928	1.019	1.656	0.815	2.017	2.125	2.216	2.854	2.013	0.214	0.323	0.413	1.051	0.21	0.67	0.779	0.869	1.507	0.666
CPI-CS03037FE90	IL3	receptor_IL3	complex:IL3	receptor	simple:P08700	IL3	True	True	False	curated	False	0.068	0.205	0.744	0.326	0.234	0.772	0.355	0.22	0.759	0.341	2.127	2.666	2.248	0.268	0.807	0.389	0.24	0.779	0.361	0.638	1.176	0.759	0.473	1.012	0.594	0.278	0.816	0.399	0.559	1.098	0.68
CPI-SS0D8972B21	WNT1_RYK	simple:P04628	simple:P34925	WNT1	RYK	True	False	True	I2D	False	0.068	1.353	1.265	2.023	1.793	1.216	1.587	0.92	1.229	1.166	1.851	1.429	1.366	1.417	1.241	1.39	1.251	1.494	1.001	1.202	1.072	0.573	1.242	1.013	0.807	1.071	0.649	0.586	0.637	0.61	0.714
CPI-SC052A417CB	COL4A3_a2b1	complex	simple:Q01955	complex:a2b1	complex	COL4A3	True	False	False	curated	True	0.07	0.829	0.742	0.778	1.343	0.876	0.864	0.783	0.191	0.706	0.239	0.227	0.146	0.214	0.729	0.262	0.25	0.169	0.731	0.645	0.681	1.246	0.779	0.767	0.686	0.232	0.146	0.181	0.747	0.28	0.267	0.186
CPI-SC098B43B5A	MADCAM1_a4b7	complex	simple:Q13477	complex:a4b7	complex	MADCAM1	False	False	False	curated	True	0.07	0.888	0.428	0.831	0.694	0.47	0.395	0.439	0.303	0.337	0.357	0.955	0.496	0.899	0.334	0.761	0.537	0.462	0.507	0.371	0.347	0.367	0.966	0.506	0.909	0.302	0.345	0.771	0.547	0.472	0.517	0.381
CPI-SS06ABF2F5A	SELP_CD24	simple:P16109	simple:P25063	SELP	CD24	False	False	False	curated	False	0.07	1.014	0.189	0.318	0.161	0.148	1.007	0.181	0.311	0.154	0.141	1.597	0.691	0.772	0.901	0.723	0.744	0.731	1.229	0.323	0.404	0.534	0.356	0.377	0.363	1.024	0.118	0.199	0.329	0.151	0.171	0.158
CPI-SS098EFF959	CCR7_CCL19	simple:P32248	simple:Q99731	CCR7	CCL19	True	True	False	curated	False	0.07	1.266	1.586	1.304	1.936	1.233	0.658	0.979	0.696	1.329	0.625	0.797	1.118	0.835	1.468	0.764	0.523	0.24	0.873	0.643	0.964	0.681	1.313	0.61	0.466	0.183	0.815	0.356	0.677	0.394	1.026	0.323
CPI-SS0AD0ED887	TNFRSF11B_TNFSF10	simple:O00300	simple:P50591	TNFRSF11B	TNFSF10	True	False	False	curated	False	0.07	0.88	0.866	1.011	0.863	1.242	1.12	0.877	0.852	2.017	1.389	1.077	0.896	1.037	0.943	0.917	1.098	1.039	1.043	1.714	0.91	0.279	0.509	0.387	1.284	0.656	0.344	0.304	0.365	0.306	0.31	0.981
CPI-SS014B0FCD2	WNT1_FZD3	simple:P04628	simple:Q9NPG1	WNT1	FZD3	True	False	True	I2D	False	0.07	1.054	1.022	1.505	1.737	1.065	1.12	2.399	1.775	1.108	1.266	0.921	1.386	1.105	1.047	1.18	1.156	0.906	0.273	0.724	0.957	0.285	0.34	1.619	0.994	0.327	0.486	0.606	0.324	0.267	0.399	0.376
CPI-SS08376F0E6	CSF3_CSF3R	simple:P09919	simple:Q99062	CSF3	CSF3R	True	False	True	curated	False	0.07	1.381	0.714	0.368	1.167	0.459	0.988	1.377	0.711	0.365	1.163	0.455	0.984	1.373	0.707	0.361	1.16	0.451	0.98	1.316	0.65	0.304	1.102	0.394	0.923	0.223	1.383	0.716	0.37	1.169	0.46	0.989
CPI-SS0D95D41D6	FGF7_FGFR4	simple:P21781	simple:P22455	FGF7	FGFR4	True	False	True	I2D	False	0.07	1.376	1.422	0.155	0.152	1.448	0.181	1.376	0.192	1.488	0.221	0.296	1.592	0.325	0.235	1.531	0.265	1.391	0.124	0.147	1.443	0.176	0.127	1.423	0.156	0.132	1.428	0.161	1.393	0.347	1.643	0.376
CPI-SS0AA47D179	TNFRSF13B_CD70	simple:O14836	simple:P32970	TNFRSF13B	CD70	True	True	False	InnateDB-All	False	0.073	1.08	1.842	1.098	2.234	0.987	1.363	1.025	1.238	1.341	0.218	0.981	0.237	1.373	0.501	0.377	0.479	0.24	1.002	0.258	1.394	0.523	0.398	0.501	0.895	1.657	0.914	2.049	0.802	1.178	0.84	1.053	1.156
CPI-SS0E32BEF02	WNT5A_FZD5	simple:P41221	simple:Q13467	WNT5A	FZD5	True	False	True	curated	False	0.073	0.446	0.967	0.781	0.452	0.451	0.449	0.446	0.606	0.453	1.031	0.082	0.602	0.416	0.085	0.082	0.241	0.088	0.666	0.12	0.641	0.454	0.125	0.125	0.123	0.12	0.28	0.127	0.705	0.574	0.388	0.213	0.638
CPI-SS0607D1101	NOTCH1_DLL3	simple:P46531	simple:Q9NYJ7	NOTCH1	DLL3	False	True	False	curated	False	0.073	0.614	0.487	0.476	0.85	0.663	0.61	1.041	0.854	0.801	0.878	0.691	0.638	0.572	0.903	0.716	0.663	0.717	0.53	0.477	0.693	0.505	0.452	1.012	0.825	0.772	0.437	0.611	0.424	0.482	0.538	0.569	0.606
CPI-SC0F7E26271	COL1A1_a11b1	complex	simple:P02452	complex:a11b1	complex	COL1A1	True	False	False	curated	True	0.073	0.519	1.12	0.715	0.286	1.316	0.303	0.713	0.285	1.315	0.302	0.524	1.125	0.527	1.128	0.935	0.506	1.536	0.523	0.679	0.251	1.28	0.268	0.738	0.31	1.339	0.327	0.916	0.487	1.517	0.504	0.517	1.118
CPI-SS08B91FD2A	CCR1_CCL7	simple:P32246	simple:P80098	CCR1	CCL7	True	True	False	curated	False	0.073	0.318	1.012	0.568	0.453	0.471	1.262	0.291	0.985	0.303	0.998	0.312	1.007	0.943	0.828	0.846	1.638	0.871	0.756	0.774	1.565	1.061	0.946	0.964	1.755	1.335	1.221	1.239	2.03	1.18	1.065	1.083	1.874
CPI-SC0592EC3D0	L1CAM_a5b1	complex	simple:P32004	complex:a5b1	complex	L1CAM	False	False	False	curated	True	0.073	0.314	0.693	0.447	0.722	1.009	0.29	0.669	0.423	0.699	0.986	0.319	0.259	0.302	0.284	0.351	0.252	0.416	0.795	0.55	0.825	0.313	1.112	0.297	0.675	0.43	0.705	0.992	0.319	0.698	0.452	0.727	1.014
CPI-SS006C6537E	MDK_LRP1	simple:P21741	simple:Q07954	MDK	LRP1	True	False	True	I2D,InnateDB-All	False	0.073	0.553	0.527	0.588	0.753	0.603	0.615	1.094	1.068	1.129	1.294	1.144	0.545	0.519	0.579	0.744	0.594	0.572	0.545	0.606	0.771	0.621	0.644	0.618	0.679	0.844	0.694	0.595	1.074	1.048	1.109	1.274	1.124
CPI-SC0A3F146C2	COL4A3_a10b1	complex	simple:Q01955	complex:a10b1	complex	COL4A3	True	False	False	curated	True	0.073	0.725	1.008	0.771	1.138	1.711	0.748	0.714	0.37	0.134	0.5	1.074	0.111	0.111	0.393	0.156	0.523	1.097	0.134	0.628	0.91	0.674	1.04	1.614	0.651	0.617	0.129	0.411	0.174	0.541	1.114	0.152	0.118
CPI-SS0F9D53834	JAM3_JAM3	simple:Q9BX67	simple:Q9BX67	JAM3	JAM3	True	False	False	curated	False	0.073	1.042	0.225	0.296	0.336	1.042	1.972	1.155	1.226	1.084	1.266	0.225	1.155	0.339	0.409	0.267	0.449	0.296	1.226	0.409	0.48	0.338	0.52	1.084	0.267	0.338	0.378	0.336	1.266	0.449	0.52	0.378	0.56
CPI-SS0F5B6B186	PDCD1_PDCD1LG2	simple:Q15116	simple:Q9BQ51	PDCD1	PDCD1LG2	True	True	True	curated	False	0.073	0.76	0.518	0.522	0.677	1.088	0.374	0.291	0.702	0.296	0.624	0.415	0.333	0.744	1.302	1.061	1.064	1.219	1.631	0.48	0.242	0.398	0.809	0.724	0.483	0.486	0.641	1.053	0.545	0.303	0.306	0.462	0.873
CPI-SS0BFD8E056	EFNB2_EPHB1	simple:P52799	simple:P54762	EFNB2	EPHB1	False	True	True	curated	False	0.073	0.2	0.948	0.565	0.173	0.21	0.959	0.576	0.184	0.33	1.079	0.696	0.304	1.285	2.034	1.651	1.258	0.197	0.946	0.563	0.171	0.177	0.926	0.543	0.151	0.219	0.968	0.585	0.192	0.175	0.924	0.541	0.148
CPI-SC04B354AE3	COL8A2_a2b1	complex	simple:P25067	complex:a2b1	complex	COL8A2	True	False	False	curated	True	0.075	0.269	0.183	0.218	0.784	0.317	0.304	0.223	0.374	0.288	0.324	0.889	0.422	0.41	0.329	0.29	0.204	0.24	0.805	0.338	0.326	0.245	0.426	0.339	0.375	0.94	0.473	0.461	0.38	0.188	0.703	0.236	0.224	0.143
CPI-SC05CCF815E	COL1A2_a2b1	complex	simple:P08123	complex:a2b1	complex	COL1A2	True	False	False	curated	True	0.075	0.471	0.385	0.421	0.986	0.519	0.507	0.426	0.447	0.361	0.397	0.962	0.495	0.483	0.402	0.274	0.187	0.223	0.788	0.321	0.309	0.228	0.199	0.714	0.247	0.234	0.153	0.339	0.253	0.289	0.854	0.387	0.375	0.294
CPI-SS0B27088B4	CALCR_ADM	simple:P30988	simple:P35318	CALCR	ADM	True	True	False	guidetopharmacology.org	False	0.075	0.383	0.64	0.257	0.315	0.658	0.872	0.7	1.516	0.664	0.214	0.471	0.489	0.703	0.531	1.347	0.495	0.403	0.659	0.277	0.334	0.677	0.891	0.719	1.535	0.684	0.318	0.574	0.25	0.593	0.807	0.635	1.451	0.599
CPI-SC0D870AE49	COL6A3_a2b1	complex	simple:P12111	complex:a2b1	complex	COL6A3	True	False	False	curated	True	0.075	0.218	0.167	0.732	0.265	0.253	0.172	0.392	0.306	0.341	0.907	0.44	0.427	0.346	0.876	0.79	0.826	1.391	0.924	0.912	0.831	0.443	0.357	0.392	0.958	0.491	0.478	0.397	0.218	0.167	0.732	0.265	0.253	0.172
CPI-SS082900482	GPR37L1_PSAP	simple:O60883	simple:P07602	GPR37L1	PSAP	True	True	False	guidetopharmacology.org	False	0.075	1.418	1.182	1.104	1.76	1.914	1.58	1.838	1.714	1.107	1.04	1.59	1.187	1.093	1.354	1.276	1.106	1.112	1.025	1.168	1.027	1.932	2.086	1.752	2.009	1.886	1.367	1.131	1.053	1.709	1.863	1.529	1.786	1.663
CPI-SS0CB4F2FE4	PDGFB_ADGRV1	simple:P01127	simple:Q8WXG9	PDGFB	ADGRV1	True	False	True	InnateDB-All	False	0.075	0.089	0.2	0.092	0.109	0.311	0.422	0.314	0.331	0.303	0.766	0.877	0.769	0.786	0.758	0.192	0.304	0.195	0.212	0.184	0.422	0.533	0.425	0.442	0.414	0.089	0.2	0.092	0.108	0.166	0.277	0.169	0.186	0.158
CPI-SS043E0F61D	PTGER3_GHRL	simple:P43115	simple:Q9UBU3	PTGER3	GHRL	True	True	False	InnateDB-All	False	0.075	0.325	0.327	0.381	0.765	1.137	0.519	0.315	0.325	0.4	0.329	0.317	0.798	0.8	0.855	1.238	1.61	0.992	0.788	0.799	0.873	0.802	0.791	0.302	0.305	0.359	0.743	1.115	0.497	0.293	0.303	0.378	0.307	0.295
CPI-SS087E0E3FB	EFNB2_EPHA4	simple:P52799	simple:P54764	EFNB2	EPHA4	False	True	True	curated	False	0.075	0.188	0.206	0.488	0.198	0.216	0.499	0.318	0.276	0.269	0.273	0.336	0.266	0.619	1.273	1.23	1.223	1.227	1.291	1.22	1.573	0.185	0.204	0.486	0.165	0.183	0.466	0.207	0.164	0.225	0.507	0.163	0.181	0.464
CPI-SS05BE83BC6	CSF1R_CSF3	simple:P07333	simple:P09919	CSF1R	CSF3	True	True	False	guidetopharmacology.org	False	0.075	0.178	0.175	0.171	0.18	0.195	0.191	0.188	0.197	0.701	0.698	0.694	0.637	0.703	0.872	0.868	0.865	0.807	0.874	0.287	0.283	0.28	0.222	0.289	1.108	1.104	1.101	1.043	1.11	0.41	0.407	0.403	0.346	0.412
CPI-SC062C5C6C2	PLA2G2A_a5b1	complex	simple:P14555	complex:a5b1	complex	PLA2G2A	True	False	False	curated	True	0.075	1.658	1.598	1.641	1.623	1.578	1.69	1.591	1.755	1.57	2.134	1.888	2.164	1.652	2.451	0.403	0.343	0.386	0.368	0.323	0.435	0.336	0.501	0.316	0.879	0.634	0.909	0.397	1.196	0.29	0.669	0.423	0.698	0.985
CPI-SS0BF9FA3F2	ERBB3_NRG1	simple:P21860	simple:Q02297	ERBB3	NRG1	True	True	True	curated	False	0.075	0.393	0.758	0.686	0.378	0.742	0.67	0.437	0.802	0.73	0.37	0.734	0.662	0.338	0.703	0.631	0.344	0.709	0.636	0.353	0.717	0.645	0.367	0.732	0.66	0.33	0.694	0.622	0.389	0.754	0.682	0.363	0.728	0.656
CPI-SC0C907A888	COL8A2_a10b1	complex	simple:P25067	complex:a10b1	complex	COL8A2	True	False	False	curated	True	0.075	0.166	0.448	0.211	0.578	1.152	0.189	0.155	0.271	0.553	0.317	0.683	1.257	0.294	0.26	0.187	0.469	0.233	0.599	1.173	0.21	0.176	0.322	0.605	0.368	0.735	1.308	0.345	0.311	0.367	0.131	0.497	1.071	0.108
CPI-SS09375CA29	ADGRL1_NRG1	simple:O94910	simple:Q02297	ADGRL1	NRG1	True	True	True	InnateDB-All	False	0.075	0.318	0.683	0.611	1.184	1.549	1.477	0.461	0.825	0.753	0.314	0.679	0.607	0.385	0.75	0.678	0.356	0.721	0.649	0.336	0.701	0.629	0.313	0.678	0.606	0.374	0.738	0.666	0.869	1.233	1.161	0.437	0.801	0.729
CPI-SS02246DA17	CXCR3_CXCL9	simple:P49682	simple:Q07325	CXCR3	CXCL9	True	True	False	curated	False	0.075	1.156	0.48	1.841	1.001	0.325	1.686	1.148	0.471	1.833	1.353	0.676	2.038	2.725	2.048	3.409	1.022	0.346	1.707	1.231	0.554	1.915	1.029	0.352	1.713	1.586	0.909	2.27	1.238	0.561	1.923	1.07	0.394	1.755
CPI-SC0D9B795CC	CDH1_a2b1	complex	simple:P12830	complex:a2b1	complex	CDH1	False	False	False	curated	True	0.077	0.227	0.141	0.177	0.742	0.275	0.263	0.182	0.514	0.428	0.464	1.029	0.562	0.55	0.469	1.126	1.039	1.075	1.64	1.173	1.161	1.08	0.683	0.596	0.632	1.197	0.73	0.718	0.637	0.223	0.137	0.738	0.271	0.258	0.177
CPI-SS0938C6980	DLL4_NOTCH3	simple:Q9NR61	simple:Q9UM47	DLL4	NOTCH3	False	False	True	curated	False	0.077	0.116	0.295	0.418	0.116	0.72	0.313	0.248	0.427	0.55	0.249	0.853	0.446	0.262	0.385	0.688	0.281	0.876	1.056	1.178	0.877	1.481	1.074	0.955	1.134	1.257	0.955	1.56	1.153	0.715	0.895	1.017	0.716	1.32	0.913
CPI-SS08D0F9109	EFNB2_EPHB4	simple:P52799	simple:P54760	EFNB2	EPHB4	False	True	True	curated	False	0.077	1.121	0.456	0.136	0.13	0.138	1.132	0.466	0.147	0.14	0.148	1.252	0.586	0.267	0.26	0.268	2.207	1.541	1.222	1.215	1.223	1.119	0.453	0.136	1.099	0.433	0.115	1.141	0.475	0.156	0.149	0.157	1.097	0.431	0.113
CPI-SC0527EEE7A	C3_aMb2	complex	simple:P01024	complex:aMb2	complex	C3	True	False	False	curated	True	0.077	0.412	0.312	0.7	0.564	0.51	1.077	0.54	0.739	0.741	0.781	0.992	0.892	0.835	0.751	0.805	1.281	1.144	1.09	1.657	1.12	1.319	0.584	0.623	0.835	0.735	0.678	0.594	0.648	1.124	0.987	0.933	1.5	0.963	1.162
CPI-CS0007697A7	NKG2D	II	receptor_ULBP1	complex:NKG2D	II	receptor	simple:Q9BZM6	ULBP1	False	True	True	curated	False	0.077	0.35	0.413	0.34	0.417	0.973	0.583	0.316	0.38	0.306	0.383	0.939	0.549	0.847	0.457	0.493	0.557	0.484	0.561	1.116	0.727	0.344	0.408	0.335	0.412	0.967	0.578	0.563	0.627	0.553	0.631	1.186	0.797	0.799	0.409
CPI-SS087B53ABF	JAM2_JAM3	simple:P57087	simple:Q9BX67	JAM2	JAM3	True	False	False	curated	False	0.077	0.267	1.198	0.381	0.452	0.31	0.492	0.222	1.153	0.336	0.407	0.265	0.447	0.149	1.079	0.262	0.333	0.191	0.373	0.959	1.89	1.073	1.144	1.002	1.184	1.021	0.204	0.275	0.315	0.203	1.133	0.317	0.388	0.245	0.428
CPI-SS07A9A501C	FGFR3_FGF9	simple:P22607	simple:P31371	FGFR3	FGF9	True	True	False	I2D,InnateDB-All	False	0.077	0.26	0.288	0.503	0.549	0.275	0.314	1.001	0.878	1.029	0.889	1.244	1.29	1.016	1.055	0.31	0.339	0.553	0.599	0.325	0.364	0.828	0.706	0.857	0.717	1.072	1.117	0.843	0.882	0.264	0.293	0.508	0.553	0.279	0.318
CPI-CS073233FCC	ACVR_1A2A	receptor_INHBB	complex:ACVR_1A2A	receptor	simple:P09529	INHBB	True	True	False	curated	False	0.077	0.19	0.343	0.132	0.144	0.297	0.159	0.312	0.27	0.423	0.212	0.16	0.313	0.19	0.343	0.132	0.376	0.529	0.318	0.182	0.335	0.124	0.207	0.36	0.149	0.191	0.344	0.133	0.161	0.314	0.254	0.407	0.196	0.167	0.32
CPI-SS0EFE0B07A	CXCL12_CXCR3	simple:P48061	simple:P49682	CXCL12	CXCR3	True	False	True	guidetopharmacology.org	False	0.077	0.456	1.827	0.333	0.688	0.341	0.338	0.33	0.535	1.906	0.412	0.767	0.42	0.751	0.596	0.743	0.948	2.319	0.617	0.825	0.623	1.18	0.833	0.665	1.261	1.107	1.253	1.458	2.83	1.128	1.336	1.134	1.691	1.343	1.175
CPI-SC011F01833	COL1A2_a10b1	complex	simple:P08123	complex:a10b1	complex	COL1A2	True	False	False	curated	True	0.077	0.368	0.65	0.414	0.78	1.354	0.391	0.357	0.344	0.626	0.39	0.756	1.33	0.367	0.333	0.17	0.453	0.216	0.583	1.156	0.193	0.159	0.096	0.378	0.141	0.508	1.081	0.119	0.236	0.518	0.282	0.648	1.222	0.259	0.225
CPI-CS02899BF8B	ACVR_1B2A	receptor_INHBB	complex:ACVR_1B2A	receptor	simple:P09529	INHBB	True	True	False	curated	False	0.077	0.19	0.343	0.132	0.144	0.297	0.159	0.312	0.27	0.423	0.212	0.16	0.313	0.19	0.343	0.132	0.376	0.529	0.318	0.182	0.335	0.124	0.207	0.36	0.149	0.191	0.344	0.133	0.161	0.314	0.254	0.407	0.196	0.167	0.32
CPI-SS0C0A61F92	PLXNB2_SEMA4G	simple:O15031	simple:Q9NTN9	PLXNB2	SEMA4G	False	True	False	curated	False	0.077	0.535	0.872	0.497	0.834	0.762	0.341	1.099	0.33	0.833	0.412	1.17	0.401	0.497	0.835	1	0.579	1.338	0.568	0.842	0.421	1.18	0.41	0.878	0.457	1.216	0.446	0.855	0.434	1.193	0.423	0.922	0.501	1.259	0.49
CPI-CS007ADC2D1	ACVR_1C2A	receptor_INHBB	complex:ACVR_1C2A	receptor	simple:P09529	INHBB	True	True	False	curated	False	0.077	0.19	0.343	0.132	0.144	0.297	0.159	0.312	0.27	0.423	0.212	0.16	0.313	0.19	0.343	0.132	0.376	0.529	0.318	0.182	0.335	0.124	0.207	0.36	0.149	0.191	0.344	0.133	0.161	0.314	0.254	0.407	0.196	0.167	0.32
CPI-SC07375C073	COL6A3_a10b1	complex	simple:P12111	complex:a10b1	complex	COL6A3	True	False	False	curated	True	0.077	0.114	0.397	0.16	0.527	1.1	0.137	0.289	0.571	0.334	0.701	1.275	0.312	0.278	0.773	1.055	0.819	1.185	1.759	0.796	0.762	0.34	0.622	0.385	0.752	1.326	0.363	0.329	0.115	0.397	0.16	0.527	1.1	0.137	0.104
CPI-SC041DEF0FB	COL5A1_a10b1	complex	simple:P20908	complex:a10b1	complex	COL5A1	True	False	False	curated	True	0.077	0.394	0.524	1.097	0.401	0.531	1.105	0.448	0.211	0.578	1.152	0.632	0.914	0.678	1.044	1.618	0.655	0.621	0.385	0.515	1.089	0.293	0.575	0.338	0.705	1.279	0.316	0.282	0.712	0.994	0.757	1.124	1.698	0.735	0.701
CPI-SS03DA2A820	FGF2_CD44	simple:P09038	simple:P16070	FGF2	CD44	True	False	True	I2D,InnateDB-All	False	0.077	1.632	1.489	1.467	1.286	1.243	1.39	1.867	1.1	1.145	1.939	2.033	1.297	1.717	1.838	1.16	1.691	1.858	1.764	1.853	1.792	2.074	1.23	1.087	1.465	1.537	1.631	1.315	1.436	1.289	1.456	1.362	1.451	1.39	1.672
CPI-SS0C412B7DE	CD70_TNFRSF17	simple:P32970	simple:Q02223	CD70	TNFRSF17	True	False	True	InnateDB-All	False	0.077	0.515	0.733	1.185	0.241	1.278	1.495	1.947	1.004	0.534	0.752	1.204	0.26	1.67	1.887	2.34	1.396	0.422	0.64	1.092	0.798	1.016	1.468	0.524	0.46	0.678	1.13	0.674	0.891	1.343	0.4	0.776	0.994	1.446	0.502
CPI-SS0A81A3626	WNT7A_LDLR	simple:O00755	simple:P01130	WNT7A	LDLR	True	False	True	InnateDB-All	False	0.077	0.59	0.528	0.748	0.708	0.54	0.886	0.476	0.617	0.602	0.58	0.506	0.458	0.669	0.434	1.134	0.411	0.753	0.701	0.638	0.858	0.818	0.65	0.997	0.586	0.727	0.713	0.69	0.617	0.569	0.78	0.544	1.244	0.522	0.864
CPI-SC0B9199C7F	LAMC1_aVb3	complex	simple:P11047	complex:aVb3	complex	LAMC1	True	False	False	curated	True	0.079	0.834	0.773	1.071	0.742	0.396	0.335	0.633	0.304	1.096	1.035	1.333	1.004	0.165	0.104	0.402	0.192	0.131	0.429	0.1	0.186	0.126	0.424	0.095	0.23	0.169	0.467	0.138	0.207	0.146	0.444	0.115	0.188	0.128	0.426	0.097
CPI-SS0ED2573CA	TNFSF11_TNFRSF11A	simple:O14788	simple:Q9Y6Q6	TNFSF11	TNFRSF11A	True	True	True	curated	False	0.079	0.106	0.107	0.161	0.249	0.664	0.615	0.181	0.21	0.21	0.264	0.353	0.768	0.719	0.285	0.188	0.188	0.242	0.331	0.746	0.697	0.263	1.132	1.133	1.187	1.275	1.69	1.641	1.207	0.09	0.091	0.145	0.233	0.649	0.599	0.165
CPI-CS0D48BE017	IL2	receptor_HA_IL2	complex:IL2	receptor_HA	simple:P60568	IL2	True	True	False	curated	False	0.079	0.879	0.297	0.602	0.409	0.871	0.288	0.594	0.401	2.231	1.649	1.954	1.761	1.854	1.271	1.577	1.384	1.815	1.233	1.539	1.346	0.812	0.535	0.342	1.175	0.593	0.898	0.705	0.844	0.262	0.567	0.375	1.424	0.842	1.147	0.955
CPI-SS09C917D22	TNF_FLT4	simple:P01375	simple:P35916	TNF	FLT4	True	False	True	InnateDB-All	False	0.079	0.439	0.366	0.81	0.536	0.464	0.907	0.667	0.722	0.473	0.4	0.843	0.67	0.686	0.747	0.674	1.117	0.726	0.786	0.714	1.157	0.501	0.428	0.871	0.689	0.637	0.564	1.008	0.718	0.406	0.776	0.678	0.424	0.351	0.794	0.693
CPI-SS0331C5A49	GDF11_ANTXR1	simple:O95390	simple:Q9H6X2	GDF11	ANTXR1	True	False	True	InnateDB-All	False	0.079	0.613	1.12	0.565	0.826	0.514	1.021	0.466	0.658	0.544	1.052	0.496	0.97	0.826	0.783	1.283	1.79	1.235	0.556	1.063	0.508	0.891	0.876	1.383	0.828	0.721	1.228	0.673	0.484	0.991	0.436	0.717	1.224	0.669	0.626	0.769
CPI-SS01469637C	WNT2B_FZD4	simple:Q93097	simple:Q9ULV1	WNT2B	FZD4	True	False	True	curated	False	0.079	0.176	0.392	1.479	0.197	0.198	0.643	0.859	1.945	0.664	0.665	0.315	0.531	1.617	0.336	0.337	0.572	0.788	1.874	0.592	0.594	0.11	0.326	1.412	0.131	0.132	0.257	0.473	1.56	0.278	0.279	0.234	0.449	1.536	0.254	0.255
CPI-SS044CF7EAE	TNFRSF10A_FGFR4	simple:O00220	simple:P22455	TNFRSF10A	FGFR4	True	True	True	InnateDB-All	False	0.079	1.428	0.289	1.585	0.318	1.01	2.306	1.039	1.382	1.496	1.461	0.513	1.809	0.542	1.376	1.419	1.378	0.392	1.688	0.421	1.415	0.598	1.894	0.628	1.413	0.25	1.546	0.28	1.482	0.475	1.771	0.504	1.479	0.307	1.603	0.336
CPI-SS0A915097A	GRIN2D_IL16	simple:O15399	simple:Q14005	GRIN2D	IL16	True	True	False	I2D	False	0.079	0.425	0.904	0.921	0.596	0.513	0.495	0.859	0.625	0.476	0.616	0.855	0.872	0.547	0.463	0.809	0.575	0.566	0.717	0.507	1.196	1.213	0.888	0.663	0.805	0.788	1.151	0.658	0.639	0.917	0.629	0.655	0.768	0.471	0.908	0.508
CPI-SS0FDAB7BA8	CXCL10_DPP4	simple:P02778	simple:P27487	CXCL10	DPP4	True	False	True	curated	False	0.079	0.473	0.753	0.675	0.907	0.346	0.4	0.732	0.382	0.394	1.013	0.443	0.934	1.166	0.507	0.562	0.894	0.544	0.555	1.174	0.605	1.095	1.328	0.323	0.378	0.71	0.359	0.371	0.99	0.42	0.911	1.143	0.507	0.787	0.709	0.941
CPI-SC067AD890A	VTN_aVb1	complex	simple:P04004	complex:aVb1	complex	VTN	True	False	False	curated	True	0.082	0.226	0.285	0.678	0.264	0.491	0.832	0.254	0.916	0.478	0.201	0.261	0.653	0.239	0.466	0.808	0.229	0.891	0.453	0.545	0.643	0.606	0.605	0.702	0.565	1.095	0.681	0.551	0.557	0.561	0.576	0.574	0.908	1.249	0.671	1.333	0.895
CPI-SS0DC2A6D35	IL6_HRH1	simple:P05231	simple:P35367	IL6	HRH1	True	False	True	IMEx,InnateDB-All,IntAct	False	0.082	0.849	0.881	0.859	0.894	1.153	1.518	0.193	0.225	0.203	0.238	0.497	0.862	0.18	0.213	0.191	0.225	0.485	0.85	0.205	0.237	0.215	0.25	0.509	0.874	0.509	0.541	0.519	0.554	0.813	1.178	0.2	0.232	0.21	0.245	0.504	0.869
CPI-CS0F6CFB979	BMPR1A_BMPR2_BMP6	complex:BMPR1A_BMPR2	simple:P22004	BMP6	True	True	False	curated	False	0.082	0.254	0.609	0.262	0.288	0.409	0.764	0.417	0.443	0.236	0.591	0.244	0.27	0.174	0.529	0.182	0.209	0.331	0.686	0.339	0.365	0.193	0.548	0.201	0.227	0.325	0.679	0.332	0.359	0.403	0.758	0.411	0.437	0.661	1.016	0.669	0.695
CPI-SS0B186A32C	CCR5_CCL7	simple:P51681	simple:P80098	CCR5	CCL7	True	True	False	curated	False	0.082	0.451	0.336	0.354	1.146	0.333	0.219	0.237	1.028	0.316	0.22	1.011	0.282	0.976	0.341	0.227	0.245	1.036	0.29	0.194	0.985	0.392	0.277	0.295	1.087	0.73	0.616	0.634	1.425	1.02	0.906	0.924	1.715	0.671	0.557	0.575	1.366
CPI-SS055B305F1	CEACAM1_CD209	simple:P13688	simple:Q9NNX6	CEACAM1	CD209	True	False	True	curated	False	0.082	0.519	0.767	0.75	0.834	1.152	1.4	0.539	0.787	0.961	1.046	1.364	1.612	0.483	0.731	0.497	0.745	0.839	0.924	1.242	1.489	0.486	0.734	0.218	0.536	0.784	0.68	0.765	1.082	1.33	0.364	0.449	0.767	1.015	0.25	0.568	0.816
CPI-SS0C17BB772	FCGR2A_CXCL9	simple:P12318	simple:Q07325	FCGR2A	CXCL9	True	True	False	IMEx,IntAct	False	0.082	1.052	0.375	1.737	1.013	0.337	1.698	1.463	0.787	2.148	0.994	0.317	1.678	1.205	0.528	1.89	0.976	0.299	1.66	0.99	0.313	1.675	1.799	1.122	2.484	1.773	1.096	2.458	1.608	0.931	2.293	1.521	0.844	2.206	1.628	0.951	2.312
CPI-SS06D13FCD3	DSC2_DSG2	simple:Q02487	simple:Q14126	DSC2	DSG2	False	False	False	curated	False	0.082	0.563	1.143	0.213	0.227	0.708	1.288	0.358	0.236	0.604	1.184	0.253	0.392	0.874	1.453	0.523	0.402	0.429	0.911	1.49	0.56	0.439	0.531	1.013	1.592	0.662	0.541	0.874	1.355	1.935	1.005	0.883	0.374	0.856	1.435	0.505	0.384
CPI-SS092E57263	CSF2_CSF1R	simple:P04141	simple:P07333	CSF2	CSF1R	True	False	True	guidetopharmacology.org	False	0.082	0.345	0.362	0.868	1.039	0.454	1.275	0.577	0.739	0.909	1.146	0.448	1.625	1.642	1.598	2.149	2.319	1.734	2.555	1.858	0.824	0.841	0.797	1.347	1.518	0.933	1.754	1.056	0.673	0.843	1.079	0.382	0.696	0.867	0.282	1.103	0.406
CPI-SS0708FE6FF	NRG1_LSR	simple:Q02297	simple:Q86X29	NRG1	LSR	True	True	True	InnateDB-All	False	0.082	0.438	0.339	0.455	0.385	0.342	0.549	0.77	0.359	0.867	0.858	0.492	0.447	0.803	0.704	0.82	0.75	0.707	0.914	1.135	0.723	1.231	1.223	0.857	0.811	0.731	0.632	0.747	0.678	0.635	0.842	1.063	0.651	1.159	1.151	0.785	0.739
CPI-SC0B292AEE6	GP1BA_aMb2	complex	simple:P07359	complex:aMb2	complex	GP1BA	False	False	False	curated	True	0.082	0.516	0.555	0.767	0.667	0.61	0.526	0.58	1.055	0.918	0.865	1.432	0.895	1.094	0.367	0.656	0.519	0.465	1.032	0.495	0.694	0.463	0.364	0.277	0.752	0.615	0.562	1.129	0.592	0.79	0.367	0.656	0.519	0.465	1.033	0.495	0.694
CPI-SS0E075E5AF	NRG1_NETO2	simple:Q02297	simple:Q8NC67	NRG1	NETO2	True	True	True	InnateDB-All	False	0.082	0.306	0.3	0.932	0.479	0.363	0.295	0.311	0.756	0.659	0.512	0.344	0.603	0.671	0.665	1.296	0.844	0.728	0.659	0.675	1.12	1.024	0.877	0.709	0.967	0.599	0.593	1.224	0.771	0.656	0.587	0.603	1.048	0.952	0.804	0.637	0.895
CPI-SS0E61DB5DF	FLT1_PGF	simple:P17948	simple:P49763	FLT1	PGF	True	True	False	curated	False	0.084	0.128	0.174	0.145	0.251	0.215	0.297	0.222	0.268	0.216	0.422	0.386	0.468	0.393	0.439	0.387	0.283	0.247	0.329	0.255	0.301	0.248	0.242	0.205	0.288	0.213	0.259	0.207	0.143	0.189	0.114	0.16	0.608	0.572	0.654	0.579	0.625	0.573
CPI-SS0CCCF7C69	PLXNB1_SEMA4D	simple:O43157	simple:Q92854	PLXNB1	SEMA4D	True	True	True	curated	False	0.084	1.422	1.154	1.019	1.083	0.744	1.388	1.348	1.025	0.985	0.931	1.057	1.404	1.52	1.495	1.333	1.355	1.053	0.774	1.148	0.897	1.027	0.776	0.742	0.702	0.758	0.874	0.849	0.687	0.709	0.847	0.813	0.774	0.83	0.945	0.92	0.758	0.78
CPI-SS040630206	CXCL2_CXCR1	simple:P19875	simple:P25024	CXCL2	CXCR1	True	False	True	I2D	False	0.084	1.803	0.761	1.918	0.876	0.353	1.917	0.875	0.352	1.822	0.78	1.863	0.82	2.497	0.889	1.455	0.932	0.835	2.523	0.915	1.481	0.958	0.861	2.457	0.849	1.415	0.892	0.795	2.141	0.533	1.098	0.575	0.478	2.965	1.358	1.923	1.4	1.303
CPI-CS0CFA0E4C5	BMPR1A_BMPR2_GDF7	complex:BMPR1A_BMPR2	simple:Q7Z4P5	GDF7	True	True	False	curated	False	0.084	0.892	0.734	0.544	1.047	0.889	0.342	0.699	0.336	0.874	0.716	0.526	0.813	0.655	0.464	0.969	0.812	0.264	0.621	0.258	0.831	0.674	0.483	0.963	0.805	0.257	0.614	0.251	1.041	0.883	0.336	0.693	0.33	1.299	1.142	0.594	0.951	0.588
CPI-SS0F562FEA5	CXCL2_CXCR2	simple:P19875	simple:P25025	CXCL2	CXCR2	True	False	True	curated	False	0.084	1.965	0.66	2.08	0.775	0.355	2.078	0.773	0.354	1.983	0.678	2.024	0.719	2.659	0.831	1.354	0.934	0.852	2.685	0.857	1.379	0.96	0.878	2.619	0.791	1.313	0.894	0.812	2.302	0.475	0.997	0.577	0.495	3.127	1.299	1.822	1.402	1.32
CPI-CS0FBBCDD66	IL4	receptor_IL4	complex:IL4	receptor	simple:P05112	IL4	True	True	False	curated	False	0.084	0.836	0.67	0.694	0.782	0.616	0.64	0.633	0.749	0.583	0.607	0.559	0.961	0.796	0.82	1.1	0.934	0.958	0.586	0.65	0.508	0.805	0.639	0.663	0.539	0.589	0.681	0.539	0.622	1.166	1	1.024	0.732	0.566	0.59	0.785	0.619	0.643
CPI-SS082AD7B6A	FZD6_WNT5A	simple:O60353	simple:P41221	FZD6	WNT5A	True	True	False	curated	False	0.084	0.687	0.322	0.361	0.294	0.688	0.324	0.362	0.296	1.003	0.639	0.677	0.611	0.612	0.247	0.286	0.219	0.995	0.63	0.669	0.602	1.257	0.892	0.93	0.864	1.315	0.951	0.989	0.923	0.723	0.359	0.397	0.331	0.46	0.134	0.489	0.124	0.163
CPI-SS01963C4CA	TG_ASGR1	simple:P01266	simple:P07306	TG	ASGR1	True	False	True	I2D	False	0.084	0.575	0.284	0.81	0.183	0.642	0.673	1.11	0.819	1.345	0.719	1.178	0.362	0.8	0.509	1.035	0.408	0.867	0.525	0.234	0.76	0.592	0.551	0.26	0.786	0.619	0.222	0.66	0.369	0.895	0.268	0.727	0.499	0.937	0.646	1.172	0.545	1.004
CPI-SS09D379E5B	NOTCH4_DLL3	simple:Q99466	simple:Q9NYJ7	NOTCH4	DLL3	False	True	False	curated	False	0.084	0.38	0.193	0.14	0.808	0.621	0.568	0.739	0.552	0.499	0.423	0.236	0.183	1.879	1.692	1.639	0.743	0.555	0.502	0.545	0.358	0.305	0.564	0.377	0.324	0.347	0.159	0.617	0.43	0.377	0.363	0.176	0.643	0.456	0.403	0.399	0.211	0.158
CPI-SC035134F18	COL5A1_a2b1	complex	simple:P20908	complex:a2b1	complex	COL5A1	True	False	False	curated	True	0.084	0.215	0.729	0.262	0.25	0.737	0.27	0.258	0.269	0.784	0.317	0.304	0.223	0.735	0.649	0.685	1.25	0.783	0.771	0.69	0.206	0.721	0.254	0.241	0.396	0.31	0.345	0.911	0.444	0.431	0.35	0.815	0.729	0.764	1.33	0.863	0.85	0.769
CPI-SS08BFF4F9B	CCL3_CCR3	simple:P10147	simple:P51677	CCL3	CCR3	True	False	True	curated	False	0.084	1.256	0.787	1.01	0.85	0.886	1.222	1.865	1.396	1.196	0.871	0.9	0.888	0.885	1.638	2.282	1.812	1.612	1.112	0.643	0.863	1.367	2.011	1.541	1.341	1.082	1.206	0.736	0.959	1.603	1.133	0.933	1.021	1.982	2.626	2.156	1.956	1.106
CPI-SS0D3C90DDA	WISP3_SORL1	simple:O95389	simple:Q92673	WISP3	SORL1	True	False	True	InnateDB-All	False	0.086	0.818	0.875	0.668	1.405	0.949	0.808	0.877	0.604	0.912	0.982	0.675	1.177	1.716	1.15	0.759	0.751	0.866	0.707	0.904	0.676	1.215	0.649	0.903	0.48	0.675	1.214	0.648	0.968	0.512	0.545	0.74	1.279	0.713	0.882	0.459	0.654	1.193	0.627
CPI-CS0B79F5D68	ACVR_1C2B	receptor_INHBA	complex:ACVR_1C2B	receptor	simple:P08476	INHBA	True	True	False	curated	False	0.086	0.603	1.195	0.417	0.428	0.305	0.897	0.702	1.294	0.516	0.527	0.906	1.498	0.72	0.731	0.409	1.001	0.223	0.234	0.437	1.029	0.251	0.262	0.316	0.908	0.13	0.141	0.389	0.981	0.203	0.214	0.378	0.97	0.192	0.203	0.305	0.897	0.119
CPI-SS059CC19A3	CCR1_CCL14	simple:P32246	simple:Q16627	CCR1	CCL14	True	True	False	curated	False	0.086	0.726	1.714	0.376	0.411	0.977	1.965	0.461	0.7	1.688	0.712	1.7	0.721	1.709	0.751	0.787	1.352	2.34	0.836	0.678	0.714	1.279	2.267	0.764	0.869	0.904	1.47	2.458	0.954	1.143	1.179	1.744	2.732	1.228	0.988	1.023	1.589	2.576	1.073
CPI-CS0C159B54D	ACVR_1B2B	receptor_INHBA	complex:ACVR_1B2B	receptor	simple:P08476	INHBA	True	True	False	curated	False	0.086	0.603	1.195	0.417	0.428	0.305	0.897	0.702	1.294	0.516	0.527	0.906	1.498	0.72	0.731	0.409	1.001	0.223	0.234	0.437	1.029	0.251	0.262	0.316	0.908	0.13	0.141	0.389	0.981	0.203	0.214	0.378	0.97	0.192	0.203	0.305	0.897	0.119
CPI-SC091173D82	COL4A4_a1b1	complex	simple:P53420	complex:a1b1	complex	COL4A4	True	False	False	curated	True	0.086	0.845	0.806	0.791	0.803	1.493	0.812	0.85	0.88	0.841	0.826	0.838	1.529	0.847	0.885	0.297	0.258	0.244	0.256	0.946	0.264	0.303	0.821	0.736	0.697	0.682	0.694	1.384	0.703	0.741	0.49	0.451	0.436	0.448	1.139	0.457	0.496	0.817
CPI-SS05B4EB419	EFNA3_EPHA4	simple:P52797	simple:P54764	EFNA3	EPHA4	False	False	True	curated	False	0.086	0.154	0.173	0.455	0.518	0.475	0.468	0.472	0.536	0.466	0.818	0.208	0.166	0.159	0.163	0.226	0.509	0.224	0.181	0.175	0.179	0.242	0.525	0.153	0.171	0.454	0.245	0.203	0.196	0.2	0.264	0.193	0.546	0.144	0.162	0.445	0.164	0.182	0.464
CPI-CS0A34112A6	IL2	receptor_I_IL2	complex:IL2	receptor_I	simple:P60568	IL2	True	True	False	curated	False	0.086	1.373	0.791	1.096	0.904	1.039	0.762	0.806	1.897	1.315	1.62	1.428	1.477	0.895	1.2	1.008	1.474	0.892	1.197	1.005	2.076	1.493	1.799	1.606	1.589	1.007	1.312	1.119	1.309	0.727	1.032	0.84	1.682	1.1	1.405	1.213	1.179	0.902
CPI-CS04DD927C9	ACVR_1A2B	receptor_INHBA	complex:ACVR_1A2B	receptor	simple:P08476	INHBA	True	True	False	curated	False	0.086	0.603	1.195	0.417	0.428	0.305	0.897	0.702	1.294	0.516	0.527	0.906	1.498	0.72	0.731	0.409	1.001	0.223	0.234	0.437	1.029	0.251	0.262	0.316	0.908	0.13	0.141	0.389	0.981	0.203	0.214	0.378	0.97	0.192	0.203	0.305	0.897	0.119
CPI-SS03C51D352	TNFRSF13B_TNFSF13B	simple:O14836	simple:Q9Y275	TNFRSF13B	TNFSF13B	True	True	False	curated	False	0.086	1.615	1.129	0.923	0.993	1.101	0.917	1.132	0.973	1.774	1.451	1.968	1.629	1.68	0.753	0.913	0.589	1.107	0.768	0.819	0.775	0.934	0.611	1.128	0.789	0.84	1.43	0.944	0.738	0.808	0.917	0.732	0.948	0.788	1.589	1.266	1.784	1.444	1.495
CPI-SC0D19BAF15	FN1_a10b1	complex	simple:P02751	complex:a10b1	complex	FN1	True	False	False	curated	True	0.088	0.413	0.176	0.543	1.116	0.153	0.134	0.416	0.18	0.546	1.12	0.157	0.373	0.655	0.419	0.785	1.359	0.396	0.362	1.311	1.593	1.356	1.723	2.297	1.334	1.3	0.14	0.422	0.186	0.552	1.126	0.163	0.129	0.161	0.443	0.206	0.573	1.146
CPI-SC01FFC9392	FN1_a2b1	complex	simple:P02751	complex:a2b1	complex	FN1	True	False	False	curated	True	0.088	0.234	0.748	0.281	0.269	0.188	0.237	0.187	0.752	0.285	0.273	0.192	0.476	0.39	0.426	0.991	0.524	0.512	0.431	1.414	1.328	1.363	1.929	1.462	1.449	1.368	0.243	0.157	0.193	0.758	0.291	0.279	0.198	0.264	0.177	0.213	0.778	0.311
CPI-CS0AA769F5B	PlexinA3_complex1_SEMA3A	complex:PlexinA3_complex1	simple:Q14563	SEMA3A	True	True	False	curated	False	0.088	0.101	0.546	0.323	0.116	0.195	0.486	0.931	0.709	0.501	0.58	0.233	0.677	0.455	0.247	0.327	0.139	0.583	0.361	0.153	0.232	0.22	0.664	0.442	0.235	0.314	0.559	1.003	0.781	0.573	0.653	0.893	1.338	1.116	0.908	0.987	0.55	0.328	0.12	0.199
CPI-SS02928C71A	PDGFB_LRP1	simple:P01127	simple:Q07954	PDGFB	LRP1	True	False	True	I2D,InnateDB-All	False	0.088	0.564	0.538	0.598	0.764	0.613	0.306	0.786	0.76	0.82	0.985	0.835	0.761	1.241	1.215	1.275	1.44	1.29	0.188	0.667	0.641	0.701	0.867	0.717	0.418	0.897	0.871	0.931	1.097	0.946	0.563	0.537	0.598	0.763	0.613	0.64	0.614	0.675	0.84
CPI-SS0CC5DCE80	CDH1_KLRG1	simple:P12830	simple:Q96E93	CDH1	KLRG1	False	False	True	curated	False	0.088	0.749	0.305	0.916	1.036	0.484	0.544	0.409	0.455	0.529	0.453	0.465	0.548	0.592	1.203	1.648	1.095	1.155	1.02	1.066	1.141	1.064	1.076	1.16	1.204	1.814	1.205	0.652	0.712	0.577	0.623	0.698	0.621	0.633	0.717	0.761	1.371	0.745	0.301
CPI-SS08083B141	NRP1_SEMA3A	simple:O14786	simple:Q14563	NRP1	SEMA3A	True	True	False	curated	False	0.088	0.101	0.546	0.323	0.116	0.195	0.486	0.931	0.709	0.501	0.58	0.233	0.677	0.455	0.247	0.327	0.139	0.583	0.361	0.153	0.232	0.22	0.664	0.442	0.235	0.314	0.559	1.003	0.781	0.573	0.653	0.893	1.338	1.116	0.908	0.987	0.55	0.328	0.12
CPI-CS0E5D1ECCE	PlexinA1_complex3_SEMA3A	complex:PlexinA1_complex3	simple:Q14563	SEMA3A	True	True	False	curated	False	0.091	0.122	0.566	0.344	0.136	0.215	0.403	0.847	0.625	0.417	0.497	0.558	0.336	0.128	0.207	0.52	0.298	0.169	0.319	0.763	0.541	0.334	0.413	0.219	0.663	0.441	0.233	0.313	0.634	1.078	0.856	0.648	0.727	0.695	1.139	0.917	0.709	0.789	0.527	0.305
CPI-SS0B9E8C0DE	EPHB2_EFNB2	simple:P29323	simple:P52799	EPHB2	EFNB2	False	True	True	curated	False	0.091	0.327	0.337	0.457	1.412	0.325	0.305	0.346	0.302	0.554	0.565	0.685	1.639	0.552	0.532	0.573	0.529	0.241	0.252	0.372	1.326	0.239	0.219	0.261	0.217	0.646	0.657	0.777	1.731	0.644	0.624	0.665	0.621	0.24	0.251	0.371	1.325	0.238	0.218
CPI-SC0BC542ACC	TNC_a4b1	complex	simple:P24821	complex:a4b1	complex	TNC	True	False	False	curated	True	0.091	0.64	1.054	1.041	1.452	1.143	0.839	1.087	0.993	1.097	1.118	0.948	0.899	1.268	0.768	0.711	1.182	1.169	1.58	1.272	0.967	0.678	1.216	1.121	1.225	1.246	1.076	1.027	1.397	0.908	0.895	1.306	0.998	0.693	0.942	0.847	0.951	0.972
CPI-SS08A819670	CD70_GPRC5B	simple:P32970	simple:Q9NZH0	CD70	GPRC5B	True	False	True	InnateDB-All	False	0.091	1.165	0.29	0.241	0.596	0.21	1.928	1.052	1.003	1.359	0.973	1.184	0.308	0.26	0.615	0.229	2.32	1.444	1.395	1.751	1.365	1.072	0.503	1.448	0.573	0.524	0.879	0.493	1.11	0.235	0.541	1.324	0.448	0.399	0.755	0.369	1.426	0.551	0.502
CPI-CS0E80B08E2	IL21	receptor_IL21	complex:IL21	receptor	simple:Q9HBE4	IL21	True	True	False	curated	False	0.091	0.665	1.509	0.611	0.524	0.361	1.206	0.382	1.226	0.717	1.562	0.664	0.576	0.624	1.469	0.571	0.484	1.096	0.471	1.315	0.418	0.448	1.292	0.395	0.985	1.83	0.932	0.845	0.409	1.253	0.355	0.48	1.325	0.427	0.339	0.5	1.345	0.447
CPI-CS0A66DB1CA	CD8	receptor_LCK	complex:CD8	receptor	simple:P06239	LCK	False	True	False	curated	False	0.091	1.444	0.821	1.271	1.685	1.218	1.154	1.5	1.392	1.243	1.41	0.977	1.218	1.033	0.925	0.943	1.299	1.126	1.54	1.073	1.009	1.355	1.247	1.098	1.265	1.021	0.848	1.262	1.077	0.969	0.82	0.987	1.173	1.001	1.414	0.948	0.883	1.23
CPI-CS076E1A639	BMR1A_AVR2B_BMP6	complex:BMR1A_AVR2B	simple:P22004	BMP6	True	True	False	curated	False	0.091	0.438	0.793	0.446	0.472	0.14	0.495	0.148	0.174	0.537	0.892	0.545	0.571	0.741	1.096	0.749	0.775	0.244	0.598	0.251	0.278	0.272	0.626	0.279	0.306	0.151	0.506	0.159	0.185	0.224	0.578	0.231	0.258	0.212	0.567	0.22	0.247	0.14	0.494	0.147
CPI-SS07BECB892	EPHA2_EFNA3	simple:P29317	simple:P52797	EPHA2	EFNA3	False	True	False	curated	False	0.091	0.112	0.476	0.166	0.182	0.111	0.203	0.102	0.121	0.491	0.854	0.544	0.56	0.489	0.582	0.48	0.5	0.996	1.36	1.05	1.066	0.995	1.087	0.986	1.005	0.509	0.873	0.563	0.579	0.508	0.6	0.499	0.518	0.179	0.543	0.233	0.249	0.178	0.27
CPI-SS056BE1011	CCRL2_CCL19	simple:O00421	simple:Q99731	CCRL2	CCL19	True	True	False	guidetopharmacology.org	False	0.091	0.477	0.194	0.827	0.27	0.59	0.307	0.94	0.237	0.441	0.791	0.446	0.796	0.462	0.179	0.811	0.75	1.071	0.788	1.42	0.717	0.813	1.134	0.851	1.484	0.78	0.45	0.77	0.487	1.12	0.416	0.598	0.919	0.636	1.269	0.565	0.877	1.197	0.914
CPI-CS02AEFFE28	ACVR_1A2B	receptor_BMP6	complex:ACVR_1A2B	receptor	simple:P22004	BMP6	True	True	False	curated	False	0.091	0.438	0.793	0.446	0.472	0.14	0.495	0.148	0.174	0.537	0.892	0.545	0.571	0.741	1.096	0.749	0.775	0.244	0.598	0.251	0.278	0.272	0.626	0.279	0.306	0.151	0.506	0.159	0.185	0.224	0.578	0.231	0.258	0.212	0.567	0.22	0.247	0.14
CPI-SS0DA291AD9	GPR75_CCL5	simple:O95800	simple:P13501	GPR75	CCL5	True	True	False	guidetopharmacology.org	False	0.093	2.218	1.341	1.556	2.341	1.637	1.734	2.065	1.404	2.189	1.485	1.582	2.109	1.448	2.233	1.529	1.626	2.101	1.439	2.225	1.52	1.617	2.115	1.453	2.238	1.534	1.631	2.074	1.413	2.198	1.494	1.591	2.067	1.405	2.191	1.487	1.583	2.053	1.391
CPI-SS05B92CCC4	CCR3_CCL28	simple:P51677	simple:Q9NRJ3	CCR3	CCL28	True	True	False	guidetopharmacology.org	False	0.093	0.407	0.845	1.034	0.619	0.784	0.553	0.499	1.001	0.489	1.051	0.886	1.489	1.677	1.262	0.869	1.038	1.428	1.196	1.142	1.644	1.132	0.581	0.416	1.019	1.208	0.793	0.569	0.959	0.727	0.673	1.175	0.663	0.381	0.819	1.008	0.593	0.758	0.527
CPI-CS0EE8AEA34	IL13	receptor_IL13	complex:IL13	receptor	simple:P35225	IL13	True	True	False	curated	False	0.093	0.222	2.012	0.65	0.375	0.437	2.228	0.865	0.203	1.993	0.631	0.439	0.501	2.291	0.929	0.354	0.417	2.207	0.845	0.196	1.986	0.624	0.636	0.698	2.488	1.126	0.694	0.756	2.546	1.184	0.46	0.523	2.313	0.951	0.625	0.687	2.477	1.115
CPI-SS0B0CF0EDF	TNFSF15_TNFRSF25	simple:O95150	simple:Q93038	TNFSF15	TNFRSF25	True	False	True	guidetopharmacology.org	False	0.093	0.259	1.095	1.19	0.865	0.763	0.366	0.369	1.202	1.297	0.315	0.971	0.869	0.377	0.38	1.213	1.308	0.326	0.983	0.881	0.301	0.304	1.137	1.232	0.906	0.804	0.277	1.113	1.208	0.883	0.781	1.035	1.131	0.805	0.703	1	1.003	1.836	1.931
CPI-SS085195142	TYRO3_GAS6	simple:Q06418	simple:Q14393	TYRO3	GAS6	True	True	False	guidetopharmacology.org	False	0.095	0.403	1.267	0.415	0.313	0.439	0.222	0.148	0.419	1.282	0.431	0.329	0.454	0.237	0.163	0.365	1.228	0.377	0.275	0.4	0.183	0.383	1.247	0.395	0.293	0.419	0.202	0.381	1.244	0.393	0.291	0.416	0.199	0.549	0.84	1.703	0.852	0.57	0.75
CPI-SS0EA05941A	CCL5_CCR4	simple:P13501	simple:P51679	CCL5	CCR4	True	False	True	curated	False	0.095	2.126	2.105	2.131	3.118	2.249	2.649	2.085	1.432	2.242	1.373	1.773	1.31	1.464	1.443	1.469	2.456	1.587	1.988	1.424	2.249	2.228	2.255	3.242	2.373	2.773	2.209	1.801	1.332	1.545	1.524	1.551	2.538	1.669	2.069	1.505	1.642	1.621	1.647
CPI-SS034B442CE	TNF_CELSR2	simple:P01375	simple:Q9HCU4	TNF	CELSR2	True	False	True	InnateDB-All	False	0.095	0.387	0.844	0.389	0.363	0.362	0.484	0.941	0.486	0.7	0.755	0.42	0.877	0.422	0.704	0.72	0.573	0.572	0.694	1.151	0.696	0.76	0.613	0.612	0.734	1.191	0.736	0.448	0.905	0.45	0.723	0.464	0.462	0.585	1.042	0.587	0.751	0.81	0.711
CPI-SS0F1A060D4	PVR_NECTIN3	simple:P15151	simple:Q9NQS3	PVR	NECTIN3	True	True	False	curated	False	0.098	0.518	0.559	0.895	0.852	0.692	0.466	0.507	0.843	0.801	0.64	0.679	0.521	0.72	1.056	1.013	0.853	0.67	0.512	0.711	1.047	1.004	0.844	0.702	0.544	0.743	1.079	1.037	0.876	1.184	1.026	0.84	0.886	1.225	0.896	1.561	1.519	0.8	1.358
CPI-CS0AC5142FA	IL1	receptor	inhibitor_IL1A	complex:IL1	receptor	inhibitor	simple:P01583	IL1A	True	True	False	curated	False	0.098	0.19	0.699	0.687	0.764	0.767	0.741	0.702	0.749	0.576	0.565	0.641	0.645	0.619	0.579	0.626	0.232	0.221	0.298	0.301	0.275	0.235	0.283	0.906	0.894	0.971	0.974	0.948	0.909	0.956	0.375	0.364	0.44	0.444	0.418	0.378
CPI-SS0F21D6CA0	EPHB4_EFNB1	simple:P54760	simple:P98172	EPHB4	EFNB1	False	True	False	curated	False	0.098	1.073	1.058	1.393	1.201	1.058	1.375	1.217	1.067	1.131	1.314	1.533	0.408	0.392	0.727	0.535	0.392	0.709	0.552	0.401	0.465	0.649	0.867	0.408	0.216	0.39	0.232	0.146	0.329	0.548	0.401	0.21	0.383	0.226	0.139	0.323	0.541	0.409	0.218
CPI-SS07327E587	CD28_CD80	simple:P10747	simple:P33681	CD28	CD80	False	False	True	curated	False	0.098	0.375	0.39	0.386	0.373	0.494	0.876	0.912	0.358	0.739	0.775	0.718	0.754	1.051	1.066	1.061	1.049	1.17	1.551	1.587	0.372	0.476	0.857	0.893	0.605	0.641	0.646	0.682	0.91	0.926	0.921	0.909	1.029	1.411	1.447	0.851	0.867	0.862	0.85
CPI-SC0247E9ADB	COL9A2_a11b1	complex	simple:Q14055	complex:a11b1	complex	COL9A2	True	False	False	curated	True	0.098	0.687	0.259	1.288	0.276	0.732	0.303	1.333	0.32	0.576	0.148	1.178	0.165	0.507	1.108	0.095	0.721	0.293	1.322	0.31	0.518	1.12	0.107	1.343	0.915	1.945	0.932	1.12	0.691	1.721	0.708	0.499	1.1	0.088	0.535	0.107	1.137	0.124
CPI-SS00561BBD7	PVR_TIGIT	simple:P15151	simple:Q495A1	PVR	TIGIT	True	True	False	curated	False	0.098	0.913	0.584	1.263	0.957	0.861	0.533	1.211	0.905	1.074	0.746	1.424	0.558	1.118	0.489	0.533	1.065	0.737	1.415	0.55	1.109	0.48	0.525	1.097	0.769	1.447	0.582	1.141	0.512	0.557	1.579	0.851	1.251	1.929	1.064	1.623	0.994	0.914	1.039
CPI-SS0855C0353	NRP1_PGF	simple:O14786	simple:P49763	NRP1	PGF	True	True	False	curated	False	0.098	0.147	0.193	0.118	0.164	0.532	0.496	0.578	0.503	0.549	0.497	0.278	0.242	0.325	0.25	0.296	0.243	0.184	0.148	0.23	0.156	0.202	0.266	0.229	0.312	0.237	0.283	0.231	0.604	0.568	0.65	0.576	0.622	0.569	0.939	0.903	0.985	0.911	0.956
CPI-SS08F13AD5C	CD80_CD274	simple:P33681	simple:Q9NZQ7	CD80	CD274	False	True	True	curated	False	0.098	0.168	0.609	0.401	0.789	0.183	0.625	0.416	0.804	0.178	0.62	0.411	0.8	0.166	0.608	0.399	0.787	0.216	0.188	0.287	0.193	0.728	0.211	0.217	0.52	0.908	0.598	0.569	0.668	0.574	1.11	0.592	0.598	0.901	1.29	0.634	0.605	0.704	0.61
CPI-SS01E0F2D2C	NECTIN1_NECTIN4	simple:Q15223	simple:Q96NY8	NECTIN1	NECTIN4	True	True	True	curated	False	0.098	0.21	0.151	0.142	0.141	0.289	0.23	0.221	0.22	0.387	0.328	0.319	0.318	0.182	1.571	1.511	1.502	1.501	0.654	0.595	0.585	0.585	0.317	0.258	0.249	0.248	0.349	0.29	0.28	0.279	0.226	0.167	0.157	0.157	0.288	0.228	0.219	0.218	0.214
CPI-SS0470AF83E	EPHB1_EFNB1	simple:P54762	simple:P98172	EPHB1	EFNB1	False	True	False	curated	False	0.1	0.152	0.136	0.471	0.279	0.136	0.453	0.296	0.145	0.209	0.393	0.611	0.9	0.885	1.22	1.028	0.885	1.202	1.044	0.894	0.958	1.141	1.36	0.517	0.502	0.837	0.645	0.502	0.819	0.661	0.511	0.575	0.758	0.977	0.125	0.109	0.444	0.253	0.11
CPI-SC03DD946B2	TGFB2_TGFbeta	receptor1	simple:P61812	complex:TGFbeta	receptor1	TGFB2	True	False	True	curated	False	0.1	0.388	0.951	0.549	1.64	0.534	0.431	0.754	0.496	0.657	0.444	1.008	0.605	1.696	0.59	0.487	0.414	0.81	0.432	0.552	0.713	0.497	0.383	0.573	1.136	0.733	1.825	0.718	0.615	0.543	0.939	0.514	0.56	0.681	0.453	0.842	0.419	0.945
CPI-SS080683E15	CXCL10_CXCR3	simple:P02778	simple:P49682	CXCL10	CXCR3	True	False	True	curated	False	0.1	0.447	1.819	0.325	0.68	0.332	0.51	0.355	0.502	0.707	2.078	0.376	0.584	0.382	0.939	0.592	0.424	0.671	0.516	0.663	0.868	2.239	0.537	0.746	0.544	1.101	0.753	0.585	0.487	0.332	0.479	0.684	2.055	0.353	0.561	0.359	0.916	0.569	0.401
CPI-SC095A2C115	PLAUR_aVb3	complex	simple:Q03405	complex:aVb3	complex	PLAUR	True	True	False	curated	True	0.1	0.615	1.698	1.638	1.936	1.606	0.962	0.901	1.199	0.87	0.688	0.628	0.926	0.597	0.987	0.927	1.225	0.896	0.624	0.563	0.861	0.532	0.438	0.576	0.455	1.511	1.451	1.749	1.419	1.239	1.179	1.477	1.148	1.708	1.647	1.945	1.616	1.15
CPI-SS0320FFAFC	CTLA4_CD80	simple:P16410	simple:P33681	CTLA4	CD80	False	False	True	curated	False	0.1	0.214	0.23	0.225	0.212	0.333	0.715	0.751	0.271	0.652	0.688	0.224	0.24	0.235	0.223	0.344	0.725	0.761	1.619	1.634	1.63	1.617	1.738	2.12	2.156	0.292	0.307	0.303	0.29	0.411	0.793	0.829	0.344	0.36	0.355	0.343	0.464	0.845	0.881
CPI-SS076BC3BA6	HLA-DPB1_NRG1	simple:HLADPB1	simple:Q02297	HLA-DPB1	NRG1	True	True	True	InnateDB-All	False	0.1	1.482	1.847	1.775	1.038	2.065	2.43	2.358	2.718	3.082	3.01	1.045	1.41	1.338	1.284	1.649	1.577	1.892	2.257	2.185	1.222	1.587	1.515	1.133	1.061	1.092	1.457	1.385	1.16	1.088	1.968	2.333	2.261	2.237	2.601	2.529	1.079	1.444	1.372
CPI-SS003610FF9	CXCR3_CCL19	simple:P49682	simple:Q99731	CXCR3	CCL19	True	True	False	guidetopharmacology.org	False	0.1	0.295	0.615	0.333	0.965	0.262	0.461	0.81	0.287	0.607	0.325	0.957	0.254	0.492	0.812	0.529	1.162	0.459	1.863	2.184	1.901	2.533	1.83	0.482	0.831	0.369	0.69	0.407	1.039	0.336	0.488	0.838	0.724	1.045	0.762	1.394	0.691	0.377	0.697
CPI-SS003C9A532	NOTCH2_DLL3	simple:Q04721	simple:Q9NYJ7	NOTCH2	DLL3	False	True	False	curated	False	0.1	0.382	0.472	0.285	0.815	0.628	0.575	0.361	0.975	0.788	0.735	0.623	0.436	0.383	0.388	0.803	0.615	0.562	0.351	0.628	0.44	0.388	0.615	0.428	0.375	0.45	0.41	0.451	0.449	0.46	1.027	0.84	0.787	0.768	0.581	0.528	0.782	0.594	0.541
CPI-SC032246C72	TGFB2_TGFbeta	receptor2	simple:P61812	complex:TGFbeta	receptor2	TGFB2	True	False	True	curated	False	0.1	0.246	0.68	0.177	0.281	0.559	0.916	0.252	0.148	0.467	0.302	0.165	0.736	0.233	0.337	0.615	0.973	0.308	0.204	0.524	0.249	0.277	0.431	0.293	0.865	0.258	0.288	0.362	0.265	0.237	0.466	0.238	0.744	1.101	0.437	0.333	0.652	0.24
CPI-CS0E5078EDE	BMR1A_AVR2B_GDF7	complex:BMR1A_AVR2B	simple:Q7Z4P5	GDF7	True	True	False	curated	False	0.1	1.076	0.918	0.371	0.728	0.364	0.778	0.62	0.43	1.175	1.017	0.47	0.827	0.463	1.379	1.221	0.674	1.031	0.668	0.882	0.724	0.176	0.533	0.17	0.91	0.752	0.204	0.561	0.198	0.789	0.631	0.441	0.862	0.704	0.156	0.513	0.15	0.85	0.693	0.145
CPI-SS0315F51DD	CXCL8_CXCR2	simple:P10145	simple:P25025	CXCL8	CXCR2	True	False	True	curated	False	0.102	2.058	0.753	4.846	3.018	3.541	3.121	3.039	2.436	0.608	1.13	0.711	0.629	1.927	0.622	1.981	0.675	1.991	0.686	2.176	0.87	2.773	0.946	1.468	1.049	0.966	2.768	0.94	1.463	1.043	0.961	3.358	1.53	2.052	1.633	1.551	2.582	0.755	1.277
CPI-SC0FA79E269	COL4A2_a10b1	complex	simple:P08572	complex:a10b1	complex	COL4A2	True	False	False	curated	True	0.102	0.162	0.444	0.207	0.574	1.148	0.185	0.151	0.124	0.406	0.17	0.536	1.11	0.147	0.378	0.141	0.508	1.081	0.136	0.418	0.181	0.548	1.121	0.159	0.125	0.175	0.457	0.221	0.587	1.161	0.198	0.164	0.676	0.958	0.722	1.088	1.662	0.699
CPI-SS0698C4DC4	CXCL8_CXCR1	simple:P10145	simple:P25024	CXCL8	CXCR1	True	False	True	curated	False	0.102	1.897	0.855	4.684	3.076	3.642	3.119	3.022	2.274	0.666	1.232	0.709	0.612	1.766	0.724	1.819	0.777	1.83	0.787	2.014	0.972	2.612	1.004	1.57	1.046	0.95	2.606	0.998	1.564	1.041	0.944	3.196	1.588	2.154	1.631	1.534	2.421	0.813	1.378
CPI-SC07222A428	COL4A2_a2b1	complex	simple:P08572	complex:a2b1	complex	COL4A2	True	False	False	curated	True	0.102	0.265	0.179	0.214	0.78	0.313	0.3	0.219	0.227	0.742	0.275	0.263	0.182	0.199	0.714	0.247	0.234	0.153	0.239	0.153	0.188	0.754	0.287	0.274	0.193	0.278	0.192	0.228	0.793	0.326	0.314	0.233	0.779	0.693	0.729	1.294	0.827	0.815
CPI-SC0EAF80261	SEMA7A_a1b1	complex	simple:O75326	complex:a1b1	complex	SEMA7A	False	False	False	curated	True	0.102	0.816	0.837	0.743	0.704	0.689	0.701	1.392	0.71	0.748	0.957	0.918	0.903	0.915	1.606	0.924	0.963	1.608	1.569	1.554	1.566	2.257	1.575	1.614	0.664	0.625	0.61	0.623	1.313	0.631	0.67	0.427	0.388	0.373	0.385	1.075	0.394	0.432
CPI-SS01A8F745A	EPHA1_EFNA3	simple:P21709	simple:P52797	EPHA1	EFNA3	False	True	False	curated	False	0.102	0.393	0.756	0.447	0.463	0.391	0.484	0.383	0.402	0.332	0.696	0.386	0.402	0.331	0.424	0.322	0.342	0.214	0.577	0.267	0.283	0.212	0.305	0.203	0.223	0.25	0.614	0.304	0.32	0.249	0.341	0.24	0.26	0.309	0.673	0.363	0.379	0.308	0.4
CPI-SC0F73E9099	COL1A1_a1b1	complex	simple:P02452	complex:a1b1	complex	COL1A1	True	False	False	curated	True	0.102	0.821	0.368	0.329	0.314	0.326	1.017	0.335	0.374	0.367	0.328	0.313	0.325	1.016	0.334	0.373	0.826	0.829	0.588	0.549	0.535	0.547	1.237	0.555	0.594	0.333	0.294	0.291	0.981	0.3	0.338	0.392	0.353	0.338	0.35	1.04	0.359	0.397
CPI-SC01833C7FC	PLA2G2A_a4b1	complex	simple:P14555	complex:a4b1	complex	PLA2G2A	True	False	False	curated	True	0.104	1.952	1.733	1.894	1.589	2.365	2.352	2.763	1.732	1.836	1.803	2.455	2.151	1.862	2.399	2.304	1.798	2.408	2.43	2.26	2.211	2.58	0.697	1.11	1.098	1.508	1.2	0.896	1.144	1.05	1.154	1.175	1.005	0.956	1.325	0.9	0.887	1.298
CPI-SS0B99F22A2	JAG1_NOTCH3	simple:P78504	simple:Q9UM47	JAG1	NOTCH3	False	False	True	curated	False	0.104	0.304	0.483	0.606	0.304	0.909	0.502	0.213	0.392	0.515	0.214	0.818	0.411	1.314	1.493	1.616	1.314	1.919	1.512	0.465	0.644	0.767	0.465	1.07	0.663	0.329	0.452	0.754	0.347	0.254	0.433	0.556	0.254	0.858	0.451	0.192	0.371	0.494	0.192
CPI-CS0AB9C7139	IL7	receptor_IL7	complex:IL7	receptor	simple:P13232	IL7	True	True	False	curated	False	0.104	0.993	1.107	0.672	0.664	0.843	1.376	0.748	0.942	0.933	0.715	0.72	0.738	0.795	2.546	1.917	2.111	2.102	1.884	1.889	1.907	1.964	1.347	0.718	0.913	0.904	0.685	0.691	0.708	0.765	2.579	1.95	2.144	2.136	1.917	1.922	1.94	1.997
CPI-SS03A4F7DC8	AXL_GAS6	simple:P30530	simple:Q14393	AXL	GAS6	True	True	False	guidetopharmacology.org	False	0.104	0.382	1.246	0.394	0.292	0.418	0.201	0.169	0.46	1.324	0.473	0.19	0.37	0.496	0.279	0.205	0.188	0.211	0.502	1.366	0.515	0.232	0.412	0.538	0.321	0.247	0.23	0.599	0.89	1.753	0.902	0.619	0.8	0.925	0.708	0.634	0.617	1.112	1.402
CPI-SS0A83A7E30	TNFSF13_FAS	simple:O75888	simple:P25445	TNFSF13	FAS	True	False	True	I2D,InnateDB-All	False	0.104	0.661	0.919	1.391	0.625	0.53	0.761	0.872	1.034	0.635	0.893	1.365	0.599	0.503	0.735	0.845	1.008	0.516	0.774	1.247	0.617	0.727	0.889	0.614	0.872	1.345	0.579	0.483	0.714	0.825	0.987	0.564	0.822	1.294	0.528	0.433	0.664	0.775	0.937
CPI-CS05789C9A0	BMR1A_ACR2A_GDF7	complex:BMR1A_ACR2A	simple:Q7Z4P5	GDF7	True	True	False	curated	False	0.104	0.83	0.672	0.482	0.784	0.626	0.436	0.799	0.641	0.451	0.91	0.752	0.205	0.562	0.199	0.8	0.642	0.452	0.83	0.672	0.482	1.015	0.858	0.31	0.667	0.304	0.822	0.664	0.473	0.847	0.689	0.142	0.499	0.831	0.673	0.483	0.8	0.643	0.452	0.893
CPI-CS067298D94	FLT1	complex_VEGFA	complex:FLT1	complex	simple:P15692	VEGFA	True	True	False	curated	False	0.104	0.63	0.279	0.816	0.91	0.51	0.625	0.79	0.623	0.273	0.809	0.903	0.503	0.618	0.783	0.621	0.807	0.901	0.501	0.616	0.781	1.216	1.23	1.144	1.158	1.174	1.686	1.335	1.177	1.871	1.965	1.566	1.681	1.845	0.681	0.695	0.608	0.623
CPI-SS0E2863F09	TNFRSF17_TNFSF13B	simple:Q02223	simple:Q9Y275	TNFRSF17	TNFSF13B	True	True	False	curated	False	0.104	1.05	0.564	0.358	0.428	0.537	0.353	0.568	0.408	1.21	0.886	1.404	1.065	1.116	1.268	0.782	0.576	0.646	0.755	0.57	0.786	0.626	1.427	1.104	1.622	1.282	1.333	1.72	1.234	1.028	1.098	1.207	1.022	1.238	1.078	1.88	1.556	2.074	1.735
CPI-SS0C4D54E39	NOTCH3_JAG2	simple:Q9UM47	simple:Q9Y219	NOTCH3	JAG2	False	True	False	curated	False	0.104	0.359	0.345	0.399	0.355	0.432	0.538	0.524	0.274	0.258	0.308	0.578	0.534	0.611	0.269	0.661	0.647	0.397	0.381	0.431	0.701	0.657	0.734	0.392	0.359	0.345	0.4	0.355	0.433	0.963	0.95	0.7	0.684	0.734	1.004	0.96	1.037	0.694	0.556
CPI-SS00A6D366F	ADORA2A_NAMPT	simple:P29274	simple:P43490	ADORA2A	NAMPT	True	True	False	I2D,IMEx,InnateDB-All,MINT	False	0.104	2.566	1.457	1.639	1.339	2.039	1.691	2.195	1.922	2.159	2.48	1.37	1.552	1.252	1.952	1.605	2.108	1.835	2.072	2.548	1.439	1.621	1.32	2.021	1.673	2.176	1.904	2.141	1.366	1.384	2.821	1.711	1.373	1.893	1.235	1.345	1.593	1.372	1.316
CPI-SC0F590482E	COL9A2_a1b1	complex	simple:Q14055	complex:a1b1	complex	COL9A2	True	False	False	curated	True	0.104	0.341	0.301	0.287	0.299	0.989	0.307	0.346	0.385	0.346	0.331	0.343	1.034	0.352	0.391	0.23	0.879	0.236	0.809	0.375	0.336	0.321	0.333	1.023	0.341	0.38	0.821	0.997	0.958	0.943	0.955	1.646	0.964	1.002	0.773	0.734	0.719	0.731
CPI-SS0C03F7CDC	VEGFA_KDR	simple:P15692	simple:P35968	VEGFA	KDR	True	False	True	curated	False	0.104	1.216	0.681	1.23	0.695	1.144	0.608	1.158	0.623	1.174	0.639	0.63	0.623	0.621	1.686	1.15	0.279	0.273	1.335	0.8	1.177	0.641	0.816	0.809	0.807	1.871	1.336	0.91	0.903	0.901	1.965	1.43	0.51	0.503	0.501	1.566	1.03	0.625	0.618
CPI-CS085E95BC1	IL1	receptor	inhibitor_IL1RN	complex:IL1	receptor	inhibitor	simple:P18510	IL1RN	True	True	False	curated	False	0.107	0.785	0.739	1.31	0.4	0.7	0.855	0.714	1.359	1.313	1.884	0.974	1.275	1.429	0.591	1.236	1.19	1.761	0.851	1.152	1.306	0.893	0.847	1.418	0.508	0.808	0.962	0.921	1.566	1.52	2.091	1.181	1.481	1.636	0.39	1.035
CPI-SS0C6311D2D	CCL3L1_CCR3	simple:P16619	simple:P51677	CCL3L1	CCR3	True	False	True	curated	False	0.107	0.509	1.153	0.683	0.483	0.968	0.499	0.89	0.869	0.717	1.361	0.891	0.691	0.881	0.889	0.909	0.888	1.531	1.062	0.862	0.486	1.13	0.66	0.46	0.796	1.439	0.97	0.77	0.566	1.209	0.74	0.54	0.488	1.131	0.662	0.461	0.677	1.321	0.851
CPI-SS0C9696AAA	CRTAM_CADM1	simple:O95727	simple:Q9BY67	CRTAM	CADM1	False	False	False	curated	False	0.107	1.105	2.301	1.254	1.609	1.098	1.581	1.155	1.398	0.707	0.678	1.353	0.662	0.633	1.493	0.802	0.773	1.308	0.617	0.588	1.601	0.554	0.909	0.881	1.546	0.5	0.855	0.826	0.825	2.021	0.975	1.33	0.819	1.301	0.876	1.343	0.652	0.623	1.535
CPI-CS091BF99D0	ACVR_1A2A	receptor_INHBA	complex:ACVR_1A2A	receptor	simple:P08476	INHBA	True	True	False	curated	False	0.109	0.357	0.949	0.171	0.182	0.312	0.903	0.137	0.326	0.918	0.151	0.438	1.03	0.252	0.263	0.327	0.919	0.357	0.949	0.171	0.182	0.543	1.135	0.357	0.368	0.349	0.941	0.163	0.174	0.374	0.966	0.188	0.199	0.358	0.95	0.172	0.183	0.328
CPI-CS0533A30DC	ACVR_1B2A	receptor_INHBA	complex:ACVR_1B2A	receptor	simple:P08476	INHBA	True	True	False	curated	False	0.109	0.357	0.949	0.171	0.182	0.312	0.903	0.137	0.326	0.918	0.151	0.438	1.03	0.252	0.263	0.327	0.919	0.357	0.949	0.171	0.182	0.543	1.135	0.357	0.368	0.349	0.941	0.163	0.174	0.374	0.966	0.188	0.199	0.358	0.95	0.172	0.183	0.328
CPI-SC03DD752AB	COL4A4_a2b1	complex	simple:P53420	complex:a2b1	complex	COL4A4	True	False	False	curated	True	0.109	0.887	0.801	0.837	1.402	0.935	0.923	0.842	0.922	0.836	0.872	1.437	0.97	0.958	0.877	0.34	0.254	0.289	0.855	0.388	0.375	0.294	0.215	0.729	0.262	0.25	0.778	0.692	0.728	1.293	0.826	0.814	0.733	0.533	0.446	0.482	1.047	0.58
CPI-SC00C0800EB	COL4A4_a10b1	complex	simple:P53420	complex:a10b1	complex	COL4A4	True	False	False	curated	True	0.109	0.784	1.066	0.83	1.196	1.77	0.807	0.773	0.819	1.101	0.865	1.231	1.805	0.842	0.808	0.237	0.519	0.282	0.649	1.223	0.26	0.226	0.394	0.157	0.524	1.097	0.675	0.957	0.721	1.087	1.661	0.698	0.664	0.429	0.712	0.475	0.842	1.415
CPI-CS0924060DB	ACVR_1C2A	receptor_INHBA	complex:ACVR_1C2A	receptor	simple:P08476	INHBA	True	True	False	curated	False	0.109	0.357	0.949	0.171	0.182	0.312	0.903	0.137	0.326	0.918	0.151	0.438	1.03	0.252	0.263	0.327	0.919	0.357	0.949	0.171	0.182	0.543	1.135	0.357	0.368	0.349	0.941	0.163	0.174	0.374	0.966	0.188	0.199	0.358	0.95	0.172	0.183	0.328
CPI-SC03ADD2063	COL18A1_a11b1	complex	simple:P39060	complex:a11b1	complex	COL18A1	True	False	False	curated	True	0.109	0.84	0.412	1.442	0.429	0.626	1.227	0.763	1.364	0.352	0.819	0.39	1.42	0.407	0.57	1.171	0.881	0.452	1.482	0.469	0.997	0.568	1.598	0.585	1.278	0.849	1.879	0.866	0.663	1.264	0.882	0.453	1.483	0.47	0.878	0.45	1.479	0.467
CPI-SS00BD8FF72	POMC_MC1R	simple:P01189	simple:Q01726	POMC	MC1R	True	False	True	guidetopharmacology.org	False	0.109	0.788	1.265	0.442	0.414	0.487	0.964	0.741	1.219	0.479	0.957	1.079	1.556	0.733	0.705	0.649	1.127	0.693	1.17	0.698	1.175	0.512	0.99	0.68	1.157	1.054	1.531	0.708	0.68	1.121	1.598	0.775	0.747	0.554	1.031	0.801	1.278	0.455	0.427
CPI-SS0A4EE6FE1	LRP5_FAM3B	simple:O75197	simple:P58499	LRP5	FAM3B	True	True	False	InnateDB-All	False	0.109	0.207	1.037	0.231	0.255	0.198	0.402	0.207	0.451	1.281	0.474	0.498	0.442	0.646	0.451	0.93	1.759	0.953	0.977	0.92	1.124	0.929	0.417	1.247	0.44	0.464	0.407	0.612	0.416	0.111	0.941	0.135	0.159	0.306	0.111	0.107	0.937	0.13	0.154
CPI-SS0A28DCA72	CXCL12_CXCR4	simple:P48061	simple:P61073	CXCL12	CXCR4	True	False	True	curated	False	0.111	1.791	1.546	1.633	1.667	1.756	1.712	1.859	1.87	1.624	1.498	1.712	1.745	1.834	1.791	1.938	2.283	2.038	1.708	1.737	1.912	2.125	2.158	1.761	2.247	2.204	1.801	2.351	1.558	1.615	2.794	1.929	2.548	1.947	2.218	2.247	2.422	2.636	1.869
CPI-SC0A2FE9693	LAMC1_a7b1	complex	simple:P11047	complex:a7b1	complex	LAMC1	True	False	False	curated	True	0.111	0.734	0.89	0.793	0.837	1.272	0.776	0.296	0.452	0.355	0.399	0.834	0.338	0.996	1.152	1.055	1.099	1.534	1.038	0.221	0.124	0.168	0.603	0.248	0.151	0.195	0.63	0.134	0.242	0.145	0.189	0.625	0.129	0.13	0.286	0.189	0.233	0.668
CPI-SS0889E281D	CADM1_CADM1	simple:Q9BY67	simple:Q9BY67	CADM1	CADM1	False	False	False	curated	False	0.111	0.148	1.344	0.298	0.652	0.141	0.624	0.198	1.344	2.54	1.494	1.848	1.337	1.82	1.394	0.298	1.494	0.447	0.802	0.291	0.774	0.348	0.652	1.848	0.802	1.157	0.646	1.128	0.703	0.141	1.337	0.291	0.646	0.135	0.617	0.192	0.624	1.82	0.774
CPI-SC0077CEB82	TGFB3_TGFbeta	receptor2	simple:P10600	complex:TGFbeta	receptor2	TGFB3	True	False	True	curated	False	0.111	0.289	0.723	0.324	0.602	0.96	0.295	0.511	0.29	0.724	0.325	0.603	0.96	0.296	0.511	0.313	0.747	0.244	0.348	0.626	0.983	0.319	0.215	0.534	0.332	0.766	0.264	0.367	0.646	1.003	0.338	0.234	0.554	0.249	0.276	0.431	0.293	0.864
CPI-SC08B2AD7C6	FN1_a5b1	complex	simple:P02751	complex:a5b1	complex	FN1	True	False	False	curated	True	0.111	0.296	0.675	0.43	0.705	0.992	0.3	0.679	0.433	0.709	0.996	0.442	0.382	0.425	0.407	0.362	0.474	0.375	0.539	0.354	0.918	0.673	0.948	0.436	1.235	1.379	1.319	1.362	1.345	1.3	1.411	1.313	1.477	1.292	1.856	1.61	1.885	1.373
CPI-SS048242083	HLA-F_KIR3DL1	simple:P30511	simple:P43629	HLA-F	KIR3DL1	False	False	True	curated	False	0.111	1.208	1.314	1.39	1.941	1.403	1.592	1.134	1.104	1.655	1.214	1.319	1.395	1.946	1.144	1.25	1.326	1.877	1.35	1.178	1.285	1.16	1.266	1.342	1.893	1.245	1.35	1.426	1.977	1.065	1.17	1.246	1.797	1.061	1.166	1.242	1.793	1.336	1.441
CPI-SS03E273233	ADORA2A_ENTPD1	simple:P29274	simple:P49961	ADORA2A	ENTPD1	False	True	False	curated	False	0.113	0.314	0.275	0.297	0.962	0.594	0.486	0.3	0.596	0.554	0.555	0.648	0.627	0.762	0.324	0.875	0.508	0.399	0.51	0.468	0.468	0.561	0.54	0.675	0.295	0.256	0.279	0.944	0.576	0.467	0.578	0.536	0.537	0.63	0.608	0.743	0.306	0.568	0.529
CPI-SC0C6B54D7A	THY1_aXb2	complex	simple:P04216	complex:aXb2	complex	THY1	False	False	False	curated	True	0.113	0.799	0.869	0.723	1.397	1.197	1.178	0.931	1.513	0.836	0.716	1.217	1.287	0.708	0.871	0.65	0.641	0.697	1.141	1.815	1.615	1.596	1.349	1.931	0.717	0.788	0.641	1.315	1.115	1.096	0.849	1.431	0.545	0.926	0.997	0.581	0.85	1.524
CPI-SC0A05D3880	THY1_aMb2	complex	simple:P04216	complex:aMb2	complex	THY1	False	False	False	curated	True	0.113	0.441	0.341	0.729	0.592	0.539	1.106	0.569	0.768	0.608	0.647	0.859	0.759	0.702	0.618	0.672	1.147	1.011	0.957	1.524	0.987	1.186	0.359	0.648	0.511	0.457	1.024	0.487	0.686	0.317	0.357	0.568	0.468	0.411	0.327	0.381	0.857	0.72
CPI-SS07D56EB05	CMKLR1_RARRES2	simple:Q99788	simple:Q99969	CMKLR1	RARRES2	True	True	False	guidetopharmacology.org	False	0.113	1.72	0.802	0.46	0.424	1.691	0.773	0.431	0.395	0.585	0.571	2.175	0.626	1.257	0.915	0.879	1.707	0.789	0.446	0.41	0.398	0.384	1.989	0.439	1.071	0.728	0.692	0.573	0.559	2.164	0.615	1.246	0.903	0.867	1.706	0.788	0.445	0.409	0.938
CPI-SS00046DCF3	EPHA4_EFNB1	simple:P54764	simple:P98172	EPHA4	EFNB1	False	True	False	curated	False	0.113	0.459	0.267	0.441	0.284	0.197	0.381	0.599	0.416	0.225	0.398	0.241	0.155	0.338	0.556	0.409	0.218	0.391	0.234	0.331	0.549	0.413	0.222	0.395	0.238	0.335	0.554	0.477	0.286	0.459	0.302	0.215	0.399	0.617	0.406	0.215	0.389	0.231	0.328
CPI-SC0D5CFA431	TGFB3_TGFbeta	receptor1	simple:P10600	complex:TGFbeta	receptor1	TGFB3	True	False	True	curated	False	0.116	0.995	0.592	1.683	0.577	0.474	0.797	0.539	0.7	0.995	0.592	1.683	0.577	0.474	0.798	0.54	0.701	0.455	1.018	0.616	1.707	0.601	0.497	0.821	0.442	0.563	0.724	0.474	1.038	0.635	1.726	0.62	0.517	0.444	0.841	0.462	0.582	0.743
CPI-CS06D50EBF8	OSMR_OSM	complex:OSMR	simple:P13725	OSM	True	True	False	curated	False	0.116	0.342	2.049	0.368	0.434	0.358	0.411	0.368	0.843	0.616	1.134	0.724	0.921	1.952	0.337	0.314	0.271	0.746	0.52	1.038	0.627	0.824	0.57	2.277	0.596	0.662	0.586	0.64	0.596	1.072	0.845	1.363	0.952	1.149	1.129	2.835	1.154	1.22	1.144	1.198
CPI-SS016EE0084	PDCD1_CD274	simple:Q15116	simple:Q9NZQ7	PDCD1	CD274	False	True	True	curated	False	0.116	0.552	0.523	0.622	0.528	1.064	0.546	0.552	0.855	1.243	0.677	0.469	0.857	0.6	0.391	0.779	0.719	0.511	0.899	1.094	1.065	1.164	1.07	1.606	1.088	1.095	1.397	1.786	0.272	0.343	0.784	0.273	0.576	0.964	0.516	0.487	0.586	0.492	1.028
CPI-SS076FEB261	FLT3_FLT3LG	simple:P36888	simple:P49771	FLT3	FLT3LG	True	True	False	curated	False	0.116	1.322	1.229	1.309	1.807	1.356	1.79	1.461	1.954	1.218	1.76	0.722	0.629	0.709	1.207	0.756	1.189	0.861	1.354	0.618	1.16	0.346	0.333	0.831	0.38	0.814	0.485	0.978	0.784	0.772	0.754	0.426	0.919	0.725	0.335	0.322	0.82	0.369	0.803
CPI-CS0FFBA02F8	ACVR_1A2A	receptor_BMP6	complex:ACVR_1A2A	receptor	simple:P22004	BMP6	True	True	False	curated	False	0.116	0.192	0.547	0.2	0.226	0.146	0.501	0.154	0.18	0.161	0.516	0.169	0.195	0.272	0.627	0.28	0.306	0.517	0.17	0.196	0.192	0.546	0.199	0.226	0.377	0.732	0.385	0.412	0.184	0.538	0.191	0.218	0.209	0.564	0.217	0.243	0.193	0.547
CPI-SS081AD39D7	PECAM1_CD177	simple:P16284	simple:Q8N6Q3	PECAM1	CD177	False	True	False	curated	False	0.116	2.166	0.568	0.526	0.431	1.944	1.946	1.938	2.353	0.754	0.712	0.617	2.337	0.739	0.697	0.602	1.904	2.337	0.738	0.697	0.601	1.958	1.912	2.048	0.449	2.163	0.564	0.522	0.427	1.971	1.966	1.966	2.662	1.064	1.022	0.927	2.423	0.825	0.783
CPI-CS0247DA882	BMR1A_ACR2A_BMP6	complex:BMR1A_ACR2A	simple:P22004	BMP6	True	True	False	curated	False	0.116	0.192	0.547	0.2	0.226	0.146	0.501	0.154	0.18	0.161	0.516	0.169	0.195	0.272	0.627	0.28	0.306	0.517	0.17	0.196	0.192	0.546	0.199	0.226	0.377	0.732	0.385	0.412	0.184	0.538	0.191	0.218	0.209	0.564	0.217	0.243	0.193	0.547	0.2	0.227
CPI-SS0B990492C	CADM1_NECTIN3	simple:Q9BY67	simple:Q9NQS3	CADM1	NECTIN3	False	False	False	curated	False	0.116	0.515	0.557	0.892	0.85	0.689	1.711	1.554	1.368	1.413	1.753	1.423	2.089	2.046	1.328	1.885	0.665	0.507	0.706	1.042	1	0.839	1.02	0.862	0.676	0.722	1.061	0.731	1.397	1.354	0.636	1.194	0.509	0.55	0.886	0.843	0.683	0.991	0.834
CPI-SC058F72F90	FBN1_a5b1	complex	simple:P35555	complex:a5b1	complex	FBN1	True	False	False	curated	True	0.118	0.765	0.705	0.748	0.73	0.686	0.797	0.698	0.863	0.678	1.242	0.996	1.271	0.759	1.558	0.498	0.438	0.481	0.463	0.419	0.53	0.431	0.596	0.411	0.975	0.729	1.004	0.492	1.291	0.646	0.586	0.629	0.612	0.567	0.678	0.58	0.744	0.559
CPI-SC0E3784FFB	LAMC1_a2b1	complex	simple:P11047	complex:a2b1	complex	LAMC1	True	False	False	curated	True	0.118	0.864	0.777	0.813	1.378	0.911	0.899	0.818	0.426	0.339	0.375	0.94	0.473	0.461	0.38	1.126	1.04	1.075	1.64	1.174	1.161	1.08	0.195	0.709	0.242	0.23	0.222	0.736	0.27	0.257	0.176	0.216	0.731	0.264	0.252	0.26	0.173	0.209
CPI-SS0FB5FE587	DLL1_NOTCH4	simple:O00548	simple:Q99466	DLL1	NOTCH4	False	False	True	curated	False	0.118	0.265	0.694	0.624	0.309	1.765	0.628	0.43	0.45	0.232	0.503	0.249	0.528	0.284	1.058	1.487	1.417	1.102	2.558	1.421	1.224	1.243	1.025	1.296	1.042	1.321	1.077	0.257	0.685	0.616	0.3	1.756	0.619	0.422	0.441	0.223	0.494	0.24	0.52
CPI-SS002673EFE	WNT5A_FZD3	simple:P41221	simple:Q9NPG1	WNT5A	FZD3	True	False	True	curated	False	0.118	0.617	0.586	1.068	1.301	0.629	0.684	1.963	1.339	0.672	0.83	0.485	0.95	0.668	0.611	0.743	0.72	0.47	0.704	0.936	0.319	1.598	0.974	0.307	0.465	0.585	0.304	0.379	0.355	0.291	0.742	0.975	0.302	0.358	1.637	1.012	0.345	0.504	0.624
CPI-SS0E00478B4	NRP2_VEGFA	simple:O60462	simple:P15692	NRP2	VEGFA	True	True	False	curated	False	0.12	0.666	0.316	0.852	0.946	0.546	0.661	0.826	0.395	0.409	0.322	0.337	0.353	0.865	0.514	0.355	1.05	1.144	0.745	0.86	1.024	1.077	1.091	1.004	1.019	1.035	1.546	1.196	1.037	1.732	1.826	1.427	1.542	1.706	0.824	0.839	0.752	0.767	0.783
CPI-SS0ABD11350	HLA-C_KIR2DL1	simple:HLAC	simple:P43626	HLA-C	KIR2DL1	False	True	True	curated	False	0.12	2.124	2.186	2.562	2.742	2.219	2.4	2.309	2.489	2.403	2.583	2.06	2.122	2.497	2.677	2.157	2.219	2.594	2.774	2.05	2.23	2.205	2.132	2.068	2.443	2.624	2.053	2.428	2.608	2.132	2.195	2.57	2.75	2.01	2.073	2.448	2.628	2.096	2.158
CPI-SC04F2478E9	FN1_a3b1	complex	simple:P02751	complex:a3b1	complex	FN1	True	False	False	curated	True	0.12	0.515	0.543	0.335	0.616	0.408	0.519	0.547	0.339	0.62	0.412	0.466	0.395	0.37	0.758	0.786	0.414	0.494	0.464	0.578	0.859	0.36	0.651	0.358	0.395	0.364	1.404	1.333	1.307	1.696	1.723	1.352	1.432	1.402	1.516	1.797	1.298	1.588
CPI-SC0EA3FC100	COL18A1_a1b1	complex	simple:P39060	complex:a1b1	complex	COL18A1	True	False	False	curated	True	0.12	0.494	0.455	0.452	1.143	0.461	0.5	0.928	1.065	0.472	1.121	0.439	0.478	0.872	0.534	0.495	0.48	0.492	1.183	0.501	0.54	0.65	0.611	0.596	0.609	1.299	0.617	0.656	0.931	0.892	0.878	0.89	1.58	0.898	0.937	0.965	0.535	0.496
CPI-SS066FE05CA	LEP_LEPR	simple:P41159	simple:P48357	LEP	LEPR	True	False	True	curated	False	0.12	0.285	0.304	0.319	0.39	0.338	0.359	0.284	0.315	0.293	0.448	0.56	0.546	0.701	0.535	0.412	0.202	0.221	0.236	0.307	0.254	0.276	0.201	0.232	0.21	0.365	0.476	0.463	0.618	0.452	0.328	0.236	0.204	0.294	0.405	0.391	0.547	0.38	0.257
CPI-SC0E8575642	ICAM3_aDb2	complex	simple:P32942	complex:aDb2	complex	ICAM3	False	False	False	curated	True	0.122	0.845	0.779	0.734	1.417	0.847	0.781	0.736	1.419	0.955	1.235	1.168	1.124	1.806	1.042	0.975	0.931	1.613	1.131	1.065	1.02	1.703	0.885	0.824	0.758	1.396	1.186	1.12	1.075	1.758	0.989	0.922	0.878	1.561	0.835	0.769	0.724	1.407
CPI-SS0FBC9234C	TNF_PTPRS	simple:P01375	simple:Q13332	TNF	PTPRS	True	False	True	InnateDB-All	False	0.122	0.373	1.035	0.748	0.333	0.47	1.132	0.845	0.43	0.892	0.605	0.947	0.66	0.406	1.068	0.782	0.367	0.895	0.609	0.911	0.624	0.68	1.342	1.056	0.641	0.289	0.951	0.665	0.72	1.382	1.095	0.681	0.434	1.096	0.81	0.395	0.914	0.627	0.57
CPI-CS04CBDE052	IL10	receptor_IL10	complex:IL10	receptor	simple:P22301	IL10	True	True	False	curated	False	0.122	0.627	0.755	0.527	1.576	0.45	0.629	0.757	0.53	1.579	0.453	0.321	0.824	0.952	0.724	1.773	0.647	0.623	0.75	0.523	1.572	0.446	0.671	0.799	0.572	1.621	0.495	0.528	1.031	1.159	0.931	1.98	0.854	0.758	0.886	0.658	1.707	0.581
CPI-SS0CBC7840D	PTPRC_CD22	simple:P08575	simple:P20273	PTPRC	CD22	False	False	True	curated	False	0.122	2.491	1.72	1.875	1.765	1.733	1.799	2.015	1.847	1.738	1.93	2.078	1.462	2.335	1.564	1.719	1.609	1.578	1.643	1.911	2.222	1.451	1.605	1.495	1.464	1.53	2.383	1.612	1.766	1.656	1.625	1.691	2.26	1.489	1.644	1.534	1.503	1.568	2.309
CPI-SC01EA4FF6B	COL1A1_a2b1	complex	simple:P02452	complex:a2b1	complex	COL1A1	True	False	False	curated	True	0.122	0.73	0.263	0.251	0.411	0.324	0.36	0.925	0.458	0.446	0.365	0.409	0.323	0.359	0.924	0.457	0.445	0.364	0.735	0.268	0.255	0.737	0.27	0.258	0.631	0.545	0.58	1.146	0.679	0.666	0.585	0.375	0.289	0.325	0.89	0.423	0.411	0.33
CPI-CS0210859AB	GMCSFR_CSF2	complex:GMCSFR	simple:P04141	CSF2	True	True	False	curated	False	0.122	0.38	1.66	0.859	0.308	1.589	0.787	0.341	1.621	0.82	1.213	1.084	2.494	1.692	1.018	1.042	0.739	0.61	2.02	1.218	0.544	0.567	0.325	1.606	0.804	0.868	0.739	2.149	1.347	0.673	0.697	0.862	0.732	2.142	1.341	0.666	0.69	0.684	0.555	1.965
CPI-SS0CBAA9BCC	HLA-A_KIR3DL1	simple:HLAA	simple:P43629	HLA-A	KIR3DL1	False	True	True	curated	False	0.122	2.095	2.2	2.276	2.827	1.94	2.407	2.138	1.953	2.504	1.972	2.077	2.153	2.704	2.209	2.314	2.39	2.941	2.166	2.04	2.036	1.959	2.064	2.14	2.691	1.941	2.047	2.123	2.674	2.097	2.203	2.279	2.83	1.945	2.05	2.126	2.677	1.969	2.074
CPI-SS0917CBD53	HLA-C_KIR2DL3	simple:HLAC	simple:P43628	HLA-C	KIR2DL3	False	True	True	curated	False	0.122	2.181	2.192	2.576	2.76	2.234	2.418	2.323	2.507	2.418	2.602	2.116	2.127	2.511	2.695	2.213	2.224	2.608	2.792	2.064	2.248	2.223	2.15	2.458	2.642	2.048	2.059	2.443	2.627	2.189	2.2	2.584	2.768	2.067	2.078	2.462	2.646	2.152	2.164
CPI-SC07ECBFCA7	COL1A1_a10b1	complex	simple:P02452	complex:a10b1	complex	COL1A1	True	False	False	curated	True	0.122	0.394	0.524	1.098	0.307	0.59	0.353	0.72	1.293	0.33	0.296	0.306	0.588	0.352	0.718	1.292	0.329	0.295	0.399	0.529	1.102	0.402	0.532	1.105	0.528	0.81	0.573	0.94	1.513	0.551	0.517	0.272	0.554	0.318	0.684	1.258	0.295	0.261
CPI-SS064C772FE	CCR10_CCL28	simple:P46092	simple:Q9NRJ3	CCR10	CCL28	True	True	False	guidetopharmacology.org	False	0.125	0.765	0.954	0.539	0.705	0.473	0.419	0.921	0.409	0.744	0.932	0.517	0.683	0.451	0.397	0.899	0.821	0.656	1.258	1.447	1.032	0.638	0.808	1.198	0.966	0.912	1.414	0.902	0.767	0.956	0.541	0.707	0.475	0.421	0.923	0.411	1.416	1.251	1.854
CPI-SS0B01D306C	CCL5_CCR5	simple:P13501	simple:P51681	CCL5	CCR5	True	False	True	curated	False	0.125	2.231	2.113	2.096	2.062	2.122	2.07	2.172	2.51	2.8	2.451	1.355	1.634	1.924	1.575	1.57	1.452	1.435	1.4	1.46	1.409	1.511	1.849	2.139	1.79	2.355	2.237	2.22	2.185	2.245	2.194	2.296	2.634	2.924	2.575	1.483	1.651	1.533	1.516
CPI-SS0C1BD22BC	SPP1_PTGER4	simple:P10451	simple:P35408	SPP1	PTGER4	True	False	True	IMEx,MINT	False	0.125	1.177	0.84	1.2	1.201	0.85	1.028	1.286	1.439	1.342	1.346	1.432	0.892	1.111	2.558	2.222	2.074	1.957	2.582	2.583	2.232	2.044	1.899	1.927	2.41	2.668	2.821	2.724	2.727	2.813	2.089	2.273	1.912	2.493	1.97	0.82	0.844	0.845	0.93
CPI-SS00E68BB92	FGF7_FGFR3	simple:P21781	simple:P22607	FGF7	FGFR3	True	False	True	I2D	False	0.125	0.832	0.141	0.659	0.878	0.187	0.705	0.141	0.163	0.904	0.213	0.731	0.167	0.832	0.141	0.659	0.203	0.944	0.253	0.772	0.207	0.307	1.048	0.357	0.875	0.311	0.247	0.987	0.297	0.815	0.251	0.847	0.156	0.674	0.158	0.899	0.208	0.726	0.162
CPI-SS064281234	LAMP1_VSTM1	simple:P11279	simple:Q6UX27	LAMP1	VSTM1	True	True	True	IMEx,IntAct	False	0.125	0.751	1.197	0.936	0.9	1.122	0.861	1.037	0.776	0.722	0.851	1.297	1.036	0.787	1.233	0.972	0.822	1.268	1.007	1.024	0.763	1.115	0.854	0.99	1.436	1.175	0.832	1.278	1.017	0.745	1.191	0.93	0.756	1.202	0.941	0.848	1.294	1.033	0.787
CPI-SS0111AAD26	EPHB2_EFNB1	simple:P29323	simple:P98172	EPHB2	EFNB1	False	True	False	curated	False	0.125	0.279	0.263	0.598	0.407	0.263	0.58	0.423	0.272	0.337	0.52	0.738	0.506	0.491	0.825	0.634	0.491	0.807	0.65	0.5	0.564	0.747	0.965	0.193	0.178	0.512	0.321	0.178	0.494	0.337	0.187	0.251	0.434	0.653	0.598	0.583	0.917	0.726	0.583
CPI-CS0E4E75E3B	BMPR1A_BMPR2_BMP2	complex:BMPR1A_BMPR2	simple:P12643	BMP2	True	True	False	curated	False	0.125	0.204	1.12	0.286	0.199	0.596	0.189	0.359	0.33	0.335	1.275	0.441	0.354	0.751	0.345	1.102	0.268	0.578	1.04	0.206	0.516	0.282	0.252	0.257	1.197	0.363	0.276	0.673	0.267	1.059	0.225	0.535	0.275	0.246	0.251	1.191	0.357	0.27	0.667	0.26
CPI-SS083CBFACD	MDK_SORL1	simple:P21741	simple:Q92673	MDK	SORL1	True	False	True	InnateDB-All	False	0.125	0.863	0.635	1.174	0.608	0.817	0.874	0.667	1.404	0.948	0.807	0.876	0.603	0.911	0.981	0.674	1.176	1.715	1.149	0.758	0.751	0.866	0.706	0.854	0.627	1.165	0.599	0.881	0.458	0.653	1.192	0.626	0.954	0.498	0.531	0.726	1.265	0.699	0.797
CPI-SS02C29C238	FGFR3_NECTIN1	simple:P22607	simple:Q15223	FGFR3	NECTIN1	True	True	True	InnateDB-All	False	0.125	0.23	0.328	1.511	0.595	0.258	0.289	0.167	0.228	0.892	0.971	1.069	0.864	2.252	1.336	0.999	1.03	0.908	0.969	0.896	0.852	0.892	0.201	0.28	0.378	1.561	0.645	0.308	0.34	0.217	0.278	0.205	0.202	0.719	0.798	0.896	0.691	2.079	1.163
CPI-SS0EB5AEC83	SELL_CD34	simple:P14151	simple:P28906	SELL	CD34	False	False	False	curated	False	0.125	0.757	0.875	0.783	0.807	0.819	0.743	0.969	1.086	0.995	1.019	1.031	0.955	0.495	0.613	0.521	0.545	0.557	0.481	0.603	0.721	0.63	0.653	0.665	0.59	1.109	1.227	1.135	1.159	1.171	1.095	0.356	0.348	0.466	0.374	0.398	0.41	0.334	0.404
CPI-SS07F015051	CCR6_CCL20	simple:P51684	simple:P78556	CCR6	CCL20	True	True	False	curated	False	0.127	1.063	0.585	1.494	1.165	0.687	1.596	0.452	1.002	0.524	1.433	1.005	0.528	1.436	0.789	0.848	0.867	1.658	1.181	2.09	0.915	0.858	0.893	0.945	1.022	1.081	1.1	1.892	1.415	2.323	1.148	1.092	1.127	1.179	1.07	0.592	1.501	0.894	0.953
CPI-CS008C9D6E5	IL1	receptor	inhibitor_IL1B	complex:IL1	receptor	inhibitor	simple:P01584	IL1B	True	True	False	curated	False	0.127	0.878	0.807	0.597	0.701	1.058	0.965	0.751	1.452	0.836	0.707	1.381	1.172	1.275	1.632	1.539	0.628	1.329	0.713	0.584	1.258	1.049	1.152	1.509	1.416	0.986	0.914	0.705	0.809	1.166	1.073	0.958	1.659	1.043	0.914	1.588
CPI-SS0C7012011	CXCR1_YARS	simple:P25024	simple:P54577	CXCR1	YARS	False	True	False	guidetopharmacology.org	False	0.127	2.351	2.045	2.077	2.011	2.682	2.259	2.05	2.252	2.142	2.077	2.616	2.169	2.137	2.412	2.313	2.089	2.086	1.963	2.116	1.948	0.743	1.074	1.008	0.804	0.705	1.309	1.003	1.034	0.969	1.64	1.217	1.007	1.21	1.1	1.035	1.573	1.127	1.095
CPI-SS02371A6D6	VEGFA_EPHB2	simple:P15692	simple:P29323	VEGFA	EPHB2	True	False	True	I2D	False	0.129	0.363	0.591	0.278	0.683	0.277	0.378	0.605	0.292	0.697	0.291	0.291	0.518	0.61	0.306	0.533	0.625	0.322	0.549	0.641	0.833	1.06	0.748	1.152	0.746	0.483	0.71	0.397	0.802	0.396	0.324	0.551	0.643	1.019	1.246	0.933	1.338	0.932	1.113
CPI-SS08920B6FF	PODXL_SELL	simple:O00592	simple:P14151	PODXL	SELL	False	False	False	curated	False	0.129	0.739	0.951	0.477	0.586	1.091	0.33	0.387	1.275	0.697	1.285	1.497	1.023	0.72	1.132	1.637	0.637	0.767	0.876	0.705	0.933	0.642	1.821	0.676	1.244	1.357	1.569	1.095	0.791	1.203	1.709	0.709	0.838	0.948	0.776	1.004	0.714	1.892	0.747
CPI-CS063AE1C91	IL6	receptor_IL6	complex:IL6	receptor	simple:P05231	IL6	True	True	False	curated	False	0.129	0.913	0.269	0.573	0.264	1.099	0.443	0.431	0.455	0.759	0.45	1.268	0.612	0.6	0.624	0.928	0.619	0.897	0.557	0.914	0.27	0.574	0.886	0.546	0.845	0.506	0.856	0.516	1.524	0.868	0.856	0.88	1.184	0.875	1.435	0.779	0.767	0.791
CPI-SS083296041	CD40_CD40LG	simple:P25942	simple:P29965	CD40	CD40LG	True	True	False	curated	False	0.129	0.906	0.919	1.425	1.569	0.902	1.678	1.55	0.978	0.991	1.497	1.64	0.974	1.749	1.621	0.306	0.319	0.825	0.968	0.302	1.077	0.95	0.775	0.918	1.027	0.899	0.622	0.765	0.874	0.746	0.267	0.786	0.929	0.263	1.038	0.91	0.514	0.527	1.033
CPI-SS0A2949959	ICAM3_CD209	simple:P32942	simple:Q9NNX6	ICAM3	CD209	True	False	True	curated	False	0.132	0.735	0.82	1.138	1.386	0.737	0.822	1.14	1.388	0.924	1.124	1.209	1.527	1.775	0.931	1.016	1.334	1.582	1.021	1.106	1.423	1.671	0.854	0.799	1.117	1.365	1.076	1.161	1.478	1.726	0.879	0.963	1.281	1.529	0.725	0.81	1.128	1.376	0.817
CPI-SS03859E16F	TIGIT_NECTIN3	simple:Q495A1	simple:Q9NQS3	TIGIT	NECTIN3	False	False	False	curated	False	0.132	1.278	1.12	0.934	0.98	1.319	0.99	1.655	1.613	0.894	1.452	0.927	0.884	0.724	0.95	0.792	0.991	1.327	1.284	1.124	1.628	1.47	1.284	1.33	1.669	1.339	2.005	1.962	1.244	1.802	0.763	0.804	1.14	1.097	0.937	1.322	1.164	0.978	1.024
CPI-SC0F9DD28F3	JAM3_aMb2	complex	simple:Q9BX67	complex:aMb2	complex	JAM3	True	False	False	curated	True	0.132	0.35	0.639	0.502	0.448	1.015	0.478	0.677	1.03	1.069	1.28	1.181	1.124	1.039	1.094	1.569	1.432	1.378	1.946	1.408	1.607	0.463	0.364	0.752	0.615	0.562	1.129	0.592	0.791	0.323	0.534	0.435	0.378	0.348	0.823	0.686	0.633	1.2
CPI-SS05BA6D9C3	CCL4_CNR2	simple:P13236	simple:P34972	CCL4	CNR2	True	False	True	IMEx,IntAct	False	0.132	1.885	2.836	2.253	2.351	1.884	2.158	2.362	1.904	1.49	1.782	2.733	2.151	2.249	1.781	2.055	2.259	1.802	2.142	3.093	2.51	2.608	2.141	2.415	2.619	2.162	1.639	2.59	2.007	2.105	1.638	1.912	2.116	1.658	2.38	3.331	2.749	2.847	2.379
CPI-SS0A8627ED6	PVR_CD226	simple:P15151	simple:Q15762	PVR	CD226	True	True	True	curated	False	0.132	0.683	0.411	0.446	1.042	0.36	0.632	0.36	0.394	0.991	0.328	0.374	0.844	0.474	0.463	0.345	0.573	0.607	1.203	0.521	0.468	0.366	0.836	0.466	0.455	0.564	0.598	1.195	0.512	0.46	0.351	0.398	0.868	0.498	0.487	0.368	0.596	0.63	1.227
CPI-CS0A269FA16	NKG2D	II	receptor_ULBP2	complex:NKG2D	II	receptor	simple:Q9BZM5	ULBP2	True	True	False	curated	False	0.132	0.582	0.522	0.498	0.484	0.581	0.616	0.672	0.435	0.547	0.656	0.549	0.489	0.464	0.547	0.582	0.638	0.514	0.622	0.49	0.546	0.53	0.726	0.666	0.642	0.499	0.628	0.724	0.759	0.816	0.578	0.691	0.8	0.486	0.577	0.517
CPI-SS0EAB03260	CD1D_LILRB2	simple:P15813	simple:Q8N423	CD1D	LILRB2	False	False	True	curated	False	0.132	0.408	0.937	0.595	0.755	0.824	0.821	0.395	0.924	0.582	0.742	0.811	0.808	0.442	0.416	0.382	0.671	0.376	1.201	0.858	1.018	1.087	1.084	0.313	0.287	0.542	1.072	0.729	0.889	0.958	0.955	0.509	0.484	0.45	0.739	0.443	1.268	0.926	1.086
CPI-SS02CF96625	KIR2DL3_FAM3C	simple:P43628	simple:Q92520	KIR2DL3	FAM3C	True	True	False	IMEx,IntAct	False	0.132	1.378	0.87	0.93	0.988	1.04	0.714	0.788	0.651	0.938	1.389	0.882	0.941	0.999	1.052	0.725	0.799	0.949	0.921	0.664	1.773	0.765	1.266	0.857	0.991	1.325	0.948	1.383	1.436	1.109	0.793	1.183	1.046	0.978	1.333	0.662	0.951	0.789	1.105
CPI-SS00A8596B5	PVR_TNFSF9	simple:P15151	simple:P41273	PVR	TNFSF9	True	True	False	InnateDB-All	False	0.134	0.637	0.913	0.392	0.391	0.411	0.586	0.862	0.359	0.798	0.382	0.39	0.392	0.453	1.074	0.553	0.552	0.381	0.572	0.79	0.373	0.381	0.383	0.444	1.066	0.544	0.543	0.373	0.563	0.822	0.405	0.413	0.415	0.476	1.098	0.576	0.575	0.328	0.405
CPI-CS05AB368CE	CD94:NKG2C_HLA-E	complex:CD94:NKG2C	simple:P13747	HLA-E	False	True	False	curated	False	0.134	1.843	1.696	1.827	1.701	1.778	1.735	1.869	1.726	1.888	1.833	1.817	1.768	1.725	1.859	1.716	1.878	1.753	1.778	1.798	1.932	1.724	1.785	1.915	1.723	1.79	1.866	1.823	1.957	1.815	1.977	2.512	1.668	2.304	1.99	2.03	2.365	2.495	1.776	1.842
CPI-SS04456F441	TNFSF4_TNFRSF4	simple:P23510	simple:P43489	TNFSF4	TNFRSF4	False	False	True	curated	False	0.134	1.582	0.997	1.103	0.221	0.752	0.274	0.285	0.364	1.734	0.306	1.148	1.255	0.372	0.904	0.329	0.376	0.426	0.588	0.668	2.037	0.61	1.452	1.558	0.676	1.207	0.632	0.679	0.729	1.317	1.397	2.766	1.339	2.181	2.287	1.404	1.936	1.361	1.408
CPI-SS053613259	NRG2_ERBB3	simple:O14511	simple:P21860	NRG2	ERBB3	True	False	True	curated	False	0.134	0.278	0.322	0.274	0.316	0.882	0.867	0.926	0.859	0.827	0.833	0.842	0.856	0.819	0.879	0.853	0.538	0.522	0.582	0.514	0.483	0.489	0.497	0.512	0.475	0.534	0.508	0.473	0.458	0.518	0.45	0.418	0.424	0.433	0.448	0.41	0.47	0.444	0.426
CPI-SS0987A89AE	HLA-B_KIR3DL2	simple:HLAB	simple:P43630	HLA-B	KIR3DL2	False	True	True	curated	False	0.134	2.178	1.966	2.115	1.982	2.475	2.697	1.968	2.233	2.456	2.024	2.246	2.139	2.075	2.435	2.658	2.048	2.345	2.567	2.173	2.109	2.469	2.691	2.141	2.364	2.05	2.09	2.026	2.386	2.608	2.058	2.355	2.577	2.155	2.091	1.959	2.451	2.673	2.065
CPI-SS0C4FA643F	HLA-E_KLRC2	simple:P13747	simple:P26717	HLA-E	KLRC2	False	False	True	curated	False	0.134	1.843	1.833	1.753	1.932	2.512	1.798	1.668	1.724	2.304	1.99	2.03	1.696	1.785	2.365	1.827	1.817	1.915	2.495	1.781	1.776	1.842	1.974	1.723	2.303	1.701	1.79	2.37	1.656	1.778	1.768	1.866	2.446	1.732	1.735	1.725	1.823	2.403	1.689
CPI-CS0C16967C6	ACVR1_BMPR2_BMP6	complex:ACVR1_BMPR2	simple:P22004	BMP6	True	True	False	curated	False	0.134	0.5	0.153	0.179	0.172	0.527	0.18	0.206	0.326	0.681	0.334	0.36	0.189	0.544	0.197	0.223	0.76	1.115	0.768	0.794	0.509	0.188	0.184	0.538	0.191	0.218	0.258	0.612	0.265	0.292	0.516	0.195	0.487	0.167	0.361	0.716	0.369	0.395	0.489	0.168
CPI-SS0B0E09B1C	CTLA4_CD86	simple:P16410	simple:P42081	CTLA4	CD86	False	False	True	curated	False	0.136	0.24	0.276	0.72	0.825	0.753	0.503	0.757	0.617	0.658	0.762	0.69	0.441	0.695	0.555	0.286	0.731	0.835	0.763	0.513	0.768	0.627	1.644	1.681	2.125	1.645	2.229	2.158	1.908	2.162	2.022	0.317	0.354	0.798	0.318	0.902	0.831	0.581	0.835
CPI-CS06C6E2321	NKG2D	II	receptor_MICA	complex:NKG2D	II	receptor	simple:Q29983	MICA	False	True	False	curated	False	0.136	0.841	1.389	0.85	0.629	0.916	0.858	0.841	0.628	0.807	1.355	0.816	0.882	0.824	0.807	0.715	1.263	0.724	0.79	0.732	0.715	0.984	0.708	0.737	1.532	0.994	0.638	0.773	1.06	1.002	0.985	0.772	0.602	0.835	1.383	0.845
CPI-SS09199F78C	CCR1_CCL23	simple:P32246	simple:P55773	CCR1	CCL23	True	True	False	curated	False	0.136	0.614	1.916	0.675	0.425	0.864	0.39	0.378	2.166	0.462	0.545	0.925	0.587	1.889	0.648	0.6	1.902	0.661	0.609	1.911	0.67	0.8	1.24	0.765	0.753	2.542	0.837	0.921	1.3	0.728	1.167	0.693	0.681	2.469	0.764	0.848	1.228	0.918	1.357
CPI-SS0F8C664D9	CXCR3_CCL20	simple:P49682	simple:P78556	CXCR3	CCL20	True	True	False	guidetopharmacology.org	False	0.136	1.142	0.664	1.573	0.429	0.987	0.51	1.418	1.134	0.656	1.565	0.469	0.528	0.547	1.339	0.861	1.77	0.595	0.539	0.573	0.626	1.841	1.9	1.919	2.71	2.233	3.141	1.967	1.91	1.945	1.997	1.008	0.531	1.439	1.216	0.739	1.647	0.473	0.503
CPI-SS0F9B3B259	TNFSF13_TNFRSF1A	simple:O75888	simple:P19438	TNFSF13	TNFRSF1A	True	False	True	I2D,InnateDB-All	False	0.136	0.72	0.696	0.523	0.413	0.419	0.478	1.02	0.768	1.062	0.949	1.178	0.693	0.669	0.496	0.386	0.393	0.451	0.993	0.742	1.035	0.923	1.152	0.575	0.551	0.378	0.875	0.623	0.917	0.804	1.034	0.673	0.649	0.476	0.366	0.373	0.431	0.973	0.721
CPI-SS04A5D6B6F	DLL1_NOTCH1	simple:O00548	simple:P46531	DLL1	NOTCH1	False	False	True	curated	False	0.136	0.5	0.736	0.927	0.764	0.788	0.602	0.578	0.897	0.496	0.492	1.293	1.166	1.154	1.529	1.104	1.72	1.557	1.251	1.056	1.121	1.581	1.395	1.371	1.691	1.116	1.29	1.161	1.216	1.248	1.285	0.491	0.727	0.918	0.755	0.78	0.594	0.57	0.889
CPI-SS05B1FA8A8	LRP6_CKLF	simple:O75581	simple:Q9UBR5	LRP6	CKLF	True	True	False	IMEx,IntAct	False	0.136	0.665	0.875	0.702	0.601	0.934	0.863	0.503	0.628	0.517	0.57	0.458	0.618	0.496	0.539	0.806	1.016	0.844	0.743	1.076	1.004	0.644	0.77	0.658	0.711	0.599	0.76	0.637	1.228	1.008	1.495	1.705	1.532	1.431	0.99	0.966	1.764	1.693	1.333
CPI-SS0A021DB6E	CCL5_CCR1	simple:P13501	simple:P32246	CCL5	CCR1	True	False	True	curated	False	0.138	2.098	2.348	2.071	2.084	2.092	2.723	2.651	2.841	3.115	2.96	1.429	1.471	1.847	1.774	1.964	2.239	2.083	1.436	1.686	1.409	1.422	1.431	2.062	1.989	2.179	2.454	2.298	2.221	2.472	2.195	2.207	2.216	2.847	2.774	2.965	3.239	3.084	1.406
CPI-SC09938698A	CSPG4_a3b1	complex	simple:Q6UVK1	complex:a3b1	complex	CSPG4	False	False	False	curated	True	0.138	0.217	0.508	0.536	0.215	0.329	0.61	0.401	0.22	0.511	0.539	0.248	0.217	0.331	0.613	0.404	0.72	0.649	0.623	1.012	1.04	0.668	0.748	0.718	0.832	1.113	0.614	0.905	0.612	0.649	0.617	0.232	0.524	0.551	0.26	0.23	0.344	0.625
CPI-SS0822AEF5F	PTPRC_MRC1	simple:P08575	simple:P22897	PTPRC	MRC1	False	False	True	curated	False	0.138	1.766	2.039	2.443	2.977	1.72	1.563	1.967	2.502	1.799	2.334	1.69	2.224	1.882	2.416	1.626	2.031	2.565	1.611	1.883	2.288	2.822	1.564	1.776	1.518	1.753	1.863	2.397	1.497	1.769	2.174	2.708	1.658	1.93	2.335	2.869	1.612	1.535	1.808
CPI-SS06006F870	TTR_AGER	simple:P02766	simple:Q15109	TTR	AGER	True	False	True	I2D,IMEx,InnateDB-All,MINT	False	0.138	0.183	0.327	0.218	0.204	0.411	0.264	0.24	0.275	0.222	0.197	0.28	0.363	0.216	0.192	0.227	0.171	0.316	0.206	0.192	0.399	0.252	0.228	0.263	0.211	0.185	0.377	0.455	0.6	0.491	0.477	0.684	0.537	0.449	0.39	0.422	0.426	0.513	0.395
CPI-SC08E97F7CA	VCAM1_a4b7	complex	simple:P19320	complex:a4b7	complex	VCAM1	False	False	False	curated	True	0.138	0.825	0.845	1.444	0.984	1.387	0.78	0.823	1.249	0.651	1.025	0.95	0.995	0.859	0.634	0.648	0.93	0.47	0.873	0.736	0.512	0.437	0.481	0.938	0.479	0.881	0.744	0.52	0.489	0.492	0.512	1.111	0.651	1.054	0.916	0.693	0.618	0.662
CPI-SS0BAB460FF	ANGPT2_TEK	simple:O15123	simple:Q02763	ANGPT2	TEK	True	False	True	curated	False	0.141	0.643	1.244	0.395	0.74	1.34	0.387	0.44	1.273	1.618	2.218	1.265	1.318	0.435	1.035	0.48	1.081	0.635	1.235	0.662	1.006	1.607	0.653	0.706	0.691	1.036	1.636	0.683	0.736	0.566	0.911	1.511	0.558	0.61	0.423	0.768	1.368	0.415	0.468
CPI-CS0023FA839	CD94:NKG2E_HLA-E	complex:CD94:NKG2E	simple:P13747	HLA-E	False	True	False	curated	False	0.141	1.812	1.796	1.746	1.704	1.838	1.695	1.857	1.891	1.744	1.874	1.749	1.825	1.782	1.916	1.774	1.936	2.294	2.086	1.772	1.812	2.147	2.277	1.756	2.085	2.152	2.228	2.185	2.319	2.177	1.95	1.981	1.784	2.339	1.866	2.135	1.927	1.988	2.118	1.926
CPI-SS02B7540B0	SELP_SELPLG	simple:P16109	simple:Q14242	SELP	SELPLG	False	False	True	curated	False	0.141	0.673	0.701	1.373	0.492	0.98	0.455	0.61	0.419	0.666	0.694	1.366	0.485	0.973	0.448	0.603	0.411	0.829	0.706	0.693	0.735	1.256	1.001	1.284	1.956	0.828	0.939	0.708	0.969	1.075	1.563	0.896	1.038	0.81	1.193	1.001	0.849	0.461	0.889
CPI-CS06072FF4E	IL1	receptor_IL1A	complex:IL1	receptor	simple:P01583	IL1A	True	True	False	curated	False	0.141	0.155	0.221	0.224	0.198	0.158	0.206	0.142	0.207	0.211	0.185	0.145	0.193	0.171	0.16	0.236	0.24	0.214	0.174	0.221	0.176	0.179	0.153	0.161	0.335	0.324	0.4	0.404	0.378	0.338	0.385	0.598	0.587	0.663	0.667	0.641	0.601	0.649
CPI-SS0415CC75D	MERTK_GAS6	simple:Q12866	simple:Q14393	MERTK	GAS6	True	True	False	guidetopharmacology.org	False	0.141	0.432	1.296	0.445	0.342	0.468	0.251	0.177	0.16	0.41	1.273	0.422	0.32	0.445	0.228	0.376	0.667	1.531	0.679	0.397	0.577	0.703	0.486	0.412	0.395	0.601	0.891	1.755	0.904	0.621	0.801	0.927	0.71	0.636	0.619	0.443	1.307	0.456	0.354
CPI-SS0659DBE72	EFNA4_EPHA4	simple:P52798	simple:P54764	EFNA4	EPHA4	True	False	True	curated	False	0.141	0.512	0.469	0.462	0.466	0.53	0.459	0.812	0.447	0.772	0.73	0.723	0.727	0.79	0.72	1.073	0.574	0.531	0.525	0.529	0.592	0.522	0.875	0.364	0.382	0.665	0.738	0.696	0.689	0.693	0.756	0.686	1.039	0.899	0.856	0.85	0.854	0.917	0.847
CPI-SS0FF6CFDCA	ADORA3_ENTPD1	simple:P0DMS8	simple:P49961	ADORA3	ENTPD1	False	True	False	curated	False	0.141	0.823	0.455	0.347	0.457	0.415	0.416	0.509	0.488	0.623	0.442	0.402	0.425	1.09	0.722	0.614	0.428	0.724	0.682	0.683	0.776	0.755	0.89	0.452	0.247	0.895	0.528	0.419	0.529	0.488	0.488	0.581	0.56	0.695	0.257	0.512	0.473	0.495	1.16
CPI-CS075442484	BMR1A_ACR2A_BMP2	complex:BMR1A_ACR2A	simple:P12643	BMP2	True	True	False	curated	False	0.143	0.142	1.058	0.224	0.137	0.534	1.012	0.178	0.488	1.027	0.193	0.503	0.222	0.193	0.198	1.138	0.304	0.217	0.614	0.208	1.028	0.194	0.504	0.142	1.058	0.224	0.137	0.534	0.127	0.328	0.299	0.303	1.243	0.409	0.323	0.719	0.313	0.134	1.049	0.215
CPI-SS06CCF5A54	ANXA1_FPR3	simple:P04083	simple:P25089	ANXA1	FPR3	True	False	True	guidetopharmacology.org	False	0.143	1.011	1.405	1.531	1.065	1.191	1.119	1.246	1.312	1.438	1.073	2.045	2.317	2.711	2.837	2.06	1.08	1.352	1.745	1.871	1.094	1.076	1.203	1.133	1.405	1.799	1.925	1.148	1.479	1.751	2.144	2.271	1.493	0.98	1.252	1.646	1.772	0.995	1.079
CPI-SS0B01CF3AB	CSF1R_CSF1	simple:P07333	simple:P09603	CSF1R	CSF1	True	True	False	curated	False	0.143	0.327	2.427	0.55	0.344	2.443	0.567	2.4	0.523	0.851	0.708	0.668	0.822	2.95	0.65	0.669	1.073	0.733	0.817	0.764	0.645	1.021	0.878	0.839	0.993	3.12	0.82	0.84	1.244	0.903	0.988	0.935	0.816	0.436	0.408	2.535	0.659	0.318	0.402
CPI-SS0B84DAE3D	PVR_CD96	simple:P15151	simple:P40200	PVR	CD96	True	True	True	curated	False	0.143	0.912	1.007	0.817	1.12	1.138	1.12	0.911	1.162	0.86	0.956	1.069	1.087	1.068	0.86	1.111	1.073	1.168	0.978	1.281	1.299	1.281	1.072	0.867	1.323	1.064	1.16	0.969	1.273	1.291	1.272	1.064	0.858	1.315	1.096	1.192	1.001	1.305	1.323
CPI-CS0BE59B43E	BMR1A_AVR2B_BMP2	complex:BMR1A_AVR2B	simple:P12643	BMP2	True	True	False	curated	False	0.145	0.388	0.359	0.364	1.304	0.47	0.383	0.78	0.374	1.006	0.172	0.482	0.487	0.458	0.463	1.403	0.569	0.482	0.879	0.472	0.691	0.662	0.667	1.607	0.773	0.686	1.083	0.677	0.194	0.165	0.17	1.11	0.276	0.189	0.586	0.179	0.222	0.193	0.198	1.137
CPI-SS0E5AF12B6	NOTCH1_NOV	simple:P46531	simple:P48745	NOTCH1	NOV	True	True	False	I2D,InnateDB-All	False	0.145	1.576	1.43	0.479	1.449	1.303	1.438	1.291	0.586	1.812	1.666	0.716	0.585	1.388	1.241	0.777	2.003	1.857	0.906	0.776	0.614	1.84	1.694	0.744	0.613	1.534	1.388	1.339	1.193	1.404	1.258	0.638	1.865	1.718	0.768	0.637	0.452	1.679	1.532
CPI-SS0BDD10277	HLA-F_KIR3DL2	simple:P30511	simple:P43630	HLA-F	KIR3DL2	False	False	True	curated	False	0.145	1.335	1.123	1.272	1.14	1.632	1.854	1.125	1.317	1.284	1.506	1.347	1.569	1.341	1.129	1.277	1.145	1.637	1.86	1.271	1.208	1.568	1.79	1.263	1.199	1.287	1.224	1.584	1.806	1.372	1.159	1.308	1.176	1.668	1.891	1.161	1.192	1.488	1.711
CPI-SS09648FAA9	TNFRSF13C_TNFSF13B	simple:Q96RJ3	simple:Q9Y275	TNFRSF13C	TNFSF13B	True	True	False	guidetopharmacology.org	False	0.145	0.807	0.966	0.643	1.16	0.821	0.872	1.975	1.489	1.283	1.353	1.462	1.277	1.493	1.333	2.134	1.811	2.329	1.989	2.04	0.813	0.972	0.649	1.166	0.827	0.878	0.804	0.964	0.641	1.158	0.819	0.87	1.578	1.092	0.886	0.956	1.065	0.88	1.096
CPI-SS0CDAC688B	CXCL2_DPP4	simple:P19875	simple:P27487	CXCL2	DPP4	True	False	True	curated	False	0.147	0.513	0.793	0.714	0.947	0.628	0.908	0.829	1.062	0.626	0.907	0.828	1.06	0.531	0.811	0.733	0.965	0.572	0.852	0.773	1.006	0.82	0.875	1.207	0.857	0.868	1.487	0.918	1.408	1.641	0.846	0.901	1.233	0.882	0.894	1.513	0.943	1.434	1.666
CPI-SC007890A1C	CDH1_aEb7	complex	simple:P12830	complex:aEb7	complex	CDH1	False	False	False	curated	True	0.147	0.291	0.311	0.91	0.45	0.853	0.715	0.491	0.416	0.461	0.325	0.578	0.598	1.197	0.737	1.14	0.533	0.576	1.002	0.404	0.778	0.703	0.748	0.612	0.387	0.401	1.189	1.21	1.808	1.348	1.751	1.144	1.187	1.614	1.016	1.39	1.315	1.359
CPI-CS0DEBE7B69	IL1	receptor_IL1RN	complex:IL1	receptor	simple:P18510	IL1RN	True	True	False	curated	False	0.147	0.816	0.77	1.341	0.431	0.731	0.886	0.802	0.756	1.327	0.417	0.718	0.872	0.831	0.785	1.356	0.446	0.747	0.901	0.771	0.725	1.296	0.386	0.687	0.841	0.35	0.995	0.949	1.52	0.61	0.911	1.065	0.613	1.258	1.212	1.783	0.873	1.174
CPI-SS05D406038	PTGIR_GHRL	simple:P43119	simple:Q9UBU3	PTGIR	GHRL	True	True	False	InnateDB-All	False	0.147	0.145	0.528	0.9	0.282	0.163	0.137	0.521	0.893	0.275	0.156	0.579	0.581	0.635	1.019	1.391	0.773	0.569	0.579	0.654	0.583	0.571	0.441	0.443	0.498	0.882	1.254	0.635	0.432	0.442	0.516	0.445	0.434	0.267	0.269	0.324	0.707	1.08	0.461
CPI-SS01ECFDA18	TNFRSF10C_TNFSF10	simple:O14798	simple:P50591	TNFRSF10C	TNFSF10	True	True	False	curated	False	0.147	1.534	1.52	1.666	1.517	1.896	1.774	1.532	1.506	2.671	2.043	1.731	1.55	1.691	1.597	1.572	1.752	1.693	1.697	2.369	1.564	0.529	0.515	0.661	0.512	0.891	0.769	0.526	0.501	1.666	1.038	0.726	0.545	0.686	0.592	0.567	0.747	0.688	0.692
CPI-SS0D4BF6CA3	CD27_CD70	simple:P26842	simple:P32970	CD27	CD70	True	True	False	curated	False	0.147	0.725	1.487	0.744	1.88	0.632	1.008	0.67	0.883	0.986	0.45	1.212	0.469	1.605	0.733	0.608	0.711	1.156	1.549	0.677	0.553	0.655	1.373	2.136	1.392	2.528	1.281	1.657	1.319	1.532	1.634	1.054	1.817	1.073	2.209	0.962	1.338	1	1.213
CPI-SS0BC7CD11B	LGALS9_MET	simple:O00182	simple:P08581	LGALS9	MET	True	False	True	InnateDB-All	False	0.152	0.378	0.497	0.743	0.454	0.699	0.712	0.831	0.587	1.077	0.424	0.67	0.999	1.118	0.874	1.364	0.709	0.828	0.584	1.074	0.504	0.623	0.869	0.716	0.835	0.591	1.081	0.493	0.739	0.531	0.649	0.406	0.895	0.513	0.631	0.387	0.877	0.418	0.537
CPI-SS03339363E	HLA-E_KLRK1	simple:P13747	simple:P26718	HLA-E	KLRK1	False	False	True	curated	False	0.152	1.936	1.903	1.811	2.08	1.931	2.15	1.763	1.728	1.695	1.872	1.723	1.942	1.789	1.756	1.933	1.784	2.003	1.92	1.886	1.794	2.064	1.915	2.134	1.746	1.872	1.942	1.794	1.761	1.938	1.789	2.008	1.871	1.837	1.745	2.014	1.865	2.084	1.697
CPI-SC0EEF3A379	LAMC1_a6b1	complex	simple:P11047	complex:a6b1	complex	LAMC1	True	False	False	curated	True	0.152	0.816	0.766	1.034	0.952	0.925	0.856	1.301	0.839	1.256	1.014	1.082	0.754	0.378	0.328	0.596	0.514	0.487	0.418	0.863	0.401	0.818	0.576	0.644	1.078	1.028	1.296	1.214	1.187	1.119	1.563	1.102	1.518	1.277	1.344	1.016	0.365	0.632
CPI-SS0073098F3	IL13_TMEM219	simple:P35225	simple:Q86XT9	IL13	TMEM219	True	False	True	IMEx,IntAct	False	0.152	0.979	0.654	0.717	0.775	0.656	0.677	0.894	0.869	0.898	1.026	0.823	0.616	1.042	0.716	0.779	0.838	0.625	0.718	0.576	0.614	0.74	0.587	0.956	0.931	0.96	1.089	0.886	2.348	2.406	2.019	2.832	2.506	2.569	2.628	2.306	2.415	2.509	2.366
CPI-SC0C8B4C056	CD40LG_a5b1	complex	simple:P29965	complex:a5b1	complex	CD40LG	True	False	False	curated	True	0.154	0.666	0.42	0.695	0.982	0.679	0.433	0.708	0.995	0.709	0.649	0.692	0.674	0.629	0.741	0.642	0.806	0.621	1.185	0.939	1.214	0.703	1.502	0.852	0.792	0.835	0.817	0.772	0.884	0.785	0.949	0.764	1.328	1.082	1.358	0.846	1.645	0.662
CPI-SS02AB0C3E0	SPP1_CD44	simple:P10451	simple:P16070	SPP1	CD44	True	False	True	I2D,IMEx,InnateDB-All,IntAct	False	0.154	1.505	1.362	1.34	1.159	1.263	1.74	1.812	1.906	1.17	1.59	1.711	1.564	1.731	1.637	1.726	1.665	1.947	2.887	2.744	2.722	2.541	2.498	2.645	3.122	2.355	2.4	3.194	3.288	2.552	2.972	3.093	2.415	2.945	3.112	3.018	3.107	3.047	3.329
CPI-SS079728E8B	ADORA2B_ENTPD1	simple:P29275	simple:P49961	ADORA2B	ENTPD1	False	True	False	curated	False	0.154	0.384	0.345	0.367	1.032	0.664	0.556	0.37	0.666	0.624	0.625	0.718	0.697	0.832	0.394	0.534	0.495	0.518	1.183	0.815	0.706	0.521	0.817	0.775	0.776	0.869	0.847	0.982	0.544	0.299	0.283	0.948	0.58	0.471	0.582	0.54	0.541	0.634	0.612
CPI-SS0A5DF05C0	TIGIT_NECTIN2	simple:Q495A1	simple:Q92692	TIGIT	NECTIN2	False	False	True	curated	False	0.156	0.895	1.103	0.895	0.869	0.953	1.246	1.301	1.146	1.512	1.161	0.517	0.573	0.783	0.567	0.775	0.566	0.541	0.625	0.917	0.973	0.818	1.184	0.833	1.245	1.453	1.245	1.219	1.303	1.595	1.651	1.496	1.862	1.511	0.588	0.73	0.786	0.631	0.997
CPI-CS0A9D23000	NKG2D	II	receptor_MICB	complex:NKG2D	II	receptor	simple:Q29980	MICB	False	True	False	curated	False	0.156	0.695	0.566	1.778	0.78	0.701	0.71	0.549	0.792	0.662	1.744	0.746	0.668	0.677	0.758	1.652	0.654	0.576	0.585	0.666	0.839	0.528	0.71	0.539	1.921	0.924	0.637	0.614	0.845	0.854	0.693	0.936	0.655	0.621	0.628	0.533
CPI-SS0391D4602	NTRK1_NAMPT	simple:P04629	simple:P43490	NTRK1	NAMPT	True	True	False	InnateDB-All	False	0.156	2.467	1.358	1.54	1.94	1.592	2.096	1.823	2.06	1.37	1.389	2.825	1.716	1.377	1.898	1.239	1.349	1.597	1.376	1.32	1.407	1.366	1.351	2.298	1.95	2.453	2.181	2.418	2.173	2.191	1.962	3.628	2.518	2.18	2.7	2.042	2.152	2.4	2.179
CPI-SS068C129D6	CSF1_SIRPA	simple:P09603	simple:P78324	CSF1	SIRPA	True	False	True	I2D	False	0.156	0.317	0.858	1.034	0.802	0.585	0.844	0.715	0.891	0.659	0.442	0.701	0.675	0.851	0.62	0.402	0.661	0.83	1.006	0.774	0.557	0.815	2.365	2.417	2.379	2.381	2.957	3.133	2.902	2.684	2.943	0.657	0.833	0.602	0.384	0.643	0.677	0.853	0.621
CPI-SS00FB3CB09	FFAR2_CCL4L2	simple:O15552	simple:Q8NHW4	FFAR2	CCL4L2	True	True	False	IMEx,IntAct	False	0.159	0.763	0.869	1.021	0.825	1.015	0.725	0.936	1.954	1.496	1.338	1.324	1.375	2.061	1.359	1.529	2.213	2.017	1.317	2.207	1.916	1.483	1.684	1.384	2.127	1.43	1.007	1.114	1.266	1.07	1.26	0.969	1.181	0.785	0.892	1.044	0.848	1.038	0.748
CPI-SC096929DB0	FN1_aVb1	complex	simple:P02751	complex:aVb1	complex	FN1	True	False	False	curated	True	0.159	0.267	0.659	0.472	0.814	0.236	0.897	0.46	0.211	0.271	0.663	0.249	0.476	0.818	0.24	0.901	0.463	0.352	0.45	0.414	0.413	0.51	0.373	0.902	0.488	0.358	0.364	0.368	0.383	0.382	0.715	1.057	0.479	1.14	0.702	1.29	1.388	1.351
CPI-SS0D1D95883	CCL4_CCR5	simple:P13236	simple:P51681	CCL4	CCR5	True	False	True	curated	False	0.159	2.043	1.925	1.908	1.873	1.933	1.882	1.984	2.322	2.612	2.263	1.94	1.823	1.805	1.771	1.831	1.78	1.881	2.22	2.509	2.161	2.3	2.183	2.165	2.131	2.191	2.14	2.241	2.579	2.869	2.52	1.797	1.679	1.662	1.627	1.687	1.636	1.738	2.076
CPI-SC07BE7830D	SPP1_a4b1	complex	simple:P10451	complex:a4b1	complex	SPP1	True	False	False	curated	True	0.159	0.878	0.82	1.291	1.278	1.689	0.762	1.381	1.077	0.788	1.325	1.231	0.724	1.334	1.356	1.186	1.137	1.506	2.259	2.041	2.202	1.896	2.673	2.66	3.071	2.04	2.144	2.11	2.763	2.459	2.169	2.707	2.612	2.105	2.716	2.737	2.568	2.518
CPI-SS054D158CC	NTRK1_GRN	simple:P04629	simple:P28799	NTRK1	GRN	True	True	False	InnateDB-All	False	0.159	0.655	0.545	1.138	0.96	0.677	1.119	1.261	1.119	1.255	1.051	0.502	0.605	1.013	0.903	1.495	0.79	0.668	1.317	1.035	0.622	0.712	0.531	0.544	0.621	0.531	1.476	1.618	1.476	1.613	1.409	1.305	1.408	1.815	1.706	2.298	1.593	1.471	2.12
CPI-SS02FBD007E	NECTIN2_NECTIN3	simple:Q92692	simple:Q9NQS3	NECTIN2	NECTIN3	False	True	False	curated	False	0.159	0.5	0.541	0.877	0.834	0.674	0.708	0.55	0.749	1.085	1.043	0.882	0.5	0.541	0.877	0.834	0.674	0.474	0.516	0.851	0.809	0.648	0.558	0.599	0.935	0.892	0.732	0.85	0.693	0.507	0.552	0.892	0.562	1.227	1.185	0.467	1.024	0.906	0.748
CPI-SS077D7365D	CD28_CD86	simple:P10747	simple:P42081	CD28	CD86	False	False	True	curated	False	0.159	0.4	0.437	0.881	0.985	0.914	0.664	0.918	0.778	0.745	0.849	0.777	0.528	0.782	0.642	0.723	0.828	0.756	0.506	0.761	0.62	1.076	1.113	1.557	1.077	1.661	1.589	1.34	1.594	1.454	0.863	0.967	0.895	0.646	0.9	0.76	0.61	0.715	0.643
CPI-SS0B1AB068C	NTRK1_GPI	simple:P04629	simple:P06744	NTRK1	GPI	True	True	False	InnateDB-All	False	0.159	0.592	0.553	0.702	0.551	0.702	0.576	0.545	0.888	0.892	0.609	0.592	0.732	0.949	0.555	0.764	0.911	1.059	0.909	0.614	1.06	0.767	0.933	0.796	0.631	0.903	1.246	1.25	0.966	0.95	1.089	1.752	1.357	1.567	1.713	1.862	1.712	1.416	1.281
CPI-SS0D0252D87	AXL_IL15RA	simple:P30530	simple:Q13261	AXL	IL15RA	True	True	True	I2D	False	0.161	0.312	0.367	0.677	0.346	0.301	0.523	0.33	0.961	0.39	0.366	0.445	0.755	0.424	0.319	0.379	0.601	0.408	1.039	0.432	0.408	0.487	0.797	0.466	0.361	0.346	0.421	0.311	0.643	0.335	0.45	1.081	0.661	0.627	0.651	0.621	0.82	0.796	0.874
CPI-SC067EE23E1	COL9A2_a10b1	complex	simple:Q14055	complex:a10b1	complex	COL9A2	True	False	False	curated	True	0.161	0.28	0.562	0.325	0.692	1.266	0.303	0.269	0.324	0.607	0.37	0.737	1.31	0.347	0.313	0.169	0.451	0.215	0.581	1.155	0.192	0.158	0.382	0.145	0.512	1.085	0.314	0.596	0.359	0.726	1.3	0.337	0.303	0.393	0.157	0.523	1.097	0.134
CPI-SS0B9B3870A	VEGFA_FLT1	simple:P15692	simple:P17948	VEGFA	FLT1	True	False	True	curated	False	0.161	0.292	0.463	0.325	0.283	0.649	0.306	0.477	0.339	0.297	0.663	0.391	0.577	0.405	0.591	0.421	0.283	0.607	0.639	0.762	0.933	0.794	0.753	0.654	1.119	0.288	0.411	0.582	0.444	0.402	0.303	0.768	0.253	0.424	0.285	0.244	0.61	0.824	0.948
CPI-CS077F1340A	FLT1	complex_VEGFB	complex:FLT1	complex	simple:P49765	VEGFB	True	True	False	curated	False	0.161	0.624	0.806	0.358	1.806	0.356	0.381	0.613	0.395	0.331	0.883	0.709	0.617	0.799	0.352	1.799	0.349	0.374	0.607	0.388	0.324	0.876	0.702	0.615	0.797	0.35	1.797	0.347	0.372	0.605	0.386	0.322	0.874	0.7	1.208	1.14	1.68	1.862
CPI-SC0FDB4B6D9	GDF9_TGFR_BMPR2	simple:O60383	complex:TGFR_BMPR2	GDF9	True	False	True	curated	False	0.161	0.985	0.666	0.353	0.612	0.395	0.635	0.359	0.335	0.396	0.476	0.497	0.735	0.511	0.835	0.911	0.592	0.539	0.561	0.402	0.424	0.661	0.437	0.761	0.93	0.611	0.558	0.58	0.421	0.443	0.68	0.456	0.78	0.909	0.59	0.537	0.559	0.4	0.421	0.659
CPI-SS05834E385	CD40_INSL3	simple:P25942	simple:P51460	CD40	INSL3	True	True	False	I2D	False	0.161	1.289	1.113	0.909	1.455	1.385	2.084	0.973	0.906	1.361	1.185	0.981	1.527	1.457	2.155	1.045	0.978	0.689	0.513	0.309	0.855	0.785	1.484	0.373	0.306	0.638	0.463	0.259	0.804	0.735	1.433	0.322	0.256	0.485	0.31	0.652	0.582	1.28	0.649
CPI-SC0B4D7E0FF	FN1_a4b7	complex	simple:P02751	complex:a4b7	complex	FN1	True	False	False	curated	True	0.161	0.297	0.318	0.916	0.456	0.859	0.722	0.498	0.423	0.467	0.332	0.301	0.322	0.92	0.46	0.863	0.726	0.502	0.427	0.471	0.335	0.54	0.561	1.159	0.699	1.102	0.495	0.538	0.965	0.367	0.741	0.666	0.71	0.574	0.349	0.363	1.478	1.498
CPI-SS0EDAE16B6	EPOR_KITLG	simple:P19235	simple:P21583	EPOR	KITLG	True	True	False	I2D	False	0.161	0.496	0.681	0.345	0.53	0.474	0.66	0.413	0.42	0.426	0.646	0.831	0.419	0.475	0.66	0.491	0.548	0.472	0.479	0.486	0.706	0.891	0.478	0.975	0.982	0.988	1.208	1.393	0.981	0.373	0.38	0.386	0.606	0.791	0.379	0.435	0.442	0.448	0.668
CPI-SS0C090A257	CCL3_CCR5	simple:P10147	simple:P51681	CCL3	CCR5	True	False	True	curated	False	0.163	0.95	1.24	0.892	0.995	0.834	0.87	1.28	1.163	1.145	1.111	1.171	1.12	1.221	1.56	1.85	1.501	0.855	0.884	0.872	0.869	1.697	1.579	1.562	1.527	1.587	1.536	1.638	1.976	2.266	1.917	0.807	1.097	0.748	0.848	1.426	1.308	1.291	1.256
CPI-SC08226CD3B	COL9A2_a2b1	complex	simple:Q14055	complex:a2b1	complex	COL9A2	True	False	False	curated	True	0.163	0.383	0.297	0.332	0.898	0.431	0.419	0.338	0.428	0.341	0.377	0.942	0.475	0.463	0.382	0.272	0.186	0.222	0.787	0.32	0.308	0.227	0.203	0.717	0.25	0.238	0.157	0.417	0.331	0.366	0.932	0.465	0.453	0.372	0.214	0.729	0.262	0.25
CPI-SC04B0064C4	COL18A1_a2b1	complex	simple:P39060	complex:a2b1	complex	COL18A1	True	False	False	curated	True	0.163	0.536	0.45	0.486	1.051	0.584	0.572	0.491	0.836	0.369	0.459	0.974	0.507	0.495	0.414	0.515	0.428	0.464	1.029	0.562	0.55	0.469	0.781	0.577	0.49	0.526	1.091	0.624	0.612	0.531	0.693	0.607	0.642	1.207	0.741	0.728	0.647	0.974
CPI-SS0423580E5	DLL1_NOTCH2	simple:O00548	simple:Q04721	DLL1	NOTCH2	False	False	True	curated	False	0.163	0.357	0.701	0.86	0.509	0.688	0.513	0.501	0.336	0.346	0.913	0.654	0.667	0.501	0.759	1.061	1.15	1.494	1.039	1.653	1.302	1.066	1.481	1.029	1.306	1.294	1.129	1.089	1.129	1.127	1.139	1.706	1.447	1.46	1.294	1.552	0.349	0.692	0.852
CPI-SS00D153A8A	NOTCH4_DLL4	simple:Q99466	simple:Q9NR61	NOTCH4	DLL4	False	True	False	curated	False	0.163	0.149	0.281	0.91	0.988	0.749	0.577	0.71	0.545	1.338	1.417	1.177	0.508	0.641	0.476	1.269	1.347	1.108	0.192	0.325	0.16	0.953	1.032	0.792	1.648	1.781	1.616	2.409	2.488	2.248	0.512	0.644	0.479	1.272	1.351	1.111	0.314	0.447	0.282
CPI-SS095DCA7F7	LILRA4_BST2	simple:P59901	simple:Q10589	LILRA4	BST2	False	True	False	curated	False	0.166	0.73	1.043	1.122	0.865	1.11	0.828	1.018	1.25	1.064	0.734	0.797	0.92	0.772	1.003	1.054	0.944	1.324	0.892	1.696	1.37	1.665	1.291	2.009	2.087	1.83	2.076	1.793	1.984	2.216	2.029	1.7	1.762	1.886	1.737	1.969	2.019	1.91	2.29
CPI-CS05426BFFA	IL1	receptor_IL1B	complex:IL1	receptor	simple:P01584	IL1B	True	True	False	curated	False	0.166	0.909	0.838	0.628	0.732	1.089	0.996	0.895	0.824	0.615	0.718	1.076	0.983	0.924	0.853	0.644	0.747	1.104	1.011	0.864	0.793	0.584	0.687	1.044	0.951	0.387	1.088	0.472	1.017	0.808	0.911	1.268	1.175	0.65	1.351	0.735	0.606	1.28
CPI-SS09F973C1A	EPHA2_EFNA4	simple:P29317	simple:P52798	EPHA2	EFNA4	True	True	False	curated	False	0.166	0.469	0.73	0.532	0.322	0.696	0.857	0.344	0.292	0.461	0.848	0.482	1.108	0.91	0.7	1.074	1.235	0.61	0.481	0.527	0.568	0.722	0.671	0.839	0.611	0.477	0.621	0.536	1.353	0.988	1.614	1.416	1.206	1.58	1.741	1.116	0.987	1.033	1.074
CPI-CS0C9EE65C2	FcRn	complex_ALB	complex:FcRn	complex	simple:P02768	ALB	True	True	False	curated	False	0.168	0.767	1.389	0.77	1.392	0.663	0.638	1.074	1.696	0.838	0.719	0.813	1.249	1.871	1.401	1.282	1.376	1.812	2.434	0.636	1.258	0.811	1.433	1.155	1.036	1.131	1.567	2.188	0.767	0.648	0.742	1.178	1.8	0.817	0.698	0.793	1.229	1.851
CPI-SS03722104E	HGF_CD44	simple:P14210	simple:P16070	HGF	CD44	True	False	True	IMEx,InnateDB-All,IntAct	False	0.168	1.271	1.128	1.506	1.578	1.672	1.356	1.477	1.329	1.496	1.402	1.491	1.431	1.713	1.842	1.699	1.677	1.496	1.453	1.6	2.077	1.31	1.355	2.149	2.243	1.507	1.927	2.048	1.37	1.9	2.067	1.973	2.062	2.002	2.284	1.438	1.295	1.274	1.197
CPI-SS0D2539AEB	FPR3_HEBP1	simple:P25089	simple:Q9NRV9	FPR3	HEBP1	False	True	False	guidetopharmacology.org	False	0.168	0.514	0.301	0.288	0.317	0.294	0.574	0.7	0.49	0.824	0.501	0.467	0.786	0.573	0.403	0.56	0.436	0.589	0.566	0.379	0.353	0.42	0.373	0.393	0.846	0.973	0.762	1.096	0.773	0.861	1.179	0.966	0.797	0.954	0.829	0.982	0.959	0.773	0.746
CPI-SS05D1A6BEF	NTRK1_AIMP1	simple:P04629	simple:Q12904	NTRK1	AIMP1	True	True	False	InnateDB-All	False	0.168	0.593	0.961	0.829	0.864	0.582	0.665	0.55	0.627	0.523	0.516	0.759	0.695	0.709	0.559	0.832	0.519	0.951	0.838	1.319	1.186	1.221	0.869	0.939	1.022	0.908	0.807	0.985	0.881	0.874	1.117	1.053	0.854	1.067	0.916	1.635	1.322	1.753	1.641
CPI-SC091D10DFA	IFNB1_Type	I	IFNR	simple:P01574	complex:Type	I	IFNR	IFNB1	True	False	True	curated	False	0.17	0.509	0.62	0.881	0.559	0.753	0.687	0.545	0.862	0.604	0.587	0.697	0.958	0.564	0.557	0.636	0.445	0.486	0.83	0.764	0.622	0.939	0.681	0.596	0.555	0.629	0.775	0.885	0.643	1.147	0.752	0.626	0.746	0.825	0.611	0.634
CPI-SS05E6D620E	EPHA1_EFNA4	simple:P21709	simple:P52798	EPHA1	EFNA4	True	True	False	curated	False	0.17	0.75	0.384	1.011	0.813	0.602	0.977	1.138	0.512	0.383	0.429	0.47	0.624	0.573	0.741	0.513	0.379	0.523	0.438	0.69	0.95	0.752	0.542	0.916	1.077	0.452	0.41	0.564	0.512	0.681	0.453	0.463	0.378	0.571	0.831	0.633	0.423	0.797	0.958
CPI-SS090FC28E1	EPHB6_EFNB2	simple:O15197	simple:P52799	EPHB6	EFNB2	True	True	True	curated	False	0.17	0.309	1.263	1.082	1.093	1.213	2.167	1.08	1.06	1.101	1.057	0.365	1.319	0.342	1.296	0.587	0.598	0.718	1.673	0.585	0.565	0.607	0.563	1.205	1.2	0.357	0.367	0.487	1.442	0.354	0.334	0.376	0.332	0.32	0.331	0.451	1.405	0.318	0.298
CPI-SS038E93B77	FGFR1_FGF9	simple:P11362	simple:P31371	FGFR1	FGF9	True	True	False	I2D,InnateDB-All	False	0.17	0.531	0.576	0.566	0.611	0.376	0.482	0.528	0.413	0.441	0.656	0.702	0.428	0.467	0.619	0.664	0.429	0.504	0.549	0.597	0.643	0.408	0.529	0.574	0.669	0.547	0.698	0.558	0.913	0.958	0.684	0.723	0.705	0.582	0.733	0.593	0.948	0.994	0.72
CPI-SS0E6E8A727	NTRK1_COPA	simple:P04629	simple:P53621	NTRK1	COPA	True	True	False	InnateDB-All	False	0.17	0.644	0.82	0.748	0.729	0.993	0.825	0.66	0.676	0.651	0.849	0.655	0.876	0.754	1.002	0.88	1.178	1.106	1.029	1.087	1.351	0.815	0.754	1.183	0.999	1.017	0.958	1.033	1.009	1.206	1.012	1.233	0.971	1.111	1.805	1.683	1.98	1.313	1.908
CPI-SC02BFEEC8A	THBS1_a3b1	complex	simple:P07996	complex:a3b1	complex	THBS1	False	False	False	curated	True	0.17	0.563	0.591	0.665	0.612	0.643	0.607	0.681	0.553	0.581	0.655	0.555	0.629	0.548	0.621	0.535	0.562	0.636	1.41	1.339	1.313	1.701	1.729	1.358	1.438	1.408	1.522	1.803	1.304	1.594	1.301	1.339	1.307	0.593	0.885	0.912	0.621	0.591
CPI-SS0F94547B2	NCR3_NCR3LG1	simple:O14931	simple:Q68D85	NCR3	NCR3LG1	False	True	False	curated	False	0.172	0.482	0.446	0.608	0.482	0.446	0.608	0.508	0.59	0.538	0.793	0.543	0.544	0.757	0.919	0.521	0.511	0.619	0.431	0.556	0.954	1.036	0.984	1.239	0.989	0.991	1.203	1.365	0.967	0.958	1.065	0.375	0.458	0.661	0.41	0.412	0.624	0.786	0.388
CPI-SS0412C803A	TNFRSF8_TNFSF8	simple:P28908	simple:P32971	TNFRSF8	TNFSF8	False	True	False	curated	False	0.175	0.431	0.393	0.8	0.639	0.503	0.814	0.672	0.627	0.614	0.603	0.937	0.602	0.899	0.69	0.843	1.305	1.144	0.731	0.604	0.684	1.009	0.423	0.385	0.792	0.631	0.495	0.658	0.515	0.471	0.458	0.446	0.78	0.446	0.742	0.534	0.686	1.149	0.988
CPI-SS025C8F785	CLEC2B_KLRF1	simple:Q92478	simple:Q9NZS2	CLEC2B	KLRF1	False	True	True	curated	False	0.175	1.475	1.237	2.008	1.791	2.343	1.228	2.301	1.273	1.396	1.354	1.444	1.403	1.46	1.418	1.68	1.464	2.016	1.974	1.643	1.404	2.175	1.958	2.51	1.395	2.468	1.44	1.583	1.366	1.918	1.876	1.509	1.467	1.279	1.268	1.363	1.699	1.657	1.309
CPI-SS0C28FEC7D	TNFSF13_TNFRSF14	simple:O75888	simple:Q92956	TNFSF13	TNFRSF14	True	False	True	I2D,InnateDB-All	False	0.175	0.848	0.93	0.898	0.774	1.122	0.701	0.654	0.653	0.923	0.938	0.725	0.939	1.05	0.904	0.753	0.822	0.904	0.872	0.748	1.096	0.674	0.628	0.626	0.897	0.912	0.699	0.912	1.023	0.877	0.726	0.704	0.785	0.754	0.978	0.779	0.793	0.794	0.905
CPI-SS00F979E99	ICAM3_CLEC4M	simple:P32942	simple:Q9H2X3	ICAM3	CLEC4M	True	False	True	curated	False	0.175	0.927	1.378	1.198	0.736	1.352	0.929	1.38	1.2	0.738	1.354	0.916	0.736	0.891	1.316	1.767	1.588	1.125	1.742	1.123	1.574	1.395	0.932	1.549	1.212	1.663	1.484	1.021	1.638	0.846	0.821	0.906	1.357	1.177	1.332	1.268	1.718	1.539	1.076
CPI-SC0017F527E	COL18A1_a10b1	complex	simple:P39060	complex:a10b1	complex	COL18A1	True	False	False	curated	True	0.177	0.433	0.715	0.479	0.845	1.419	0.456	0.422	0.501	0.631	1.204	0.638	0.402	0.768	1.342	0.379	0.412	0.694	0.457	0.824	1.397	0.434	0.401	0.445	0.575	1.149	0.474	0.756	0.519	0.886	1.459	0.496	0.463	0.59	0.872	0.635	1.002	1.575
CPI-SS0C5E9FBFB	NECTIN1_NECTIN3	simple:Q15223	simple:Q9NQS3	NECTIN1	NECTIN3	True	True	False	curated	False	0.177	0.54	0.581	0.917	0.874	0.714	0.619	0.66	0.996	0.953	0.793	0.717	0.559	0.758	1.094	1.051	0.891	0.512	0.553	0.889	0.846	0.686	1.9	1.743	1.556	1.602	1.942	1.612	2.277	2.235	1.517	2.074	0.984	0.826	0.64	0.686	1.025	0.695	1.361
CPI-SS0A9E884E0	CD200_CD200R1	simple:P41217	simple:Q8TD46	CD200	CD200R1	True	False	True	curated	False	0.179	1.651	1.141	1.095	1.173	1.631	1.051	1.032	1.016	1.127	1.241	1.15	1.105	1.148	1.111	0.601	0.555	0.633	1.091	0.511	0.492	0.476	0.587	0.701	0.61	0.564	0.608	0.828	0.318	0.349	0.808	0.304	0.417	0.327	0.325	1.117	0.607	0.561	0.638
CPI-SS0B81F1BF5	TNF_SEMA4C	simple:P01375	simple:Q9C0C4	TNF	SEMA4C	True	False	True	InnateDB-All	False	0.179	0.519	0.603	0.649	0.979	0.616	0.552	0.499	0.7	0.746	1.076	0.506	0.836	0.514	0.561	0.891	0.553	0.636	0.683	1.013	0.84	0.855	0.64	0.586	0.595	0.827	0.631	0.645	0.762	0.709	0.91	0.957	1.287	0.656	0.577	0.519	0.565	0.896	0.68
CPI-SS03A0C857B	FAS_FASLG	simple:P25445	simple:P48023	FAS	FASLG	True	True	False	curated	False	0.181	0.989	1.261	1.347	1.05	1.2	0.989	1.075	0.778	0.927	0.882	0.968	0.821	0.873	0.959	0.811	1.247	0.781	1.519	0.85	1.605	1.308	0.769	1.458	0.92	1.719	1.253	1.992	1.322	2.078	1.781	1.241	1.93	1.392	0.897	0.983	0.835	0.953	1.226
CPI-SS0DE0A486F	NRP1_VEGFA	simple:O14786	simple:P15692	NRP1	VEGFA	True	True	False	curated	False	0.181	0.658	0.307	0.844	0.937	0.538	0.653	0.818	0.573	0.587	0.501	0.515	0.531	1.043	0.692	0.534	1.229	1.322	0.923	1.038	1.203	0.32	0.334	0.789	0.439	0.28	0.975	1.069	0.67	0.784	0.949	0.695	0.345	0.881	0.975	0.575	0.69	0.855	0.307
CPI-CS04F158618	IL17	receptor	AC_IL17A	complex:IL17	receptor	AC	simple:Q16552	IL17A	True	True	False	curated	False	0.181	0.445	2.362	0.429	0.379	0.444	2.361	0.428	0.378	0.432	2.349	0.416	0.366	0.681	2.599	0.666	0.616	0.564	2.481	0.548	0.498	0.459	2.376	0.443	0.393	1.316	3.233	1.3	1.25	0.68	2.597	0.664	0.614	0.748	2.666	0.733
CPI-SS09A3FA737	NAMPT_P2RY6	simple:P43490	simple:Q15077	NAMPT	P2RY6	True	False	True	IMEx,IntAct	False	0.181	1.267	2.051	1.308	1.286	2.07	1.327	1.84	2.722	3.506	2.441	2.454	2.47	2.763	1.613	2.396	1.332	1.345	1.36	1.654	1.274	2.058	1.315	1.795	2.578	1.514	1.527	1.542	1.835	1.92	2.03	1.287	1.494	2.278	1.535	1.273	2.057	1.314	1.217
CPI-SS00581282E	C5_C5AR1	simple:P01031	simple:P21730	C5	C5AR1	True	False	True	guidetopharmacology.org	False	0.181	1.299	1.511	1.226	1.579	1.13	1.811	1.28	1.492	1.207	1.56	1.111	1.792	1.37	1.583	1.298	1.651	1.202	1.882	0.709	1.769	1.982	1.696	2.05	1.6	2.281	1.205	1.417	1.132	1.485	1.036	1.717	1.351	1.563	1.278	1.631	1.182	1.863	1.461
CPI-SS0A7E3A1AF	C5_C5AR2	simple:P01031	simple:Q9P296	C5	C5AR2	True	False	True	guidetopharmacology.org	False	0.184	0.232	0.239	0.929	0.578	0.556	0.597	0.858	0.212	0.909	0.558	0.537	0.578	0.839	0.303	0.31	1	0.649	0.628	0.668	0.93	0.702	0.709	1.399	1.048	1.026	1.067	1.328	0.835	0.483	0.462	0.503	0.764	0.283	0.291	0.98	0.629	0.608	0.649
CPI-SS0431D2256	TNFSF9_TNFRSF9	simple:P41273	simple:Q07011	TNFSF9	TNFRSF9	True	False	True	curated	False	0.186	1.296	0.664	0.8	1.772	2.133	1.167	0.816	0.659	0.646	0.651	0.699	0.596	0.879	1.355	1.717	0.75	0.887	1.363	1.725	0.759	0.889	1.365	1.726	0.76	0.95	1.426	1.788	0.822	1.572	0.94	1.076	2.048	2.409	1.443	1.092	0.935	0.922	0.927
CPI-SC070D5A96F	JAM2_a4b1	complex	simple:P57087	complex:a4b1	complex	JAM2	False	False	False	curated	True	0.186	0.635	1.049	1.036	1.447	1.138	0.834	1.082	0.988	1.092	1.113	0.943	0.894	1.263	1.004	0.991	1.402	1.093	0.789	1.037	0.943	1.047	1.068	0.898	0.849	1.218	0.93	0.917	1.328	1.02	0.715	0.964	0.869	0.973	0.994	0.824	0.775	1.144
CPI-SS04641FE5F	CCL3L1_DPP4	simple:P16619	simple:P27487	CCL3L1	DPP4	True	False	True	I2D	False	0.188	0.789	1.069	0.99	1.223	0.605	0.885	0.806	1.038	0.807	0.728	0.96	0.785	0.706	0.939	0.665	0.997	0.647	0.658	1.277	0.708	1.198	1.431	0.798	0.719	0.951	0.806	0.727	0.959	0.825	0.746	0.979	0.781	0.835	1.167	0.817	0.829	1.448	0.878
CPI-SS06CBC985C	LTBR_LTB	simple:P36941	simple:Q06643	LTBR	LTB	False	True	False	curated	False	0.188	1.216	1.534	0.808	1.586	0.591	1.497	1.183	0.687	1.498	1.816	1.091	1.868	0.873	1.779	1.465	1.207	1.525	0.799	1.577	1.488	1.174	1.213	1.531	0.806	1.583	1.494	1.18	1.222	1.54	0.814	1.592	1.503	1.189	0.892	0.645	1.703	0.673	0.79
CPI-SC09E5431A2	IFNG_Type	II	IFNR	simple:P01579	complex:Type	II	IFNR	IFNG	True	False	True	curated	False	0.188	0.568	0.919	0.757	1.032	0.636	0.609	0.835	0.604	1.325	1.218	1.311	1.016	1.409	0.682	0.975	0.868	0.961	0.666	1.059	0.804	0.916	0.719	1.209	1.102	1.196	0.901	1.293	0.906	0.799	0.892	0.99	0.602	0.953	0.791	1.066
CPI-SS0829B8FD2	GRN_CLEC4M	simple:P28799	simple:Q9H2X3	GRN	CLEC4M	True	False	True	InnateDB-All	False	0.19	0.759	0.579	0.734	0.862	0.683	0.837	0.819	1.27	1.09	0.627	1.244	0.709	1.16	0.98	0.518	1.135	1.301	1.752	1.573	1.11	1.727	0.596	1.047	0.867	1.022	0.474	0.925	0.746	0.9	1.123	1.574	1.395	0.932	1.549	0.841	1.292	1.112	0.65
CPI-SC06364D669	FN1_a4b1	complex	simple:P02751	complex:a4b1	complex	FN1	True	False	False	curated	True	0.19	0.906	0.893	1.304	0.996	0.692	0.94	0.846	0.949	0.971	0.801	0.752	1.121	0.91	0.897	1.308	1	0.696	0.944	0.849	0.953	0.975	0.805	0.756	1.125	0.736	0.678	1.149	1.136	1.547	1.239	0.935	0.646	1.183	1.089	1.192	1.214	1.044
CPI-SC0A9EB628A	VCAM1_a4b1	complex	simple:P19320	complex:a4b1	complex	VCAM1	False	False	False	curated	True	0.19	1.02	0.802	0.963	1.434	1.421	1.832	0.905	0.871	1.524	1.22	0.93	1.468	1.373	0.866	1.477	1.498	1.329	1.279	1.649	0.92	0.907	1.318	1.01	0.954	0.86	0.963	0.985	0.815	1.135	0.929	0.916	1.327	1.019	0.963	0.868	0.972	0.993
CPI-SS08991B378	CD6_ALCAM	simple:P30203	simple:Q13740	CD6	ALCAM	True	False	False	curated	False	0.19	0.774	0.846	1.16	0.753	1.122	0.807	0.779	1.189	1.786	0.794	0.934	1.037	0.766	0.729	0.795	1.392	0.54	0.643	0.789	0.751	0.818	1.415	0.563	0.666	0.898	0.97	1.285	0.878	1.247	0.931	0.903	1.314	1.911	0.919	1.059	1.162	0.552	0.581
CPI-SS039799099	FGFR1_NCAM1	simple:P11362	simple:P13591	FGFR1	NCAM1	True	True	True	curated	False	0.193	0.729	0.569	0.922	0.595	0.603	0.764	0.603	0.956	0.63	0.638	0.681	0.873	0.546	0.554	0.855	0.694	1.047	0.72	0.728	0.817	0.657	1.01	0.683	0.691	0.702	0.542	0.895	0.568	0.576	0.796	0.635	0.988	0.661	0.67	0.727	0.567	0.92	0.593
CPI-SS048346C2B	LGALS9_MRC2	simple:O00182	simple:Q9UBG0	LGALS9	MRC2	True	False	True	InnateDB-All	False	0.193	0.406	0.499	0.801	0.362	0.455	0.758	0.518	0.74	0.486	0.555	0.833	1.136	0.425	0.728	0.805	1.027	0.773	0.842	1.12	1.422	0.515	0.737	0.483	0.552	0.83	1.133	0.532	0.624	0.927	0.522	0.744	0.49	0.559	0.837	1.139	0.494	0.797	0.558
CPI-CS0715DE78D	CD94:NKG2A_HLA-E	complex:CD94:NKG2A	simple:P13747	HLA-E	False	True	False	curated	False	0.193	2.442	2.234	1.921	1.96	2.295	2.426	1.905	2.234	2.3	2.376	2.334	2.468	2.325	2.098	2.13	1.932	2.487	2.015	2.508	2.3	1.986	2.026	2.361	2.491	1.97	2.299	2.366	2.442	2.399	2.533	2.391	2.164	2.195	1.998	2.553	2.08	2.935	2.091	2.728
CPI-SS0859C173B	TNFSF14_LTBR	simple:O43557	simple:P36941	TNFSF14	LTBR	True	False	True	curated	False	0.193	0.685	0.889	0.635	0.828	0.813	0.803	0.7	0.638	0.623	0.613	0.581	0.829	1.034	0.779	0.972	0.957	0.947	0.833	1.116	0.824	0.831	0.839	1.32	1.066	1.259	1.244	1.234	0.696	0.635	0.62	0.592	0.604	0.919	1.201	0.91	0.916	0.925	1.406
CPI-SS03EF699C7	HLA-E_KLRC1	simple:P13747	simple:P26715	HLA-E	KLRC1	False	False	True	curated	False	0.193	2.442	2.508	2.935	1.968	2.524	2.091	2.234	2.3	2.728	2.316	1.921	1.986	2.414	2.003	1.96	2.026	2.454	2.042	2.295	2.361	2.789	1.821	2.377	2.426	2.491	2.919	1.951	2.508	2.2	2.265	1.854	1.905	1.97	2.398	1.987	2.234	2.299	2.727
CPI-SS056FF4363	CD48_CD244	simple:P09326	simple:Q9BZW8	CD48	CD244	False	False	True	curated	False	0.195	1.308	1.756	1.83	1.404	1.699	1.563	1.358	1.807	1.272	1.88	1.454	1.749	1.238	1.614	1.659	1.733	1.307	1.602	1.467	1.525	1.599	1.468	1.332	1.534	1.607	1.476	1.341	1.348	1.421	1.29	1.64	1.713	1.287	1.582	1.447	1.437	1.51	1.379
CPI-SS0E4B1484B	ICOSLG_ICOS	simple:O75144	simple:Q9Y6W8	ICOSLG	ICOS	True	False	True	curated	False	0.195	0.505	1.628	0.84	0.474	1.095	0.667	1.04	0.817	0.852	2.163	1.375	1.009	1.63	1.202	1.452	1.229	1.264	2.575	1.787	1.42	2.042	1.614	0.469	1.591	0.804	0.437	1.058	0.63	1.741	1.517	1.552	2.863	2.076	1.709	2.33	1.902	0.66	1.783
CPI-SS085EE60B1	TGFB1_TGFBR3	simple:P01137	simple:Q03167	TGFB1	TGFBR3	True	False	True	curated	False	0.197	1.331	1.447	1.275	1.77	1.375	1.478	1.211	1.471	1.432	1.548	1.224	1.376	1.871	1.196	1.312	1.635	1.516	1.632	1.309	1.46	1.191	1.207	1.955	1.161	1.316	1.498	1.598	1.187	1.714	1.39	1.542	1.273	1.289	2.037	1.243	1.527	1.643	1.32
CPI-SS012B7C21D	NOTCH1_DLL4	simple:P46531	simple:Q9NR61	NOTCH1	DLL4	False	True	False	curated	False	0.197	0.516	1.144	1.222	0.983	1.017	1.096	0.856	1.006	1.084	0.844	0.62	0.752	0.587	1.38	1.459	1.219	0.956	1.034	0.795	0.81	0.943	0.778	1.571	1.649	1.41	0.647	0.78	0.615	1.408	1.487	1.247	0.474	1.102	1.181	0.941	0.907	0.986	0.746
CPI-SS030BB46BB	ANXA1_FPR2	simple:P04083	simple:P25090	ANXA1	FPR2	True	False	True	curated	False	0.2	1.671	1.096	1.631	1.081	1.255	1.331	1.292	1.062	1.091	1.386	1.346	1.578	1.538	1.163	1.213	1.174	2.026	2.977	2.402	2.104	2.937	2.387	2.561	2.011	1.437	1.972	1.421	1.596	1.342	1.303	1.114	2.065	1.49	1.192	2.025	1.475	1.649	1.46
CPI-SS0B87FE6E0	NOTCH1_JAG1	simple:P46531	simple:P78504	NOTCH1	JAG1	False	True	False	curated	False	0.202	0.572	1.582	0.732	0.521	1.455	0.606	1.443	0.594	0.808	0.717	1.818	0.969	0.653	0.758	0.695	0.686	1.393	0.544	0.999	0.908	2.009	1.159	0.844	0.948	0.886	0.876	0.836	0.745	1.846	0.997	0.681	0.785	0.723	0.714	0.53	1.54	0.691	1.345
CPI-SS06207F70E	CD226_NECTIN2	simple:Q15762	simple:Q92692	CD226	NECTIN2	False	True	True	curated	False	0.202	0.357	0.5	0.555	0.4	0.766	0.415	0.404	0.546	0.602	0.447	0.812	0.462	0.666	0.874	0.665	0.64	0.723	1.016	1.072	0.917	1.282	0.932	0.504	0.646	0.702	0.546	0.912	0.561	0.471	0.526	0.737	0.386	0.493	0.635	0.691	0.535	0.901	0.55
CPI-SS065F7DA2A	COPA_P2RY6	simple:P53621	simple:Q15077	COPA	P2RY6	True	False	True	IMEx,IntAct	False	0.202	0.899	1.683	0.94	0.777	1.561	0.818	1.075	1.858	0.794	0.807	0.822	1.115	1.191	1.003	1.786	0.722	0.735	0.75	1.043	0.926	1.71	0.674	0.967	0.984	1.767	0.703	0.716	0.731	1.025	1.248	2.031	0.967	0.98	0.995	1.289	0.712	1.496	0.753
CPI-SS03156A825	LTA_LTBR	simple:P01374	simple:P36941	LTA	LTBR	True	False	True	I2D	False	0.204	0.411	0.616	0.362	0.555	0.54	0.53	0.382	0.587	0.332	0.525	0.51	0.5	0.49	0.695	0.44	0.633	0.618	0.608	0.564	0.846	0.555	0.561	0.57	1.051	0.796	0.989	0.974	0.964	0.643	0.925	0.634	0.64	0.649	1.13	0.876	1.068	1.054	1.043
CPI-SS08C3D27F7	NOTCH1_JAG2	simple:P46531	simple:Q9Y219	NOTCH1	JAG2	False	True	False	curated	False	0.204	0.626	0.613	0.667	0.623	0.7	0.54	0.573	0.528	0.561	0.863	0.849	0.599	0.583	0.633	0.903	0.859	0.936	0.593	1.053	1.04	0.79	0.774	0.824	1.094	1.05	1.127	0.784	0.89	0.877	0.627	0.611	0.661	0.931	0.887	0.964	0.621	0.585	0.571
CPI-SS0FC2B68F1	IAPP_IDE	simple:P10997	simple:P14735	IAPP	IDE	True	False	True	IMEx	False	0.206	0.325	0.334	0.329	0.42	0.432	0.408	0.369	0.583	0.532	0.55	0.512	0.352	0.364	0.373	0.368	0.458	0.471	0.447	0.407	0.322	0.622	0.57	0.589	0.551	0.391	0.352	0.361	0.356	0.446	0.459	0.435	0.396	0.31	0.61	0.558	0.577	0.539	0.379
CPI-SS079DDF890	TNFSF12_TNFRSF25	simple:O43508	simple:Q93038	TNFSF12	TNFRSF25	True	False	True	I2D	False	0.206	1.29	1.385	1.059	0.957	1.218	1.313	0.987	0.885	1.057	1.152	0.826	0.724	1.25	1.345	1.02	0.918	1.403	1.498	1.173	1.071	1.028	1.124	0.798	0.696	1.023	1.118	0.793	0.691	1.117	1.212	0.887	0.785	0.772	0.775	1.608	1.703	0.721	1.378
CPI-SC001669E22	GDF11_TGFR_AVR2A	simple:O95390	complex:TGFR_AVR2A	GDF11	True	False	True	curated	False	0.209	0.617	0.571	0.586	0.697	0.587	0.616	0.802	0.608	0.634	0.617	0.587	0.68	0.594	0.598	0.517	0.703	0.535	0.518	0.581	0.548	0.628	0.548	0.734	0.54	0.565	0.549	0.612	0.653	1.287	1.241	1.256	1.367	1.257	1.286	1.472	1.278	1.304	1.288	1.257
CPI-SS047CD2E9F	TNFSF9_ADGRG5	simple:P41273	simple:Q8IZF4	TNFSF9	ADGRG5	True	False	True	InnateDB-All	False	0.209	0.717	1.005	1.16	0.618	1.512	0.605	0.901	1.107	0.693	1.38	0.625	0.588	0.743	1.096	0.69	0.964	0.597	0.751	1.104	0.698	0.972	0.598	0.753	1.105	0.7	0.973	0.659	0.814	1.167	0.555	0.761	1.035	0.993	1.281	1.436	0.894	1.788	0.881
CPI-SS02A170A99	SPN_SIGLEC1	simple:P16150	simple:Q9BZZ2	SPN	SIGLEC1	True	False	False	curated	False	0.209	0.784	0.929	0.682	1.457	0.752	0.568	0.713	1.241	0.598	1.126	0.726	0.871	0.624	1.398	0.694	1.043	0.992	0.986	1.309	1.454	1.208	1.982	1.277	0.842	0.987	0.74	1.515	0.81	1.053	1.002	0.996	1.319	1.464	1.218	1.992	1.287	1.085	0.718
CPI-CS04F78ACD6	ACVR_1B2A	receptor_GDF11	complex:ACVR_1B2A	receptor	simple:O95390	GDF11	True	True	False	curated	False	0.209	0.617	0.548	1.287	0.88	0.725	0.72	0.571	1.241	0.834	0.679	0.674	0.586	1.256	0.849	0.694	0.689	0.697	0.598	0.628	1.367	0.64	0.96	0.805	0.568	0.801	0.587	1.257	0.85	0.695	0.69	0.616	0.517	0.548	1.286	0.56	0.879	0.725
CPI-SS00F282936	CXCR6_CXCL16	simple:O00574	simple:Q9H2A7	CXCR6	CXCL16	True	True	True	guidetopharmacology.org	False	0.211	0.653	0.582	0.978	1.568	0.869	0.644	1.384	1.507	1.005	1.484	1.288	1.158	0.975	1.097	0.595	1.074	0.879	0.747	1.337	0.638	1.154	1.276	0.774	1.253	1.057	0.982	0.911	1.307	1.897	0.882	0.879	1.198	0.973	0.876	1.713	1.836	1.334	1.813
CPI-SS072E1E27A	FFAR2_TNF	simple:O15552	simple:P01375	FFAR2	TNF	True	True	False	IMEx,IntAct	False	0.213	0.377	0.588	0.628	0.478	1.472	1.569	1.328	1.383	1.505	1.332	1.348	1.779	1.388	1.819	1.533	1.351	1.67	1.379	1.438	1.339	1.456	1.355	0.525	0.622	0.437	0.558	0.832	0.441	0.872	0.586	0.404	0.723	0.433	0.492	0.393	0.509	0.408	0.611
CPI-SS0EF0750A7	HLA-DRB1_OGN	simple:HLADRB1	simple:P20774	HLA-DRB1	OGN	True	True	False	InnateDB-All	False	0.215	1.885	1.422	1.709	1.336	1.895	1.951	1.302	1.064	1.074	1.129	2.494	2.031	2.318	1.945	2.504	2.56	1.911	3.034	2.571	2.858	2.484	3.044	3.099	2.451	1.579	1.116	1.404	1.589	1.645	1.836	1.374	1.661	1.287	1.846	1.902	1.253	2.573	2.11
CPI-SS0E2431C09	PDCD1_FAM3C	simple:Q15116	simple:Q92520	PDCD1	FAM3C	True	True	False	InnateDB-All	False	0.215	0.854	1.707	0.698	1.199	0.791	0.925	1.259	0.881	1.317	1.369	1.043	0.726	1.116	0.98	0.911	1.267	0.884	0.722	1.32	0.813	0.872	0.931	0.983	0.73	0.88	1.242	0.735	0.794	0.853	0.905	0.803	1.362	0.855	0.914	0.972	1.025	0.772	0.922
CPI-SS0F00D756A	CD40_TNFSF13B	simple:P25942	simple:Q9Y275	CD40	TNFSF13B	True	True	False	I2D,InnateDB	False	0.215	1.566	1.08	0.874	0.944	1.052	0.868	1.083	0.924	1.725	1.402	1.919	1.58	1.631	1.638	1.152	0.945	1.015	1.124	0.94	1.155	0.996	1.797	1.474	1.991	1.652	1.703	0.966	0.48	0.452	0.483	1.125	0.802	1.319	0.98	1.031	0.915	0.429	0.402
CPI-SS0837E9F59	JAG1_NOTCH4	simple:P78504	simple:Q99466	JAG1	NOTCH4	False	False	True	curated	False	0.215	0.337	0.766	0.697	0.381	1.837	0.7	0.503	0.522	0.304	0.575	0.321	0.6	0.356	0.246	0.675	0.606	0.29	1.746	0.609	0.412	0.431	0.484	0.23	0.51	0.265	1.347	1.776	1.706	1.391	2.847	1.71	1.512	1.532	1.314	1.585	1.331	1.61	1.366
CPI-SS0049FD74F	TNFRSF10B_FASLG	simple:O14763	simple:P48023	TNFRSF10B	FASLG	True	True	False	I2D,InnateDB-All	False	0.215	0.716	0.989	1.075	0.777	0.927	0.68	0.952	1.038	0.741	0.89	0.752	1.025	1.111	0.813	0.963	0.593	0.866	0.952	0.655	0.804	1.453	0.987	1.726	1.056	1.812	1.514	0.975	1.664	1.126	0.693	0.965	1.051	0.754	0.904	0.612	0.885	0.971	0.673
CPI-SS03B8E2D7A	TNF_ICOS	simple:P01375	simple:Q9Y6W8	TNF	ICOS	True	False	True	InnateDB-All	False	0.218	0.65	1.773	0.985	0.618	1.239	0.811	0.747	1.87	1.082	0.715	1.337	0.909	1.629	0.841	1.096	0.668	1.684	0.896	1.151	0.723	0.683	1.806	1.018	0.651	1.273	0.845	1.633	0.845	1.1	0.672	1.648	0.861	1.115	0.687	0.957	0.734	0.769	2.08
CPI-CS0384572FE	ACVR_1B2B	receptor_GDF11	complex:ACVR_1B2B	receptor	simple:O95390	GDF11	True	True	False	curated	False	0.22	0.863	0.569	0.763	0.794	0.713	0.569	1.533	0.806	0.634	1.125	0.971	0.734	0.966	0.565	1.235	0.828	0.673	0.668	0.962	0.668	0.862	0.893	0.812	0.668	0.625	1.632	0.905	0.733	1.224	1.07	0.833	1.065	0.611	1.166	0.872	1.067	0.704
CPI-SS0AB21032D	PLXNB2_SEMA4C	simple:O15031	simple:Q9C0C4	PLXNB2	SEMA4C	False	True	True	curated	False	0.22	0.43	0.477	0.807	0.393	0.439	0.769	0.387	0.574	0.378	0.393	0.51	0.457	0.657	0.704	1.034	0.404	0.458	0.404	0.413	0.645	0.449	0.464	0.58	0.527	0.728	0.775	1.105	0.474	0.395	0.393	0.439	0.77	0.626	0.572	0.581	0.813	0.617	0.631
CPI-SC017215F7F	GDF11_TGFR_AVR2B	simple:O95390	complex:TGFR_AVR2B	GDF11	True	False	True	curated	False	0.22	0.863	0.565	0.962	1.166	0.668	0.696	0.576	0.648	0.637	0.564	0.569	0.668	0.872	0.763	0.862	1.067	0.569	0.597	0.549	0.538	0.704	0.794	0.893	1.097	0.6	0.628	0.58	0.569	0.713	0.812	1.016	0.547	0.569	0.668	0.872	0.625	0.829	1.533	1.235
CPI-SS05FEE05CB	NOTCH4_JAG2	simple:Q99466	simple:Q9Y219	NOTCH4	JAG2	False	True	False	curated	False	0.22	0.392	0.378	0.433	0.388	0.465	0.82	0.807	0.557	0.541	0.591	0.861	0.817	0.894	0.551	0.751	0.737	0.487	0.472	0.522	0.792	0.747	0.825	0.482	0.435	0.422	0.476	0.432	0.509	1.891	1.878	1.628	1.612	1.662	1.932	1.888	1.965	1.622	0.755
CPI-SS01560CA22	CD99_PILRA	simple:P14209	simple:Q9UKJ1	CD99	PILRA	True	False	True	curated	False	0.222	0.982	1.224	1.696	1.542	1.452	1.391	1.566	1.15	0.996	1.02	0.998	1.01	1.252	1.724	1.57	1.48	1.419	1.594	1.05	1.522	1.368	1.279	1.218	1.392	1.109	1.581	1.427	1.338	1.276	1.451	1.068	1.038	1.28	1.752	1.598	1.508	1.447	1.622
CPI-SS08DA48A5A	CCL3_CCR1	simple:P10147	simple:P32246	CCL3	CCR1	True	False	True	curated	False	0.222	1.163	1.091	1.281	1.555	1.4	0.917	1.035	1.309	1.154	0.875	1.149	0.993	0.911	1.185	1.029	1.147	1.397	1.12	1.133	1.141	1.772	1.7	1.89	2.164	2.009	1.17	1.015	0.925	1.199	1.044	1.187	1.031	1.184	1.029	1.563	1.814	1.537	1.549
CPI-SS0F66EA6BE	APP_FPR2	simple:P05067	simple:P25090	APP	FPR2	False	False	True	guidetopharmacology.org	False	0.222	1.086	0.511	1.046	0.495	0.67	0.444	1.395	0.82	0.522	1.355	0.804	0.979	0.525	1.476	0.901	0.603	1.436	0.886	1.061	1.012	0.438	0.973	0.422	0.597	1.117	0.542	1.077	0.527	0.701	1.914	2.864	2.29	1.991	2.825	2.274	2.449	1.085	0.51
CPI-SS0A4F27388	TNFRSF1A_FASLG	simple:P19438	simple:P48023	TNFRSF1A	FASLG	True	True	False	I2D,InnateDB-All	False	0.227	0.899	0.985	0.688	0.837	0.922	1.008	0.711	0.86	1.047	1.32	1.406	1.109	1.258	0.72	1.024	1.296	1.382	1.085	1.235	0.696	0.851	1.123	1.209	0.912	1.061	0.892	0.978	0.83	0.74	1.013	1.099	0.802	0.951	0.844	0.93	0.782	0.747	1.02
CPI-SC092659F65	ICAM4_aLb2	complex	simple:Q14773	complex:aLb2	complex	ICAM4	True	False	False	curated	True	0.227	0.77	0.902	0.943	0.757	1.022	0.994	0.705	0.704	1.126	0.85	1.167	0.982	0.716	1.246	0.783	0.851	0.983	0.706	1.024	0.839	1.103	0.729	0.861	0.902	0.717	0.981	1.028	0.738	0.737	1.16	0.883	1.201	1.016	0.749	1.28	0.816	0.665
CPI-SS0F3D40856	PGRMC2_CCL4L2	simple:O15173	simple:Q8NHW4	PGRMC2	CCL4L2	True	True	False	IMEx,IntAct	False	0.227	1.364	1.471	1.623	1.427	1.617	1.326	1.095	1.538	1.065	1.059	1.12	1.114	1.034	1.182	0.986	1.176	1.097	1.215	1.322	1.474	1.278	1.468	1.178	1.389	1.097	1.249	1.052	1.243	1.163	1.131	1.125	1.045	1.21	1.316	1.469	1.272	1.463	1.172
CPI-SS08FAC0A55	PLXNB2_SEMA4D	simple:O15031	simple:Q92854	PLXNB2	SEMA4D	False	True	True	curated	False	0.229	0.785	0.751	0.767	0.883	0.858	0.747	0.729	0.845	0.82	1.012	0.744	0.978	0.938	0.994	1.11	1.085	0.923	0.945	1.082	0.815	0.743	1.049	1.009	1.065	1.181	1.156	0.994	1.016	0.809	0.845	0.82	1.25	0.983	0.847	0.911	1.216	1.177	0.853
CPI-SC063BC3DDE	ICAM2_aLb2	complex	simple:P13598	complex:aLb2	complex	ICAM2	False	False	False	curated	True	0.229	0.921	1.053	1.094	0.909	1.173	0.935	1.014	0.977	1.056	0.946	1.025	1.123	1.255	0.979	1.296	1.111	1.375	1.056	1.188	1.229	1.044	1.308	0.957	1.036	1.033	1.165	1.206	1.021	1.285	1	1.041	1.12	0.99	1.122	1.163	1.242	1.098
CPI-SS027CDEA08	NOTCH2_DLL4	simple:Q04721	simple:Q9NR61	NOTCH2	DLL4	False	True	False	curated	False	0.234	0.284	0.912	0.991	0.751	0.373	1.002	1.08	0.841	0.584	0.717	0.552	1.345	1.424	1.184	0.891	0.969	0.73	0.744	0.876	0.712	1.505	1.583	1.344	0.392	0.525	0.36	1.153	1.232	0.992	0.918	0.996	0.757	0.572	0.704	0.539	1.332	1.411	1.171
CPI-SS08877A081	LGALS9_COLEC12	simple:O00182	simple:Q5KU26	LGALS9	COLEC12	True	False	True	InnateDB-All	False	0.238	0.723	0.679	0.509	1.057	0.518	0.505	0.523	0.536	0.503	0.515	0.566	0.635	0.649	0.796	1.344	0.805	0.792	0.809	0.823	0.79	0.802	0.853	0.922	0.506	1.054	0.515	0.502	0.52	0.533	0.5	0.512	0.563	0.632	0.848	0.427	0.513	1.061	0.522
CPI-SS0E9015902	CD47_SIRPG	simple:Q08722	simple:Q9P1W8	CD47	SIRPG	False	True	False	curated	False	0.238	1.155	1.649	0.953	0.964	1.21	0.893	1.386	0.947	1.402	1.135	1.896	1.199	0.918	1.087	1.211	1.456	1.11	1.15	1.644	0.948	0.959	1.205	1.577	1.31	2.071	1.375	1.094	1.262	1.386	1.632	1.207	0.94	1.701	1.004	1.016	1.262	1.502	1.236
CPI-SS0817CE2B3	CCL3L1_CCR1	simple:P16619	simple:P32246	CCL3L1	CCR1	True	False	True	curated	False	0.24	0.685	1.06	0.987	1.178	1.452	1.297	0.876	0.803	0.993	1.268	1.112	0.797	0.725	0.915	1.189	1.034	0.776	0.703	0.893	1.168	1.012	0.892	1.268	1.195	1.386	1.66	1.504	0.788	0.716	0.906	1.18	1.025	0.796	0.724	0.914	1.188	1.033	0.816
CPI-SS0F739D3DB	ANXA1_FPR1	simple:P04083	simple:P21462	ANXA1	FPR1	True	False	True	guidetopharmacology.org	False	0.24	1.899	1.542	2.028	1.375	1.779	1.559	1.202	1.688	1.439	1.29	1.419	1.17	1.319	1.448	1.199	1.613	1.257	1.743	1.494	1.806	1.449	1.935	1.282	1.686	1.441	1.57	1.321	1.29	1.419	1.285	1.415	2.058	3.204	2.848	2.392	3.334	2.681	3.085
CPI-SS07833475A	FGFR1_FGF7	simple:P11362	simple:P21781	FGFR1	FGF7	True	True	False	I2D	False	0.24	0.335	0.386	0.369	0.309	0.42	0.356	0.46	0.399	0.511	0.423	0.362	0.474	0.359	0.401	0.341	0.452	0.333	0.384	0.501	0.546	0.572	0.5	0.613	0.717	0.656	0.515	0.567	0.548	0.553	0.518	0.767	0.536	0.582	0.608	0.536	0.648	0.752	0.692
CPI-SS0947A8549	FLT1_VEGFB	simple:P17948	simple:P49765	FLT1	VEGFB	True	True	False	curated	False	0.24	0.633	0.815	0.367	1.814	0.365	0.39	0.622	0.403	0.34	0.892	0.718	0.756	0.938	0.49	0.32	1.937	0.488	0.513	0.745	0.318	0.376	0.41	0.526	0.463	1.015	0.841	0.455	0.387	0.927	1.109	0.661	0.491	2.108	0.659	0.684	0.916	0.489	0.547
CPI-SS0C6448B94	IL1B_ADRB2	simple:P01584	simple:P07550	IL1B	ADRB2	True	False	True	I2D	False	0.243	0.831	0.521	1.024	0.748	1.2	0.995	0.892	1.202	0.865	0.851	1.532	0.931	1.026	1.223	0.987	1.725	1.449	0.868	0.98	0.947	0.584	0.586	0.916	0.606	1.109	0.833	0.787	0.98	0.704	1.129	0.924	0.821	1.131	0.794	0.78	1.461	0.86	0.955
CPI-SS01158CABF	FFAR2_FAM3C	simple:O15552	simple:Q92520	FFAR2	FAM3C	True	True	False	IMEx,IntAct	False	0.243	1.263	0.755	0.815	0.873	0.925	0.599	0.673	0.823	1.602	1.345	2.454	1.297	1.446	1.947	1.538	1.672	2.006	1.629	2.064	2.117	1.79	1.474	1.864	1.727	1.659	2.014	1.343	1.632	1.47	0.655	1.507	1	0.726	1.059	0.682	1.118	1.17	0.843
CPI-SS076D8415B	CCL3_IDE	simple:P10147	simple:P14735	CCL3	IDE	True	False	True	IMEx,InnateDB-All,MINT	False	0.243	0.983	0.931	0.95	0.912	1.225	1.159	1.334	1.343	1.338	1.428	1.44	1.417	1.204	1.377	1.163	1.231	1.292	1.251	1.263	1.592	1.54	1.559	1.521	1.361	1.642	1.576	1.75	1.759	1.754	1.845	1.857	1.833	1.62	1.794	1.579	1.647	1.709	1.668
CPI-SS0E292C126	KLRB1_CLEC2D	simple:Q12918	simple:Q9UHP7	KLRB1	CLEC2D	False	True	True	curated	False	0.247	1.591	1.477	1.837	1.767	1.614	1.539	1.501	2.239	1.933	2.126	1.885	2.485	1.584	1.643	1.659	2.416	2.263	1.75	2.187	1.773	1.704	3.007	2.701	2.894	2.081	2.19	2.653	3.253	2.165	2.352	2.092	2.411	2.426	3.183	3.031	2.518	2.955	2.054
CPI-SS0419B80C4	LGALS9_LRP1	simple:O00182	simple:Q07954	LGALS9	LRP1	True	False	True	InnateDB-All	False	0.247	0.658	0.632	0.693	0.858	0.708	0.615	0.589	0.649	0.815	0.664	0.513	0.992	0.966	1.027	1.192	1.042	0.585	0.559	0.619	0.785	0.634	0.8	1.279	1.253	1.314	1.479	1.329	0.51	0.989	0.963	1.024	1.189	1.039	0.784	0.758	0.818	0.984	0.833
CPI-SS0E7D5974D	TNF_TNFRSF1B	simple:P01375	simple:P20333	TNF	TNFRSF1B	True	False	True	curated	False	0.247	1.13	1.172	1.49	1.421	1.135	1.587	1.227	1.127	1.214	1.157	1.269	1.588	1.518	1.232	1.684	1.347	1.277	1.444	1.402	1.332	1.499	1.205	1.524	1.454	1.168	1.621	1.351	1.281	1.448	1.366	1.296	1.463	1.438	1.309	1.337	1.425	1.25	1.244
CPI-SS0879B8E95	CD160_TNFRSF14	simple:O95971	simple:Q92956	CD160	TNFRSF14	False	True	True	curated	False	0.252	1.032	1.113	1.082	1.306	1.107	1.121	1.122	1.233	1.087	0.983	1.432	1.026	1.513	1.482	1.357	1.706	1.284	1.246	1.13	1.238	1.236	1.507	1.521	1.308	1.522	1.633	1.139	1.487	1.336	1.423	1.505	1.473	1.349	1.697	1.275	1.237	1.121	1.229
CPI-SS08B7D54A3	TNF_FAS	simple:P01375	simple:P25445	TNF	FAS	True	False	True	InnateDB-All	False	0.254	0.681	0.939	1.412	0.782	0.892	1.054	0.778	1.036	1.509	0.743	0.647	0.879	0.989	1.151	0.796	1.269	0.749	0.911	0.851	1.323	0.693	0.804	0.966	0.715	0.973	1.445	0.815	0.926	1.088	0.8	1.272	0.753	0.915	0.815	1.288	0.768	0.93	0.989
CPI-SS0339AE950	SIRPA_CD47	simple:P78324	simple:Q08722	SIRPA	CD47	False	True	True	curated	False	0.254	0.868	1.044	0.969	1.116	0.92	1.095	1.02	0.803	1.167	0.882	1.057	0.983	1.129	0.884	1.059	0.985	1.131	1.214	0.951	1.46	1.208	1.635	1.265	1.56	0.861	0.923	1.142	1.28	1.169	1.343	1.707	1.229	1.212	1.325	0.917	1.307	1.023	1.39
CPI-SS03F821467	CD96_NECTIN1	simple:P40200	simple:Q15223	CD96	NECTIN1	True	True	True	curated	False	0.256	0.934	1.013	1.111	0.906	2.294	1.378	1.041	1.073	0.95	1.011	0.938	0.894	0.935	1.758	0.841	1.517	1.519	1.03	1.109	1.207	1.002	2.39	1.474	1.137	1.168	1.045	1.107	1.034	0.99	1.03	0.839	0.918	1.016	2.199	1.283	0.946	0.978	0.855
CPI-CS06E556972	IL15	receptor_IL15	complex:IL15	receptor	simple:P40933	IL15	True	True	False	curated	False	0.256	1.541	0.796	0.889	0.872	1.204	0.979	0.904	1.11	0.894	1.206	0.869	0.974	1.266	1.231	1.265	1.215	2.065	1.245	1.194	1.203	1.32	1.412	1.274	1.275	1.396	1.727	1.503	1.428	1.634	1.418	1.645	0.9	0.993	0.976	1.308	1.083	1.008
CPI-SC0EB8DC52F	CD47_SIRB1	complex	simple:Q08722	complex:SIRB1	complex	CD47	False	True	True	curated	False	0.256	0.98	0.913	1.057	1.38	0.822	1.184	0.794	1.117	0.921	1.226	1.16	1.303	1.02	1.626	1.069	1.43	0.841	0.975	0.908	1.052	1.375	0.817	1.179	1.402	1.335	1.479	1.196	1.802	1.244	1.606	1.031	0.965	1.109	0.826	1.432	0.874	1.235
CPI-SS073C1B796	CD52_SIGLEC10	simple:P31358	simple:Q96LC7	CD52	SIGLEC10	True	False	False	curated	False	0.259	1.265	1.182	1.005	0.895	1.223	0.911	1.643	1.723	2.244	1.658	1.603	2.162	1.985	1.875	2.203	1.89	1.38	1.298	1.121	1.011	1.339	1.027	1.135	1.053	1.094	1.584	1.664	2.185	1.598	1.543	2.102	1.925	1.815	2.143	1.831	1.123	1.04	1.081
CPI-SS02EBC1BB0	TNF_NOTCH1	simple:P01375	simple:P46531	TNF	NOTCH1	True	False	True	I2D	False	0.261	0.77	0.961	0.798	0.823	0.637	0.932	0.867	1.058	0.895	0.92	0.734	0.709	1.029	0.818	0.679	0.788	0.682	0.873	0.734	0.843	0.804	0.994	0.832	0.856	0.965	0.821	0.792	0.837	0.808	0.841	0.714	0.703	1.078	1.268	1.106	0.8	1.13	0.944
CPI-SS0E5593D5C	BMP8B_PLAUR	simple:P34820	simple:Q03405	BMP8B	PLAUR	True	False	True	InnateDB-All	False	0.261	1.611	0.874	0.601	0.9	1.424	1.152	1.62	1.063	1.72	1.609	0.873	0.6	0.899	1.422	1.151	1.619	1.061	1.719	1.616	0.879	0.606	0.905	1.429	1.157	1.625	1.068	1.725	0.692	0.505	2.013	1.277	1.004	1.303	0.939	0.516	0.654	0.533	1.826
CPI-SS0A76A8E97	HLA-F_LILRB2	simple:P30511	simple:Q8N423	HLA-F	LILRB2	False	False	True	curated	False	0.261	1.151	1.126	1.381	1.91	1.568	1.728	1.797	1.794	1.372	1.19	1.259	1.256	1.562	1.22	1.379	1.448	1.446	1.104	1.625	1.282	1.442	1.511	1.508	1.157	1.131	1.386	1.916	1.573	1.733	1.802	1.799	1.317	1.846	1.504	1.664	1.733	1.73	1.319
CPI-SS048A2311A	TNF_RIPK1	simple:P01375	simple:Q13546	TNF	RIPK1	True	False	True	I2D,IMEx,InnateDB,InnateDB-All,IntAct,MINT	False	0.265	0.956	0.929	0.804	0.856	0.948	0.772	0.801	1.053	1.026	0.901	0.953	0.833	0.777	1.045	0.869	0.8	0.898	0.813	0.805	0.868	0.84	0.86	0.99	0.962	0.838	0.889	0.982	0.835	0.963	0.819	0.956	1.264	1.236	0.96	0.993	1.112	0.982	1.163
CPI-SS060B82BBC	JAG1_NOTCH2	simple:P78504	simple:Q04721	JAG1	NOTCH2	False	False	True	curated	False	0.265	0.429	0.773	0.932	0.581	0.76	0.585	0.573	0.408	0.368	0.408	0.407	0.418	0.985	0.726	0.739	0.573	0.832	0.682	0.842	0.49	0.669	0.494	0.482	0.894	0.635	0.648	0.482	0.741	1.35	1.439	1.783	1.328	1.942	1.591	1.355	1.77	1.318	1.595
CPI-SS067BA9202	LAIR1_LILRB4	simple:Q6GTX8	simple:Q8NHJ6	LAIR1	LILRB4	False	True	True	curated	False	0.268	1.47	0.734	0.858	0.52	0.837	0.673	1.442	0.705	0.829	0.491	0.809	0.644	1.494	0.758	0.882	0.543	0.861	0.697	0.645	0.615	0.608	1.948	0.612	1.211	1.335	0.997	1.315	1.15	1.48	0.744	0.868	0.529	0.847	0.683	1.394	0.658	0.782	0.443
CPI-SC0329D5397	ICAM3_aLb2	complex	simple:P32942	complex:aLb2	complex	ICAM3	False	False	False	curated	True	0.27	1.394	1.525	1.249	1.567	1.381	1.645	1.182	1.395	1.527	1.251	1.568	1.383	1.647	1.783	1.493	1.27	1.492	1.915	1.638	1.244	1.247	1.956	1.771	1.504	2.035	1.571	1.42	1.423	1.369	1.59	1.3	1.299	1.722	1.445	1.763	1.578	1.311
CPI-SS07D71C546	NOTCH2_IL24	simple:Q04721	simple:Q13007	NOTCH2	IL24	True	True	False	IMEx,InnateDB-All,MINT	False	0.27	0.627	0.362	0.717	0.452	0.608	0.698	1.06	0.605	0.603	0.635	0.569	0.795	0.569	0.562	0.606	0.768	0.858	1.22	0.765	0.763	0.794	0.729	0.955	0.728	0.722	0.417	0.506	0.868	0.414	0.411	0.443	0.377	0.603	0.37	0.633	0.596	0.686	1.048
CPI-SS0D57FCA8C	IDE_CCL23	simple:P14735	simple:P55773	IDE	CCL23	True	True	False	InnateDB-All	False	0.274	0.693	1.995	0.374	0.753	0.627	1.929	0.687	0.362	0.801	2.103	0.398	0.482	0.862	0.371	0.81	2.112	0.407	0.491	0.871	0.366	0.805	2.107	0.402	0.486	0.866	0.456	0.896	0.421	0.409	2.198	0.493	0.577	0.956	0.468	0.908	0.433	0.422	2.21
CPI-SS033E6DE7E	NRP1_VEGFB	simple:O14786	simple:P49765	NRP1	VEGFB	True	True	False	curated	False	0.274	0.652	0.834	0.386	1.833	0.384	0.409	0.641	0.306	0.422	0.359	0.911	0.737	0.565	0.497	1.037	1.219	0.771	0.601	2.218	0.769	0.794	1.026	0.599	0.657	0.691	0.497	0.807	0.744	1.296	1.122	0.539	0.783	0.965	0.518	1.965	0.515	0.54	0.773
CPI-SS00150FB64	HLA-F_LILRB1	simple:P30511	simple:Q8NHL6	HLA-F	LILRB1	True	False	True	curated	False	0.274	1.192	1.171	1.525	1.12	1.1	1.132	1.763	1.534	1.518	2.041	1.649	1.225	1.503	1.111	1.177	1.414	1.185	1.169	1.692	1.301	1.234	1.239	1.477	1.248	1.232	1.755	1.364	1.198	1.176	1.53	1.125	1.138	1.768	1.539	1.523	2.046	1.654	1.128
CPI-SS07D9A48A2	LTA_TNFRSF1B	simple:P01374	simple:P20333	LTA	TNFRSF1B	True	False	True	curated	False	0.274	1.355	1.285	1.452	1.326	1.256	1.423	1.073	1.115	1.434	1.364	1.078	1.53	1.43	1.086	1.301	1.329	1.417	1.242	1.235	1.254	1.359	1.203	1.471	1.228	1.79	1.3	1.72	1.434	1.887	1.509	1.166	1.38	1.408	1.496	1.321	1.315	1.333	1.438
CPI-SS0DBA81CCF	HLA-G_LILRB2	simple:P17693	simple:Q8N423	HLA-G	LILRB2	False	True	True	curated	False	0.274	0.497	0.472	0.727	1.256	0.914	1.074	1.143	1.14	0.897	0.555	0.714	0.784	0.781	0.983	0.641	0.8	0.87	0.867	0.948	0.606	0.765	0.834	0.832	0.709	0.684	0.65	0.939	0.643	1.468	1.126	1.286	1.355	1.352	0.608	1.137	0.795	0.954	1.024
CPI-SS02770D68F	NOTCH2_JAG2	simple:Q04721	simple:Q9Y219	NOTCH2	JAG2	False	True	False	curated	False	0.281	0.394	0.435	0.391	0.468	0.484	0.47	0.525	0.48	0.557	0.827	0.814	0.564	0.548	0.598	0.868	0.824	0.901	0.558	0.413	0.446	0.987	0.973	0.723	0.707	0.757	1.028	0.983	1.06	0.718	0.635	0.622	0.676	0.632	0.709	0.4	0.44	0.396	0.473
CPI-SS080611C5B	ALOX5_ALOX5AP	simple:P09917	simple:P20292	ALOX5	ALOX5AP	False	False	False	guidetopharmacology.org	False	0.281	1.431	0.911	1.507	0.981	1.14	1.077	0.852	0.907	1.594	1.074	1.669	1.144	1.303	1.24	0.826	0.82	1.015	0.818	1.506	0.986	1.581	1.055	1.215	1.152	0.927	1.432	0.912	1.507	0.982	1.141	1.078	0.853	1.42	0.901	1.496	0.97	1.129	1.066
CPI-SS01A07768A	CD46_JAG1	simple:P15529	simple:P78504	CD46	JAG1	False	True	False	curated	False	0.283	0.869	0.778	1.879	1.03	0.715	0.819	0.757	0.747	1.651	0.802	1.698	0.849	1.727	0.878	1.174	1.083	2.184	1.335	1.02	1.124	1.061	1.052	0.846	0.755	1.856	1.007	0.796	0.734	1.112	1.021	2.122	1.273	0.958	1.062	0.999	0.99	0.893	0.802
CPI-SS0DC4D593E	EPHB6_EFNB1	simple:O15197	simple:P98172	EPHB6	EFNB1	True	True	False	curated	False	0.286	0.449	0.258	0.431	0.274	0.371	0.59	1.034	1.018	1.353	1.162	1.019	1.335	1.178	1.028	1.092	1.275	1.493	0.505	0.314	0.488	0.33	0.427	0.646	0.482	0.291	0.464	0.307	0.404	0.622	0.539	0.524	0.859	0.667	0.524	0.841	0.683	0.533	0.597
CPI-SS0632A027A	CD44_HBEGF	simple:P16070	simple:Q99075	CD44	HBEGF	True	True	True	I2D,InnateDB-All	False	0.29	2.041	1.611	2.112	1.884	2.058	1.898	1.468	1.969	1.741	1.915	1.877	1.447	1.947	1.719	1.894	1.696	1.766	1.538	1.712	1.652	1.723	1.495	1.669	1.8	1.37	1.87	1.642	1.817	1.372	1.383	1.34	2.277	1.847	2.347	2.119	2.294	1.509	1.58
CPI-SS02B567BC7	PLXNC1_SEMA7A	simple:O60486	simple:O75326	PLXNC1	SEMA7A	False	True	False	curated	False	0.293	0.692	0.906	1.557	0.613	0.376	0.696	0.91	1.562	0.618	0.38	0.83	1.044	1.695	0.751	0.514	0.386	0.302	0.66	0.681	1.236	1.45	2.101	1.157	0.92	0.792	0.708	0.698	0.419	0.44	0.995	1.209	1.86	0.916	0.679	0.551	0.467	0.457	0.79
CPI-SS019C98396	TNFSF14_TNFRSF14	simple:O43557	simple:Q92956	TNFSF14	TNFRSF14	True	False	True	curated	False	0.293	1.007	1.088	1.057	1.281	1.081	1.096	1.097	1.208	1.062	1.091	1.151	1.233	1.201	1.077	1.425	1.226	1.241	1.028	1.241	1.352	1.206	1.055	1.438	1.519	1.488	1.363	1.712	1.29	1.252	1.136	1.244	1.242	1.513	1.527	1.314	1.528	1.639	1.145
CPI-SS06AA638A8	CD72_SEMA4D	simple:P21854	simple:Q92854	CD72	SEMA4D	False	False	True	curated	False	0.293	0.811	0.794	0.91	0.885	1.6	1.332	1.197	1.261	0.922	1.566	1.526	1.203	1.163	1.109	1.234	1.582	1.698	1.673	1.511	1.533	1.23	0.951	1.326	1.075	1.205	1.146	0.879	1.112	1.073	1.129	1.244	1.219	1.057	1.079	0.872	0.882	0.849	0.865
CPI-SS084BE3E4B	LTA_TNFRSF1A	simple:P01374	simple:P19438	LTA	TNFRSF1A	True	False	True	curated	False	0.297	0.605	0.581	0.905	0.653	0.947	0.834	1.064	0.575	0.551	0.875	0.624	0.917	0.805	1.034	0.683	0.659	0.983	0.732	1.025	0.912	1.142	0.618	0.641	1.039	1.016	0.842	0.611	0.732	0.739	0.648	0.6	0.798	0.622	1.34	1.088	1.381	1.269	1.498
CPI-SS0A42A3690	CCL4L2_VSIR	simple:Q8NHW4	simple:Q9H7M9	CCL4L2	VSIR	True	False	True	IMEx,IntAct	False	0.302	1.539	1.649	1.448	1.219	1.539	1.216	1.37	1.211	1.346	1.658	1.314	1.868	1.539	1.518	1.2	1.41	1.251	1.288	1.265	1.646	1.756	1.555	1.326	1.646	1.323	1.477	1.318	1.453	1.765	1.421	1.974	1.646	1.625	1.273	1.443	1.417	1.254	1.194
CPI-SS02EF3E1BA	TNFSF12_TNFRSF12A	simple:O43508	simple:Q9NP84	TNFSF12	TNFRSF12A	True	False	True	curated	False	0.306	0.499	0.683	0.83	0.484	0.551	0.853	0.611	0.758	0.781	0.597	0.62	0.644	0.791	0.512	0.814	0.612	0.559	0.546	0.797	0.944	0.597	0.665	0.967	0.569	0.592	0.563	0.586	0.658	0.681	0.696	0.708	0.817	0.685	0.764	0.726	0.751	0.711	0.69
CPI-SS0AFC7BACF	ADGRG5_FAM3C	simple:Q8IZF4	simple:Q92520	ADGRG5	FAM3C	True	True	False	InnateDB-All	False	0.308	1.367	0.859	0.919	0.977	1.029	0.702	0.776	0.927	0.802	1.654	1.147	0.873	1.206	0.829	1.265	1.317	0.99	1.064	0.927	0.859	1.214	0.832	0.957	1.809	0.8	1.301	0.893	1.027	1.361	0.983	1.419	1.471	1.145	0.828	1.219	1.082	1.014	1.369
CPI-SS0D5C54214	LTA_RIPK1	simple:P01374	simple:Q13546	LTA	RIPK1	True	False	True	IMEx,InnateDB-All,MINT	False	0.313	0.821	0.794	0.721	0.813	0.792	0.764	0.783	0.9	0.872	0.799	0.891	0.744	0.955	0.81	0.947	1.256	1.228	0.952	0.985	1.103	0.974	1.155	1.036	0.979	1.247	1.072	0.954	0.944	1.002	1.101	0.842	1.034	0.89	1.027	0.746	1.335	1.307	1.031
CPI-SS05CE87F88	HLA-G_LILRB1	simple:P17693	simple:Q8NHL6	HLA-G	LILRB1	True	True	True	curated	False	0.313	0.539	0.517	0.871	0.466	0.478	1.109	0.88	0.864	1.387	0.995	0.512	0.75	0.521	0.505	1.028	0.636	0.598	0.835	0.606	0.591	1.113	0.722	0.563	0.8	0.571	0.555	1.078	0.687	0.751	0.729	1.083	0.678	0.659	0.691	1.321	1.092	1.076	1.599
CPI-SS0795802F6	CCL4_SLC7A1	simple:P13236	simple:P30825	CCL4	SLC7A1	True	False	True	IMEx,IntAct	False	0.313	2.022	1.95	2.035	2.445	2.355	2.196	3.342	2.31	2.375	2.394	1.937	2.093	2.043	2.086	2.175	1.896	1.889	2.061	1.996	1.736	1.707	1.693	1.919	1.847	1.933	2.343	2.253	2.093	3.239	2.208	2.272	2.291	1.834	1.991	1.94	1.983	2.072	1.794
CPI-SS027AFFC0E	NCR3_BAG6	simple:O14931	simple:P46379	NCR3	BAG6	False	True	False	curated	False	0.317	0.941	1.037	0.742	0.85	0.865	0.767	0.922	0.941	1.037	0.742	0.851	0.866	0.767	0.923	0.82	0.888	1.015	1.252	0.955	1.348	0.815	1.052	0.907	0.839	0.885	0.839	0.843	1.161	1.176	1.077	1.233	1.012	0.889	0.986	0.799	0.814	0.871	1.266
CPI-SS028784FC6	HLA-DPA1_TNFSF9	simple:HLADPA1	simple:P41273	HLA-DPA1	TNFSF9	True	True	False	InnateDB-All	False	0.317	1.8	1.384	1.392	1.394	1.455	2.076	1.555	1.554	1.307	1.383	1.574	2.376	1.959	1.968	1.969	2.03	2.652	1.858	1.893	2.13	2.129	1.882	1.959	2.149	1.884	1.869	3.085	2.669	2.677	2.678	2.74	3.361	2.567	2.603	2.84	2.839	2.591	2.668
CPI-SS08330207B	BTLA_TNFRSF14	simple:Q7Z6A9	simple:Q92956	BTLA	TNFRSF14	False	True	True	guidetopharmacology.org	False	0.317	1.479	1.073	1.561	0.875	1.529	1.405	1.753	1.331	1.294	1.059	1.177	1.285	1.283	1.554	1.569	1.356	1.569	1.681	1.186	1.535	1.383	1.62	1.215	1.702	1.016	1.67	1.546	1.894	1.473	1.435	1.2	1.318	1.426	1.425	1.695	1.71	1.497	1.711
CPI-CS09831CCFD	IL18	receptor_IL18	complex:IL18	receptor	simple:Q14116	IL18	True	True	False	curated	False	0.32	0.487	0.337	0.391	0.574	0.77	0.712	0.487	0.865	0.6	0.71	0.715	0.535	0.769	0.518	0.952	1.147	0.676	1.09	0.623	0.6	0.444	0.45	0.504	0.687	0.882	0.411	0.825	0.358	0.71	0.444	0.554	0.559	0.38	0.614	0.363	0.796	0.992
CPI-SS07CCAD9BF	GRN_SORT1	simple:P28799	simple:Q99523	GRN	SORT1	True	False	True	IMEx,InnateDB-All,MINT	False	0.324	0.48	0.583	0.583	0.534	0.686	0.612	0.779	0.623	0.815	0.617	0.647	0.991	0.941	1.094	0.692	0.786	0.503	0.669	0.513	0.706	0.507	0.538	0.881	0.832	0.984	0.582	0.676	1.095	1.262	1.106	1.298	1.099	1.13	1.473	1.424	1.577	1.174	1.268
CPI-SS03105D292	CSF1_SLC7A1	simple:P09603	simple:P30825	CSF1	SLC7A1	True	False	True	I2D	False	0.324	0.448	0.376	0.461	0.871	0.781	0.622	1.768	0.736	0.801	0.82	0.363	0.519	0.469	0.511	0.601	0.487	0.728	0.638	0.478	1.625	0.593	0.658	0.677	0.376	0.368	0.458	0.689	0.599	0.439	1.585	0.554	0.618	0.637	0.418	0.419	0.433	0.843	0.753
CPI-SS044C72D0D	SEMA4A_PLXND1	simple:Q9H3S1	simple:Q9Y4D7	SEMA4A	PLXND1	False	False	True	curated	False	0.329	0.846	0.609	0.506	0.553	0.958	0.721	0.618	1.054	1.048	0.988	0.968	0.966	0.893	1.033	1.101	1.221	1.098	1.056	1.626	1.083	1.389	0.954	1.286	0.891	0.844	0.607	0.504	0.65	0.644	0.584	0.564	0.562	0.629	0.698	0.817	0.695	0.652	1.222
CPI-SS00B1BEE64	CD2_CD58	simple:P06729	simple:P19256	CD2	CD58	False	True	False	curated	False	0.329	1.304	1.214	1.242	1.163	1.547	1.479	1.74	1.115	1.693	1.403	1.416	1.401	1.404	1.357	1.312	1.708	1.862	1.479	1.473	1.724	1.114	1.082	1.236	1.098	1.261	1.193	1.454	1.407	1.117	1.129	1.115	1.118	1.421	1.575	1.192	1.186	1.438	1.623
CPI-SS0F8EFEECF	TNF_DAG1	simple:P01375	simple:Q14118	TNF	DAG1	True	False	True	InnateDB-All	False	0.331	0.514	0.667	0.463	0.539	0.711	0.694	0.532	1.096	0.511	0.611	0.764	0.504	0.56	0.636	0.808	0.791	0.474	0.51	0.525	0.629	1.194	0.523	0.568	0.551	0.953	0.578	0.623	0.606	1.008	0.547	0.7	0.496	0.572	0.744	0.728	0.565	1.13	0.527
CPI-SS04F3A1E5C	COPA_SORT1	simple:P53621	simple:Q99523	COPA	SORT1	True	False	True	IMEx,InnateDB-All,IntAct,MatrixDB	False	0.331	0.769	0.805	0.98	0.931	1.083	0.775	0.858	0.809	0.962	0.777	0.944	0.788	0.98	0.782	0.813	1.156	1.106	1.259	0.857	0.951	0.705	0.872	0.716	0.908	0.741	1.084	1.034	1.187	0.785	0.879	0.796	0.832	1.007	0.958	1.111	0.802	0.853	0.889
CPI-SC08923F7F7	F11R_aLb2	complex	simple:Q9Y624	complex:aLb2	complex	F11R	False	True	False	curated	True	0.331	0.772	0.904	0.945	1.024	0.767	0.899	0.94	1.019	0.824	0.956	0.997	0.812	1.076	1.128	0.838	0.837	1.26	0.983	1.301	1.115	0.849	1.379	0.916	1.858	1.568	1.345	1.228	1.567	1.99	1.713	1.248	1.319	1.322	2.031	1.846	1.579	2.11
CPI-SS0110361CB	LTA_TNFRSF14	simple:P01374	simple:Q92956	LTA	TNFRSF14	True	False	True	curated	False	0.331	0.815	1.008	0.808	0.823	0.824	0.935	0.789	0.786	0.978	0.779	0.794	0.794	0.905	0.812	0.894	0.862	1.086	0.887	0.901	0.902	1.013	0.867	1.168	1.25	1.218	1.094	1.442	1.02	0.983	0.866	0.974	0.972	1.243	1.258	1.045	1.258	1.369	0.875
CPI-SS077B160B9	IL15_IL15RA	simple:P40933	simple:Q13261	IL15	IL15RA	True	False	True	guidetopharmacology.org	False	0.336	0.741	0.588	1.025	0.706	0.553	0.99	0.74	0.586	1.024	0.69	0.536	0.974	1.017	0.982	1.006	0.976	1.175	1.151	1.23	1.54	1.037	1.209	1.104	1.089	1.164	1.054	1.386	1.078	1.193	0.949	1.824	0.95	0.721	0.567	1.005	0.669	0.515	0.953
CPI-SS0E0DEA7D5	PECAM1_CD38	simple:P16284	simple:P28907	PECAM1	CD38	False	True	True	curated	False	0.338	0.643	1.278	1.021	1.172	0.852	0.76	1.056	0.799	0.95	0.63	1.058	0.801	0.952	0.632	1.05	0.793	0.944	0.623	0.613	0.617	0.83	1.465	0.727	1.208	1.359	1.038	0.947	0.597	0.602	0.814	1.449	0.711	1.192	1.343	1.023	0.931	1.016	0.759
CPI-SS02A0FF87F	FAM3C_CLEC2D	simple:Q92520	simple:Q9UHP7	FAM3C	CLEC2D	True	False	True	IMEx,InnateDB-All,IntAct	False	0.338	1.367	1.253	1.613	1.543	1.39	1.315	1.355	1.286	2.219	1.912	2.105	1.292	1.402	1.864	2.465	1.377	1.563	1.304	1.622	1.638	2.395	2.242	1.73	2.167	1.266	1.345	1.267	1.308	1.238	1.21	1.456	1.387	1.234	1.711	1.405	1.598	1.357	1.958
CPI-SS04B4619D0	TNF_TNFRSF1A	simple:P01375	simple:P19438	TNF	TNFRSF1A	True	False	True	curated	False	0.338	0.74	0.716	1.04	0.788	1.082	0.969	1.199	0.837	0.813	0.64	0.595	1.137	0.886	1.179	1.066	1.296	0.597	0.897	0.645	0.939	0.826	1.056	0.652	0.628	0.952	0.7	0.994	0.881	1.111	0.774	0.75	1.074	0.822	1.115	1.003	1.232	0.901	0.649
CPI-SC0F4AC5AA2	ICAM1_aLb2	complex	simple:P05362	complex:aLb2	complex	ICAM1	False	True	False	curated	True	0.34	0.934	1.013	0.87	1.002	1.043	0.858	1.122	0.951	1.03	1.399	1.109	0.886	1.108	1.531	1.255	1.572	1.387	1.121	1.651	1.188	1.036	1.039	0.986	1.111	1.243	0.967	1.285	1.099	1.363	0.9	1.085	1.217	0.941	1.258	1.073	1.337	0.874
CPI-SS0E9A581F8	ICAM1_ITGAL	simple:P05362	simple:P20701	ICAM1	ITGAL	False	True	True	curated	False	0.34	0.934	1.013	0.87	1.002	1.043	0.858	1.122	0.951	1.03	1.399	1.109	0.886	1.108	1.531	1.255	1.572	1.387	1.121	1.651	1.188	1.036	1.039	0.986	1.111	1.243	0.967	1.285	1.099	1.363	0.9	1.085	1.217	0.941	1.258	1.073	1.337	0.874	0.951
CPI-SS095E52E66	TNFSF10_TNFRSF10D	simple:P50591	simple:Q9UBN6	TNFSF10	TNFRSF10D	True	False	True	curated	False	0.34	0.398	0.49	0.448	0.798	0.539	0.384	0.475	0.434	0.784	0.524	0.357	0.529	0.621	0.58	0.929	0.67	0.381	0.473	0.431	0.781	0.522	0.588	0.505	0.5	0.474	0.568	0.55	0.491	0.76	0.852	0.81	1.16	0.901	0.466	0.383	0.378	0.446	0.428
CPI-SS059EEFDC6	MIF_TNFRSF10D	simple:P14174	simple:Q9UBN6	MIF	TNFRSF10D	True	False	True	I2D,IntAct	False	0.347	0.807	0.979	1.071	1.029	1.379	1.12	0.876	0.779	0.951	1.043	1.001	1.351	1.092	0.787	1.126	1.043	1.039	1.012	1.106	1.088	1.029	1.298	1.39	1.349	1.698	1.439	1.118	1.035	1.031	1.004	1.098	1.08	1.021	1.29	1.382	1.341	1.69	1.431
CPI-SS03133B4F2	TFRC_TNFSF13B	simple:P02786	simple:Q9Y275	TFRC	TNFSF13B	True	True	False	IMEx,IntAct	False	0.349	0.914	1.073	0.75	1.268	0.928	0.979	1.045	1.204	0.881	1.398	1.059	1.11	1.034	1.193	0.87	1.387	1.048	1.099	0.933	1.093	0.769	1.287	0.948	0.999	0.971	1.13	0.807	1.324	0.985	1.036	1.141	0.655	0.659	1.3	0.977	1.495	1.156	1.206
CPI-SC098C06330	TGFB1_TGFbeta	receptor1	simple:P01137	complex:TGFbeta	receptor1	TGFB1	True	False	True	curated	False	0.349	1.696	1.293	2.384	1.278	1.175	1.499	1.241	1.402	1.301	1.989	1.404	2.092	1.207	1.825	1.397	2.085	1.233	1.797	1.394	2.485	1.379	1.276	1.203	1.6	1.221	1.341	1.502	1.561	2.249	1.364	1.266	1.242	1.318	1.881	1.479	2.57	1.464
CPI-SS05D23BCE8	HLA-DPB1_TNFSF13B	simple:HLADPB1	simple:Q9Y275	HLA-DPB1	TNFSF13B	True	True	False	InnateDB-All	False	0.351	1.927	1.441	1.235	1.305	1.413	1.229	1.444	1.285	2.086	1.763	2.28	1.941	1.992	1.277	1.471	1.183	2.51	2.024	1.818	1.888	1.997	1.812	2.028	1.868	2.669	2.346	2.864	2.524	2.575	1.194	3.162	2.677	2.47	2.54	2.649	2.465	2.68	2.52
CPI-SS061A7E099	CD55_ADGRE5	simple:P08174	simple:P48960	CD55	ADGRE5	True	True	True	curated	False	0.356	2.086	1.92	2.17	1.952	1.775	2.309	2.31	2.212	2.019	2.096	2.305	1.756	1.903	2.554	2.387	2.137	1.997	1.938	2.638	2.419	2.243	1.883	1.887	2.776	2.778	2.68	2.487	2.563	2.772	2.224	2.054	1.943	2.37	2.053	2.012	1.846	2.096	1.877
CPI-SS098425155	ADRB2_VEGFB	simple:P07550	simple:P49765	ADRB2	VEGFB	True	True	False	InnateDB-All	False	0.358	0.975	1.157	0.709	2.157	0.707	0.732	0.964	0.595	0.629	0.746	0.682	1.234	1.06	0.77	0.952	1.952	0.759	1.029	0.855	0.667	0.849	1.848	0.656	0.926	0.752	0.977	1.159	0.711	2.159	0.709	0.734	0.966	0.597	0.631	0.748	0.684	1.236	1.062
CPI-SS034D36D2F	HLA-C_FAM3C	simple:HLAC	simple:Q92520	HLA-C	FAM3C	True	True	False	InnateDB-All	False	0.365	2.372	3.224	2.717	2.442	2.776	2.399	2.834	2.887	2.56	2.634	2.497	2.429	2.784	2.402	2.882	2.375	2.434	2.492	2.545	2.442	2.971	2.464	2.523	2.581	2.634	2.381	2.531	3.066	2.558	2.618	2.676	2.728	2.402	2.475	2.626	3.159	2.652	2.378
CPI-SC0984894BC	TGFB1_TGFbeta	receptor2	simple:P01137	complex:TGFbeta	receptor2	TGFB1	True	False	True	curated	False	0.372	0.99	1.424	1.025	1.304	1.661	0.997	1.212	1.029	1.266	1.132	1.012	1.369	1.102	1.125	1.005	1.362	1.091	0.954	1.525	1.023	1.126	1.405	1.762	1.097	0.993	1.313	1.289	1.169	1.526	1.077	0.994	1.022	1.176	1.038	1.61	1.003	1.033
CPI-SS03FA58286	TNF_VSIR	simple:P01375	simple:Q9H7M9	TNF	VSIR	True	False	True	IMEx,IntAct	False	0.374	1.057	1.167	0.966	1.057	0.888	0.864	1.176	1.385	1.057	1.036	1.154	1.264	1.063	1.154	0.985	0.961	1.273	0.929	1.482	1.154	1.133	0.914	1.024	0.914	1.032	1.242	0.914	0.893	0.969	1.079	0.969	1.087	1.297	0.969	0.948	1.091	1.201	1
CPI-SC0B6D68FD5	ICAM1_aMb2	complex	simple:P05362	complex:aMb2	complex	ICAM1	False	True	False	curated	True	0.379	0.641	0.505	1.018	0.68	0.751	0.614	0.56	1.127	0.59	0.789	0.659	0.522	1.036	0.697	0.741	0.78	0.991	0.891	0.834	0.75	0.805	1.28	1.143	1.089	1.656	1.119	1.318	0.703	0.604	0.992	0.855	0.802	1.369	0.832	1.03	0.677	0.578
CPI-SS0DEDA3567	TNFSF10_RIPK1	simple:P50591	simple:Q13546	TNFSF10	RIPK1	True	False	True	InnateDB-All	False	0.39	0.802	0.774	0.793	0.787	0.76	0.779	0.933	0.905	0.781	0.832	0.925	0.749	0.778	0.785	0.757	0.776	0.862	0.855	1.164	1.136	0.859	0.893	1.011	0.882	1.063	0.944	0.887	1.155	0.98	0.862	0.852	0.91	1.009	1.041	1.014	0.771	0.889	0.941
CPI-SS09C52F54E	LGALS9_SORL1	simple:O00182	simple:Q92673	LGALS9	SORL1	True	False	True	InnateDB-All	False	0.39	0.968	0.74	1.279	0.713	0.924	0.697	1.235	0.715	0.772	1.302	0.846	0.774	0.809	0.879	1.074	1.613	1.047	0.764	0.894	1.206	1.002	1.059	0.852	1.589	1.133	0.992	1.061	0.788	1.096	1.166	0.859	1.361	1.9	1.334	0.943	0.936	1.051	0.891
CPI-SS0898D7F7F	TNFRSF10B_TNFSF10	simple:O14763	simple:P50591	TNFRSF10B	TNFSF10	True	True	False	curated	False	0.392	0.616	0.494	1.391	0.762	0.451	0.471	0.416	1.088	0.579	0.457	1.354	0.726	0.435	1.052	0.652	0.53	1.427	0.798	0.487	0.446	0.507	0.452	1.124	0.493	1.268	0.64	0.965	0.991	0.976	1.122	0.974	1.353	1.231	0.988	0.962	2.127	1.499	1.188
CPI-SS0179FBFD3	TNFRSF10A_TNFSF10	simple:O00220	simple:P50591	TNFRSF10A	TNFSF10	True	True	False	curated	False	0.397	0.526	1.301	0.673	0.998	0.452	0.683	0.561	1.458	0.829	0.518	0.477	0.538	0.48	0.483	1.155	1.042	1.028	1.173	1.025	1.404	1.282	1.039	1.014	2.179	1.55	1.239	1.057	1.199	1.105	1.079	1.259	1.201	1.204	1.876	1.071	0.48	1.255	0.627
CPI-SS06A999D25	PLD2_ARF1	simple:O14939	simple:P84077	PLD2	ARF1	False	False	False	guidetopharmacology.org	False	0.399	0.908	1.043	0.999	1.029	0.918	0.874	0.886	1.162	1.093	1.131	0.895	1.206	0.966	0.923	0.953	1.086	1.017	1.054	1.13	0.961	0.917	0.947	1.081	1.011	1.049	1.124	1.375	1.23	0.927	1.42	1.554	1.51	1.541	1.319	1.311	1.429	1.385	1.368
CPI-SS087321EB5	SELL_SELPLG	simple:P14151	simple:Q14242	SELL	SELPLG	False	False	True	curated	False	0.41	0.87	0.747	0.734	0.776	1.297	1.042	1.325	1.997	0.869	0.981	0.749	1.01	1.116	1.604	0.937	1.079	0.851	1.234	1.042	0.89	1.082	0.959	0.946	0.988	1.509	1.253	1.537	2.209	1.081	1.192	0.961	1.222	1.328	1.816	1.149	1.291	1.063	1.446
CPI-SS09C4FCB90	ICAM1_SPN	simple:P05362	simple:P16150	ICAM1	SPN	False	True	False	curated	False	0.429	1.004	1.014	0.827	0.928	1.113	1.123	0.936	1.037	1.022	1.032	0.845	0.945	1.117	0.901	0.786	1.059	1.642	1.175	1.652	0.906	1.466	1.244	1.212	1.193	1.566	1.213	0.991	0.855	0.767	0.823	0.763	0.829	0.771	1.355	0.887	1.365	1.178	0.957
CPI-SS0E23CEB91	LGALS9_HAVCR2	simple:O00182	simple:Q8TDQ0	LGALS9	HAVCR2	True	False	True	curated	False	0.433	0.839	1.072	0.914	1.114	0.979	1.046	0.796	1.029	0.871	1.071	0.936	1.002	1.174	0.851	0.894	1.406	1.249	1.448	0.955	1.314	1.38	0.766	0.999	0.841	1.041	0.906	0.973	0.866	0.936	1.461	1.138	0.84	0.816	0.846	0.874	1.181	0.807	1.693
CPI-SS002DF6C31	LGALS9_SLC1A5	simple:O00182	simple:Q15758	LGALS9	SLC1A5	True	False	True	I2D,InnateDB-All	False	0.438	1.124	0.661	0.642	0.602	1.08	0.618	0.752	0.597	0.599	0.776	1.458	0.786	0.758	0.995	0.976	0.936	0.892	0.656	0.807	0.688	0.649	0.646	1.051	1.039	0.884	0.886	1.062	1.745	1.073	1.045	1.282	0.861	1.263	1.223	1.179	0.943	1.094	0.975
CPI-SS02ACCF1F7	MIF_TNFRSF14	simple:P14174	simple:Q92956	MIF	TNFRSF14	True	False	True	I2D,IntAct	False	0.447	1.295	1.377	1.345	1.569	1.37	1.384	1.385	1.496	1.35	1.267	1.349	1.317	1.541	1.342	1.357	1.357	1.468	1.323	1.614	1.696	1.664	1.54	1.888	1.467	1.429	1.312	1.42	1.419	1.689	1.704	1.491	1.705	1.816	1.321	1.67	1.519	1.606	1.688
CPI-SC0A9458008	ICAM1_aXb2	complex	simple:P05362	complex:aXb2	complex	ICAM1	False	True	False	curated	True	0.449	0.711	0.781	1.309	1.109	1.09	0.843	1.425	0.82	0.891	0.744	1.418	1.218	1.199	0.952	1.534	0.728	0.799	1.327	1.126	1.108	0.86	1.443	0.968	0.849	1.349	1.42	0.84	1.004	0.782	0.773	0.829	1.273	1.947	1.747	1.728	1.481	2.063
CPI-SS055E061C9	LAMP1_FAM3C	simple:P11279	simple:Q92520	LAMP1	FAM3C	True	True	False	InnateDB-All	False	0.449	1.75	1.243	1.302	1.36	1.413	1.086	1.16	1.31	1.454	1.116	1.675	1.168	1.227	1.285	1.338	1.235	1.591	1.143	1.201	1.253	1.151	1.275	1.85	1.343	1.402	1.46	1.513	1.186	1.26	1.123	1.41	1.787	1.279	1.339	1.397	1.449	1.123	1.197
CPI-SS09808DEAE	CD74_APP	simple:P04233	simple:P05067	CD74	APP	False	True	False	curated	False	0.449	1.685	1.766	3.154	1.671	1.866	1.905	1.859	1.578	1.85	2.629	2.274	2.583	2.664	2.2	2.305	4.052	2.272	2.208	2.569	2.305	2.213	2.764	2.803	2.757	2.476	2.748	2.276	2.632	2.941	3.022	2.559	2.663	4.41	2.631	2.566	2.927	2.663	2.571
CPI-SS014958F32	LGALS9_CD47	simple:O00182	simple:Q08722	LGALS9	CD47	True	False	True	InnateDB-All	False	0.463	0.989	1.164	1.09	1.236	1.121	1.046	1.193	1.077	1.323	1.072	1.499	1.129	1.424	1.005	1.144	1.032	1.206	1.571	1.092	1.076	1.188	1.17	1.091	1.016	1.163	1.364	1.101	1.61	1.358	1.786	1.415	1.711	1.011	1.074	1.292	1.431	1.319	1.493
CPI-SS0D4C221B8	ICAM1_AREG	simple:P05362	simple:P15514	ICAM1	AREG	True	True	False	InnateDB-All	False	0.476	1.247	2.715	1.809	1.38	1.322	1.101	1.187	1.356	2.824	1.918	1.489	1.431	1.21	0.942	1.296	1.264	2.733	1.827	1.397	1.34	1.118	1.205	0.97	1.46	1.337	1.885	3.353	2.447	2.018	0.993	1.002	1.961	1.739	1.341	1.471	1.825	1.173	1.049
CPI-SS0302E8E8F	CD74_COPA	simple:P04233	simple:P53621	CD74	COPA	True	True	False	IMEx,IntAct	False	0.485	1.843	2.018	1.946	1.87	1.927	2.191	2.023	1.839	1.858	1.874	1.849	2.047	1.853	2.074	1.952	2.741	2.619	2.916	2.249	2.844	2.768	2.825	3.09	2.554	2.493	2.921	2.737	2.756	2.697	2.772	2.748	2.945	2.751	2.972	2.71	2.85	3.099	2.977
CPI-SS0C4E86714	TNFRSF1B_GRN	simple:P20333	simple:P28799	TNFRSF1B	GRN	True	True	False	IMEx,InnateDB-All,MINT	False	0.485	1.485	1.375	1.968	1.79	1.508	1.949	2.091	1.949	2.086	1.882	1.624	1.447	1.605	1.748	1.606	1.742	1.538	1.448	1.27	1.429	1.571	1.429	1.566	1.362	1.357	1.839	1.661	1.379	1.82	1.962	1.82	1.957	1.753	1.48	1.302	1.461	1.603	1.461
CPI-SC0E9C058EB	PLAUR_a4b1	complex	simple:Q03405	complex:a4b1	complex	PLAUR	True	True	False	curated	True	0.49	1.08	1.067	1.478	1.17	1.114	1.019	1.123	1.144	1.295	1.291	1.108	1.987	1.769	1.93	1.624	2.401	2.388	2.799	1.767	1.872	1.838	2.491	2.186	1.897	2.435	2.34	1.833	2.444	2.465	2.295	2.246	2.616	1.251	1.033	1.193	1.664	1.651
CPI-SS0ABC5C1B8	CD74_MIF	simple:P04233	simple:P14174	CD74	MIF	True	True	False	I2D,InnateDB-All	False	0.494	1.924	1.897	2.244	2.236	2.097	1.978	2.317	1.918	2.038	2.137	2.001	1.962	1.951	1.914	2.822	2.32	2.795	2.231	3.142	3.134	2.996	2.652	2.876	2.691	3.216	2.816	2.936	3.035	2.676	2.899	2.86	2.849	2.525	2.589	2.812	3.181	2.678	3.153
CPI-SS0BD9F32BA	LGALS9_DAG1	simple:O00182	simple:Q14118	LGALS9	DAG1	True	False	True	InnateDB-All	False	0.499	0.57	0.614	0.597	1	0.527	0.571	0.554	0.956	0.651	0.51	0.751	0.575	0.904	0.644	0.7	0.776	0.948	0.932	0.573	0.614	0.65	0.665	0.569	0.571	0.769	1.334	0.508	0.541	0.926	0.938	0.797	1.038	0.862	1.191	0.931	0.987	1.063	1.235
CPI-SS0DA033F03	TNFRSF1A_GRN	simple:P19438	simple:P28799	TNFRSF1A	GRN	True	True	False	IMEx,InnateDB-All,MINT	False	0.501	0.674	1.157	0.979	1.137	1.28	1.138	1.274	1.07	0.697	1.18	1.002	0.719	1.161	1.303	1.161	1.297	1.093	0.688	1.095	0.985	1.578	0.872	0.751	1.4	1.117	0.794	0.703	1.559	1.701	1.559	1.696	1.492	1.071	0.962	1.554	0.849	0.727	1.376
CPI-SS0703338F5	LGALS9_CD44	simple:O00182	simple:P16070	LGALS9	CD44	True	False	True	InnateDB	False	0.517	1.417	1.489	1.583	1.388	1.407	1.402	1.342	1.624	1.374	1.446	1.539	1.344	1.364	1.359	1.581	1.516	1.373	1.751	1.823	1.917	1.601	1.722	1.575	1.742	1.648	1.737	1.676	1.958	1.416	1.509	1.551	1.803	1.66	1.638	1.457	1.414	1.561	2.038
CPI-SC0A199B69E	COL10A1_a10b1	complex	simple:Q03692	complex:a10b1	complex	COL10A1	True	False	False	curated	True	1.517
CPI-SS0BA87E94E	GFRAL_GDF15	simple:Q6UXV0	simple:Q99988	GFRAL	GDF15	True	True	False	guidetopharmacology.org	False	1.517
CPI-SC0DF986F22	COL10A1_a11b1	complex	simple:Q03692	complex:a11b1	complex	COL10A1	True	False	False	curated	True	1.517
CPI-SC01115AAD1	COL10A1_a1b1	complex	simple:Q03692	complex:a1b1	complex	COL10A1	True	False	False	curated	True	1.517
CPI-SC03C093767	COL10A1_a2b1	complex	simple:Q03692	complex:a2b1	complex	COL10A1	True	False	False	curated	True	1.517
CPI-SS00BBA318F	TEK_ANGPT4	simple:Q02763	simple:Q9Y264	TEK	ANGPT4	True	True	False	curated	False	1.517
[truncated: 403 more columns]

## Sheet: SCENIC results
SCENIC transcription factor analysis, related to Figure 2K
	0	1	10	11	12	13	14	15	16	17	2	3	4	5	6	7	8	9	ClusterNum
POLR3A (698g)	-1.57786	-1.55833	-1.00007	0.845539	0.0393159	-0.992494	-0.21191	1.24651	0.103804	-0.705672	-0.513578	-0.752992	0.997917	0.609838	1.63067	0.0934206	1.53721	0.208681	4
CTCF_extended (2257g)	-1.75794	-1.22867	-1.1203	0.340428	-0.202217	-0.862749	1.03779	0.211371	-0.411278	-0.540305	-0.253895	-1.03413	2.0083	0.351336	0.947117	0.855051	1.2569	0.403186	9
UBTF_extended (2098g)	-1.8532	-1.3153	-0.36921	0.321056	0.141195	-1.79733	0.656329	0.557432	0.758386	-0.702421	-0.340216	-0.0578094	1.24963	0.636653	0.0789575	-0.63987	1.81455	0.861165	9
ZNF121 (368g)	-1.89458	0.176503	-1.26196	0.282863	-0.307919	0.306584	-0.932132	2.59197	0.336738	0.474816	0.256419	-0.510686	0.759833	0.0109002	0.49486	-0.984582	-0.752345	0.95272	10
TBP (265g)	-2.11887	-0.482567	-1.37425	-0.439968	-0.0827926	-0.07031	-1.35606	1.4495	0.32376	-0.574421	0.22013	0.349336	-0.0245633	0.707539	1.72229	-0.137714	1.37332	0.515643	4
E2F4 (19g)	0.061246	0.612266	-0.871629	0.0516153	0.759409	-1.09897	0.298548	-0.799184	-0.464285	0.508278	0.503692	0.324488	0.0402183	-1.04489	-1.05228	-1.59024	2.47624	1.28548	6
MAZ_extended (1664g)	-0.117755	0.609493	-1.16252	0.280276	0.00245215	-1.8145	0.0659437	-0.770239	-0.424641	1.06453	1.09794	-0.261598	0.112878	-1.45924	-0.327637	0.290658	2.50562	0.308333	6
ATF1_extended (1017g)	0.577664	1.20485	-0.0537823	-0.68605	0.545549	-1.78433	-1.35479	-1.17147	0.0166822	-0.0531151	1.10636	1.1144	-1.24917	-0.792089	0.707352	-0.0253825	1.68828	0.209045	6
SMARCB1_extended (171g)	-0.338671	0.466484	0.507625	-0.328507	0.869327	-1.34859	-0.521242	-1.39797	0.0456851	0.349167	1.14307	1.47666	-1.5422	-1.00288	-0.770125	0.0519133	1.93569	0.404565	6
TCF3_extended (96g)	-1.65432	0.0801681	-0.278055	0.114717	0.39608	-0.722967	-0.788086	0.21625	0.854594	0.301916	0.447227	1.00194	-0.380898	-0.385286	-0.916595	-1.81062	2.05559	1.46835	18
CEBPZ_extended (24g)	-1.95645	0.249649	0.814709	-0.685343	-0.0579188	-1.46711	-0.61819	0.0361908	1.20595	-0.0125499	0.625707	1.5165	0.82904	0.0647274	-1.01407	-1.27842	0.420813	1.32676	18
POLE3 (981g)	-1.0669	-0.494469	0.0933561	0.13835	0.296505	-1.01097	-0.0745281	-0.313442	0.338381	-0.270141	0.0802166	0.558645	-0.722942	-0.248713	-0.559938	-0.69564	3.50543	0.446795	6
HDAC2_extended (2333g)	-1.31438	-0.284708	-0.804329	0.140276	0.268789	-2.37463	0.624685	-0.0335533	0.13478	0.0618387	0.48344	0.225909	0.955451	-0.533986	-0.0393565	-0.935657	2.00743	1.418	9
THAP11 (274g)	-2.43072	-0.340482	-1.12468	0.06664	0.79901	-1.46621	0.270699	0.100115	-0.308487	0.387268	1.08025	-0.112682	-0.229877	-0.559517	0.456918	0.474007	1.08446	1.85328	9
AHR (14g)	-0.71085	0.626253	1.21737	-1.15755	0.201796	2.00591	-1.97345	-0.504015	0.910794	0.00372486	-0.171462	1.05468	-0.812678	1.0436	-0.333761	-1.08772	-0.115262	-0.197389	12
CREB5_extended (46g)	-0.176334	-0.362754	2.32029	-0.855924	0.206999	0.97814	-1.57895	-0.342535	1.31288	-0.717408	-0.479784	1.18714	-0.781921	0.665536	-0.909082	-1.04481	0.0731537	0.505364	12
TAF7_extended (592g)	-0.817868	0.199119	1.58527	-1.37847	0.54817	0.690301	-2.14876	-0.137818	1.21956	-0.192972	0.13	1.26941	-1.0573	0.564199	-0.816702	-0.524908	-0.0928874	0.961658	12
TGIF1 (429g)	-0.301793	0.374623	1.64073	-1.14869	0.0375554	1.37456	-1.82108	-0.791033	1.06247	-0.239429	0.212059	1.44674	-0.671224	0.638205	-1.22153	-0.971468	-0.152628	0.531931	12
BCL3 (340g)	0.234775	-0.0439265	3.09543	-0.897027	0.566598	0.753598	-1.45143	-0.875518	-0.0382472	-0.088183	-0.0521591	0.671387	-0.368626	-0.258423	-0.662573	0.671116	-0.154105	-1.1027	12
ETV6_extended (581g)	-0.483594	-0.0464976	2.24918	-0.762839	1.36343	0.00646346	-1.76533	-0.902599	0.959962	-0.306937	0.338187	1.57638	-0.95445	0.116516	-0.481673	0.0307584	-0.221837	-0.715121	12
IRF9_extended (235g)	-0.419088	0.168065	1.91414	-0.961452	0.157911	0.911422	-2.01909	-0.568973	0.243676	-0.022564	0.312235	1.94039	-1.39616	0.163919	-0.659617	0.328589	0.456141	-0.54954	12
TGIF2 (79g)	-0.126529	-0.0343566	2.46644	-0.717186	1.0485	1.65024	-1.6285	0.0031752	-0.0490219	-0.103884	-0.441924	0.755254	-1.03796	-0.184807	-0.575432	-0.180166	0.384434	-1.22827	12
CHD2 (14g)	0.205501	0.324706	1.65793	-1.27467	0.133572	1.97447	-2.32069	-0.575503	0.24326	0.034635	0.141675	1.0711	-1.09087	0.364744	-0.198388	-0.0584495	-0.155595	-0.477432	12
POLR2A (1033g)	-0.670261	0.618884	0.802195	-1.49601	-0.17381	0.716973	-2.40085	-0.609918	0.921613	0.719469	1.00915	1.03677	-0.0321605	-0.115774	-1.22064	1.1999	-0.430894	0.125362	14
CREB3 (594g)	-0.738924	0.647017	1.45677	-0.708068	1.0973	-0.832492	-1.11786	-0.928039	0.604086	0.310442	0.730871	1.65102	-1.00332	-0.65802	-1.6254	-0.427735	0.433118	1.10922	11
SATB1 (10g)	-0.935385	-0.13787	1.38324	-0.528671	0.342833	-0.628561	-1.16021	-0.110365	1.86814	0.0243809	0.695857	2.22674	-1.11528	-0.43986	-1.03816	-0.641677	-0.18836	0.383214	11
VDR (10g)	-0.433808	0.341599	1.33434	-0.200829	-0.253517	-0.0390522	-0.914341	-0.989414	2.24073	-0.0113248	0.710493	1.952	-1.02416	-0.261881	-1.39319	-0.679506	-0.00770538	-0.370435	11
PPARD (26g)	-0.393971	0.706809	1.37123	-0.689486	-0.238207	-0.0430742	-1.17148	-0.954701	1.60903	0.36069	0.7533	1.74678	-0.0427867	-0.215962	-1.6466	-1.4012	-0.401987	0.651611	11
CREM (945g)	-0.390108	0.735799	1.60478	-0.898919	-0.0404911	-0.0365098	-1.34765	-0.920757	1.27244	0.0924955	0.582112	1.85854	-0.615229	0.0555249	-1.7255	-0.928702	-0.0775486	0.779738	11
RUNX3 (49g)	-0.960319	-0.242901	1.6057	-0.329751	1.01784	-0.512367	-1.17505	-0.40082	-0.203736	0.0857932	0.410344	1.35628	-1.24569	-0.739152	-0.146614	2.30529	0.162439	-0.987288	14
SMAD3 (78g)	-0.331197	0.851202	1.85557	-0.490639	1.20287	0.998509	-1.32306	-0.875561	-0.915501	0.641095	0.453412	0.390926	-1.17186	-0.931123	-0.688576	1.56157	-0.55514	-0.672505	14
RELB (639g)	-0.710748	0.425367	1.96382	-0.633682	1.95838	0.136013	-1.27716	-1.13383	-0.354683	0.38635	0.618666	0.202649	-0.711176	-0.818418	-0.911792	1.14467	-0.926035	0.641605	14
NFYB_extended (112g)	-1.35604	-0.996739	-0.58324	0.485714	-0.0752552	0.188626	-0.224661	2.17232	-0.401033	-0.609211	-0.576436	-0.204538	-0.532694	0.411704	0.358084	-0.851027	2.55148	0.242948	4
ZNF551 (14g)	-1.78285	-1.15995	0.639311	0.340832	-0.302633	-0.296733	-0.209547	0.534886	2.30089	-0.401803	-0.674214	0.691065	-0.743872	0.712054	-0.423851	-1.2931	1.04526	1.02426	9
RFXAP (15g)	-0.929861	-1.2074	-0.362733	0.191802	0.189331	1.19898	-0.084675	0.47564	-0.319019	-0.946508	-0.957375	0.574035	-0.353331	1.07972	0.39653	-0.857969	2.76545	-0.852622	4
CLOCK_extended (79g)	-1.97337	-1.59213	0.492984	-0.303593	0.324635	-0.660502	-0.195869	0.753953	1.12017	-0.987852	-0.912503	0.142065	0.96714	2.0363	0.757239	-0.386928	-0.0267901	0.445046	9
ZNF568 (45g)	-1.48547	-1.52952	0.699011	0.306819	0.726845	-0.0526216	-0.661541	1.60448	1.01354	-1.02142	-1.10931	0.141152	-0.873238	1.75993	0.450158	-0.597149	0.756061	-0.127728	9
ZNF606 (14g)	-0.954164	-0.995317	-0.438471	0.0067473	0.155198	1.89561	-1.00231	2.35298	0.0271302	-0.604459	-0.905963	-0.19495	-0.444911	0.926307	1.03358	-0.588474	-0.847192	0.578661	10
ZNF808 (29g)	-1.29951	-0.903973	0.197279	0.118585	-0.511565	2.04333	-0.547988	1.58281	0.392003	-1.04821	-0.760586	-0.196724	-0.239008	1.81052	0.889837	-0.828812	-0.717513	0.0195273	10
ZNF780B (12g)	-0.354622	-0.866502	-0.36219	0.409279	-0.678486	1.37591	-0.30332	2.21449	0.350203	-0.924791	-1.07092	-0.594836	0.317476	1.97903	0.508757	-1.17095	-0.469813	-0.358707	10
TCFL5 (23g)	-0.610068	-1.73025	-0.907468	1.03754	0.0569099	-0.717903	0.458976	1.41415	0.710053	-0.948732	-1.19272	-0.65146	0.175059	1.46182	1.43667	-0.772431	0.94732	-0.167457	4
ZNF366 (12g)	-0.552023	-0.688524	-0.678307	0.246588	0.108687	-0.410415	0.766857	3.41507	-0.273969	-0.582684	-0.694435	-0.6145	-0.269082	0.843137	0.692977	-0.75388	-0.211704	-0.343792	4
TBL1XR1_extended (13g)	0.400272	-1.17427	0.0273158	-0.68371	0.692953	-0.823906	-1.78976	-0.208775	1.10147	-0.191902	0.194147	0.269004	-0.15779	0.69708	1.6835	1.87264	-0.427742	-1.48053	17
RFX7 (18g)	-0.273532	-1.23388	0.0206961	-0.562055	-0.00020719	-0.463512	-1.16116	1.74299	-0.445086	-0.522436	-0.460813	-0.290545	0.280846	1.54356	2.21836	0.996491	-0.261142	-1.12857	17
RFX3 (31g)	-0.606643	-0.790679	0.059141	0.388329	0.317558	-0.154745	-0.489687	3.57032	-0.466434	-0.366489	-0.558405	-0.161702	-0.780404	0.514413	0.673435	-0.0315018	-0.335303	-0.78121	4
BRF1_extended (1264g)	-0.659363	-1.21569	-0.0520118	-0.183993	-0.0558592	0.753087	-1.58915	0.436601	0.151684	-0.577648	-0.223851	-0.07762	-1.29926	0.922083	1.57251	2.18306	0.844057	-0.928642	17
USF1_extended (246g)	0.320679	-1.05823	-0.795009	-0.273264	-0.137212	1.74695	-1.12207	0.870781	-0.351135	-0.181234	-0.706908	-0.373088	-0.54419	1.11626	2.41098	0.532465	-0.233176	-1.22259	17
PBX3 (756g)	-0.967436	-1.41549	0.812421	-0.1462	0.0661273	-0.953665	-0.410979	-0.0946118	1.00097	-0.976247	-0.764817	0.360887	-0.144368	1.21859	0.143061	-0.764537	2.72165	0.314635	9
MXD4_extended (19g)	-1.49979	-1.59914	0.791469	-0.330416	0.582575	-1.3223	-0.185828	1.70316	1.3105	-0.877742	-0.66423	0.601225	-0.45475	1.33479	-0.152954	0.417948	-0.497299	0.842782	16
BBX_extended (23g)	-1.15011	-1.32187	1.8733	-0.581754	0.56202	-1.00012	-0.398071	-0.605737	0.796922	-1.09273	-0.494032	1.28343	0.252013	1.4229	0.192317	0.782053	0.647508	-1.16804	9
TBX19_extended (91g)	-1.68186	-1.97524	0.899164	-0.257203	0.832823	-0.897928	0.0917135	0.92223	0.219355	-1.16163	-0.914319	0.307352	1.26796	1.60068	0.475362	0.15022	0.436559	-0.315235	9
ZNF362 (305g)	-1.02034	-1.71282	0.906486	0.0292769	-0.199521	-1.22975	0.743229	-0.0403411	0.769549	-1.21407	-0.934593	-0.00437113	1.26139	2.07634	0.917194	0.0739382	0.188531	-0.610146	9
TFAP4_extended (14g)	-1.43244	-1.39163	0.383598	0.162358	1.19032	-0.0585507	-0.787139	-0.469702	1.2346	-0.814735	-0.487516	0.501151	-1.50861	1.81271	0.747495	-0.224076	1.30511	-0.162942	9
CREB3L4_extended (11g)	-0.966453	-1.02423	0.0177657	-0.0818432	0.85418	-0.938692	0.220259	0.228274	0.637647	-0.87866	-0.84649	0.0437618	-0.75312	1.16235	-0.462184	-1.04553	2.56093	1.27204	9
ESRRA (11g)	-0.678856	-0.463979	-0.740743	-0.180113	0.0274524	-0.513178	0.458979	-0.942189	0.356922	0.736677	0.929917	-0.449652	-0.045933	-0.560178	0.601311	3.21486	-1.09576	-0.655535	1
STAT5A (82g)	-0.0140506	-0.873294	0.801732	-0.357848	0.900123	-0.852713	-0.496108	-0.149227	-0.810638	0.401384	0.393242	-0.785044	0.527521	-0.578309	1.37922	2.65012	-0.713203	-1.42291	15
MLX (879g)	-0.812615	-0.0286748	-0.831451	-0.357437	0.253102	-0.856917	0.515775	-1.30502	-0.990373	0.423589	0.983904	-0.375175	1.24468	-0.594781	0.502447	2.44395	-1.18726	0.972257	15
TP53_extended (328g)	-1.19013	-0.683491	-0.0759298	0.099115	0.453016	-2.24692	0.551152	-0.789478	-0.27082	0.0699742	0.692518	0.382733	0.684698	-0.495858	-0.0786927	0.312349	2.71662	-0.130855	6
CREB1_extended (1173g)	-0.928414	-0.684524	0.480879	-0.723541	0.638966	-2.60682	0.160705	-1.37528	-0.237565	-0.441067	0.601591	0.162329	1.52717	0.602572	0.418082	1.26904	0.687833	0.44804	9
NFYC (595g)	-0.0739679	-0.670654	-0.450727	0.103737	-0.0615173	-1.3932	-0.0451738	-1.2175	-0.73694	-0.245602	0.538977	-0.0532973	-0.256678	-0.358272	1.09629	2.0284	2.46034	-0.664213	17
IRF7 (451g)	0.0734598	0.288939	1.24012	-0.259026	1.66576	-0.0350119	0.456138	-2.13758	-0.972206	-0.826292	0.296007	0.346594	1.01084	-0.189756	-0.309546	1.43152	-0.515033	-1.56493	6
ETV7_extended (191g)	-0.570014	-0.653721	1.34136	0.000852703	2.72908	-0.673441	0.954966	-1.1378	-0.614968	-1.15554	-0.33817	-0.0696524	1.16489	0.312806	-0.213338	0.0551047	-0.14	-0.992423	6
STAT1 (564g)	-0.750378	-0.549343	1.52825	-0.0947332	2.12199	-1.41719	0.8512	-1.58702	-0.249706	-0.921588	0.128005	0.367784	1.4069	0.205822	-0.403848	0.402048	-0.310018	-0.728186	6
TLX1_extended (81g)	-0.229067	-0.367148	-0.392697	-0.252132	-0.430672	-0.46176	2.79524	0.128994	-0.578115	-0.464209	-0.431647	-0.6138	2.56923	-0.136065	-0.181878	0.124699	-0.579661	-0.499321	2
STAT2 (752g)	0.0998381	-0.329125	-0.0481939	-0.00530483	0.68503	-0.818519	1.895	-0.915014	-0.782152	-0.485395	-0.0055133	-0.719351	2.53025	-0.200932	0.223275	1.0473	-1.10415	-1.06704	2
IRF2 (1046g)	0.168385	-0.35253	-0.348662	0.0620009	0.606099	-0.10861	0.654887	-1.0224	-1.28788	-0.463668	0.134619	-0.945444	1.10068	-0.0102458	1.53615	2.46918	-1.17097	-1.02159	15
IRF5 (162g)	0.254488	0.217283	-0.892575	-0.0699574	0.00742414	0.414509	0.979021	-1.01621	-1.17079	-0.285996	0.0338815	-1.3079	2.51844	-0.0804284	1.37362	0.762184	-1.33421	-0.402788	2
KLF11_extended (141g)	-0.449337	0.23392	-0.49003	-0.40873	-0.255152	1.19914	-0.672069	-0.518328	-0.83588	0.925652	0.537446	-0.658956	-0.0165884	-0.567116	0.597302	3.08874	-1.13175	-0.578261	1
PLAGL2 (26g)	0.0908809	0.234969	0.67854	-0.29103	0.237427	0.453207	-0.685605	-0.865416	-1.05847	0.479024	0.512875	-0.371352	-0.310131	-0.812403	0.407239	3.22035	-0.85095	-1.06916	1
POU2F2 (57g)	-0.298492	-0.176799	0.22243	-0.174911	0.195986	0.49728	-0.592815	-0.588584	-0.822178	0.196202	0.238229	-0.494287	-0.165725	-0.548223	0.725064	3.52205	-0.732705	-1.00252	1
XRCC4_extended (1383g)	0.88958	0.0641342	-0.244497	0.21904	-0.261729	0.507083	-0.894953	-1.17319	-0.624808	-0.153781	0.379432	0.11053	-1.74657	-0.534183	0.859876	1.47556	2.31558	-1.18709	17
SPI1 (899g)	0.531083	0.962126	0.319493	-0.475785	0.272092	-0.391893	-0.086986	-2.05625	-1.11203	0.749907	1.05162	0.12237	-0.244219	-1.14326	0.24455	2.43301	-0.44084	-0.734995	1
ZNF91 (17g)	1.69725	-0.301817	0.587554	0.327987	-0.829322	-1.00445	-0.788916	1.85012	1.33944	0.0397288	-0.495821	1.28356	-0.673475	0.329918	-0.179513	-1.27101	-1.18785	-0.723381	13
ZNF281_extended (23g)	2.54285	1.3373	-0.838298	0.125704	-0.554361	0.9046	-0.912312	-0.0610659	-0.900354	0.809073	0.69262	-0.750583	-0.859152	-0.828636	0.266374	0.725625	-1.06276	-0.636623	5
NFIL3 (285g)	2.7444	1.20823	-0.723448	-0.0871377	-0.736218	1.32171	-1.0332	-0.469168	-0.507574	0.601552	0.403835	-0.56637	0.0513521	-0.464634	0.202361	0.181178	-1.41232	-0.714555	5
HOXA5 (12g)	2.39782	0.0137721	-0.473156	-0.304858	-0.715625	0.93547	-0.480732	2.46041	-0.264566	0.305937	-0.319877	-0.443477	-0.767347	-0.367705	0.331225	-0.427052	-1.02725	-0.852985	13
NRF1 (338g)	0.444452	1.17729	-1.12021	-0.485607	-0.176897	1.87175	-2.0585	1.4238	0.183256	1.04235	0.541513	-0.222397	-0.846594	-0.626026	0.309371	-0.151705	-1.19313	-0.112713	10
SIN3A (376g)	0.0926505	0.309291	0.746324	-1.03689	0.125442	1.38643	-2.84084	0.562156	0.364557	0.287972	0.406673	0.507422	-1.52635	0.158739	0.11151	0.587647	0.761371	-1.00411	14
BDP1_extended (99g)	-0.606812	0.347534	-0.479952	-0.6436	-0.658014	0.563178	-2.40023	2.32585	1.40404	0.508153	0.452007	0.21098	-0.684028	0.308867	0.528625	-0.533099	-0.579893	-0.063606	10
BCLAF1 (95g)	0.783343	0.994931	-0.239011	-1.05948	-0.543685	1.35482	-2.57504	1.00913	0.478386	0.996476	0.566064	0.671675	-1.27584	-0.282071	0.166072	0.119895	-0.667889	-0.497779	10
NEUROD2_extended (43g)	0.239758	0.341813	-0.744418	-0.216358	-0.210441	2.14696	-0.577581	2.46501	-0.866801	-0.0923704	-0.511649	-0.82164	0.745714	0.210103	0.435079	-1.23799	-1.03367	-0.271521	10
NR6A1_extended (20g)	0.0093257	-0.229664	-0.645731	0.611411	3.22079	1.19977	-0.950947	0.0427655	-0.405659	0.190249	-0.134961	-0.707776	0.487518	-0.411785	0.0855708	-0.916152	-1.18054	-0.264188	6
ZNF426 (17g)	-0.514775	-0.616693	-1.35497	-0.0836001	-0.326175	0.468387	-0.109903	1.15184	1.28398	0.388959	-0.0573925	-0.290756	-1.26597	1.83865	0.281918	0.18104	-2.12876	1.15423	10
ZFX_extended (594g)	0.804118	0.959825	-0.0604998	-0.84863	-0.349333	1.59896	-2.3217	0.441824	0.0297522	1.17062	0.638689	-0.295992	-0.468186	-0.0835785	0.506964	0.398783	-1.97854	-0.143076	10
ZBTB33 (506g)	-0.0481291	0.166864	-0.809736	-0.174632	0.133189	1.57109	-1.75191	1.2617	-0.699246	0.647558	-0.0660354	-0.493161	-1.27703	-0.369405	1.80159	1.37772	-0.997559	-0.272883	1
ZNF384_extended (14g)	0.276663	0.135739	-1.53332	-0.163509	-0.367805	1.68833	-1.08438	1.13455	-0.965351	0.910534	0.250371	-0.914272	-0.266122	0.220664	1.78036	0.957999	-1.24133	-0.819128	1
TAF1 (1333g)	1.35757	0.495827	-0.653748	-0.265371	-0.665462	0.535206	-2.32481	0.874314	0.123502	0.579515	0.55022	-0.135114	-1.05231	0.154252	1.77114	0.69109	-0.90658	-1.12924	13
NR3C1 (217g)	0.595746	0.832129	0.571872	-1.68276	-0.159572	0.54745	-2.40035	-1.02981	0.519027	0.0985496	0.847886	0.554752	0.708656	0.107439	-0.033649	1.49229	-1.21328	-0.356375	14
STAT3 (12g)	0.925132	0.709638	0.194521	-1.86046	0.0730694	0.0474862	-2.25607	-0.228264	0.947968	0.0736382	0.711631	1.00976	0.918245	0.294828	-0.00314877	-0.0433609	-1.87147	0.356858	11
ATF6 (233g)	0.673886	0.862802	0.39676	-1.33911	-0.288505	-0.899384	-1.73601	-0.0908508	1.25776	0.661136	0.876064	0.210346	1.58906	0.484737	-0.582134	-0.764152	-1.78797	0.475568	11
HDAC6 (400g)	-0.61141	-0.698132	-0.615627	-0.831794	0.406976	1.37019	-2.13506	2.01105	0.645483	0.348672	0.1258	-0.52614	0.160779	0.28384	0.0158457	1.47316	-1.09976	-0.32387	10
ZNF440 (59g)	-0.609851	0.120852	-1.12457	0.00914178	-0.400647	1.20033	-1.23922	1.91051	1.13396	1.18632	0.03801	-0.977731	0.336267	0.626626	0.182509	-0.779234	-1.91648	0.303205	10
RFX1 (94g)	-0.654672	-0.181727	-0.76598	-0.584761	-0.71063	2.97185	-0.572209	0.909796	-0.969081	0.506223	-0.471179	-0.374075	1.57314	0.190017	-0.205267	0.448324	-0.863566	-0.246199	8
ZNF555 (40g)	-1.35166	-0.60455	0.00677083	-0.676816	-0.0512603	2.23308	-1.52248	1.64299	0.269842	0.236104	-0.537121	-0.330929	-0.412076	0.5464	1.32852	0.267473	-1.21714	0.172854	10
ZC3H11A_extended (13g)	-0.326816	0.603824	0.0999427	-0.0158235	-0.0977939	3.07623	-1.09984	-0.392795	-0.646065	0.982487	0.219171	-0.693391	-0.515907	-0.519216	0.0354927	1.11169	-1.32226	-0.498933	1
ZNF274 (14g)	-1.35691	-0.692916	0.0310572	-0.826075	-0.264036	1.8623	-0.733713	0.000600407	-0.111977	-0.592187	-0.598099	-0.387399	0.902035	1.68766	-0.388895	-0.558528	-0.184049	2.21114	8
HIC1_extended (164g)	-1.72247	0.0288753	0.0918213	-0.759701	-0.0459234	0.131324	-0.0417951	-0.730496	-0.426036	0.684716	0.883862	-0.17318	1.5544	-0.426905	-0.612871	2.14335	-1.64868	1.06971	15
FOXO1 (103g)	-1.49862	-0.515859	-0.32378	-0.777611	-0.0093687	0.036362	-0.259866	1.92677	-0.41868	0.335937	0.212275	-0.404857	1.30287	-0.379412	-0.629658	1.60729	-1.62799	1.4242	15
THRA_extended (46g)	-0.938595	0.573856	-0.559289	-0.583805	-0.40341	0.0724294	-0.0832026	-0.462226	0.172883	0.628756	0.686006	-0.578239	0.477793	-0.248442	-0.756024	0.757703	-1.75592	2.99973	11
MITF (193g)	-1.17293	0.260556	0.014614	-0.480457	0.222194	-0.47651	0.37273	-0.718859	0.0248593	0.286615	0.373066	-0.0740465	1.12325	0.0149597	-0.984228	-0.841174	-1.10718	3.16255	11
RREB1_extended (173g)	-1.17456	0.721332	-0.0665384	-0.481697	-0.139142	0.0121742	-0.538972	-0.217564	0.351812	0.692703	0.616507	0.429788	0.424494	-0.207825	-1.23279	-1.0551	-1.15796	3.02334	11
ZMIZ1 (155g)	-1.3331	1.03254	0.425092	-0.479983	0.251327	0.281161	-1.00331	-0.58272	0.433161	1.07173	0.973138	0.335633	-0.612769	-0.609786	-1.1586	-0.146937	-1.32495	2.44838	11
USF2 (1314g)	-0.133087	1.2527	-0.164416	-0.903235	0.179429	-1.09048	-0.39448	-1.48921	-0.0184812	0.954348	1.35289	0.0473681	0.0548521	-0.651664	-0.685534	0.588285	-1.23602	2.33674	11
MXI1 (267g)	0.0439711	2.07057	-0.755604	-0.293945	0.0874961	0.390493	-1.37398	-0.69752	-0.547584	1.01945	1.32203	-0.452223	-0.993349	-0.392204	0.13832	1.43969	-1.61849	0.612882	5
ZNF219 (53g)	0.0942942	1.06404	-0.935152	-0.0849659	-0.436076	0.459202	-0.112908	0.267035	2.34541	0.72804	-0.140052	-0.671815	0.851898	-0.651604	-1.23798	-1.17617	-1.57048	1.20728	16
KLF16 (111g)	-0.403738	0.32441	-1.12908	-0.385115	-0.601984	0.666137	1.20353	-0.261216	-0.635829	0.891648	0.143403	-1.04731	2.60984	-0.699694	-0.244371	1.04151	-1.4911	0.018962	2
ZBTB17_extended (130g)	0.371229	1.90681	-0.802719	-0.14829	-0.134134	1.55277	-0.454476	-0.742717	-1.08283	1.39899	0.785258	-1.08022	0.0993865	-0.963943	-0.411313	0.784926	-1.57698	0.498249	5
PKNOX1 (29g)	0.0355744	1.21183	-0.818701	-0.704942	-0.715131	1.34467	-0.124144	-0.917505	-1.16381	0.974935	0.596721	-0.76263	1.94824	-0.268219	-0.315814	0.118117	-1.60989	1.1707	5
MIOS_extended (217g)	1.15442	2.0525	-0.87855	-0.490386	-0.77496	0.464604	-0.361799	-0.845735	-0.598182	0.977039	0.746035	-0.728498	1.39865	-0.528762	-0.425239	-0.166391	-1.80902	0.814275	5
PPARG (30g)	-0.287036	1.79664	-1.02235	-0.22942	-0.446141	0.780596	0.0523083	-0.36181	-0.736744	1.12078	0.491514	-0.934671	0.902966	-0.582202	-0.377417	-0.682399	-1.5917	2.10709	5
OLIG2_extended (24g)	0.483163	2.02768	-0.732525	-0.259999	-0.677092	2.2046	-1.03922	0.514119	-0.469646	1.09205	0.163716	-0.733669	-0.864575	-0.540682	0.299268	-0.830075	-1.1517	0.514585	5
HEY1_extended (12g)	0.311301	1.17859	-0.632704	-0.141072	-0.275655	0.694882	-0.451129	3.28303	-0.730671	0.736376	0.0364378	-0.669348	-0.519826	-0.614985	-0.447023	-0.626063	-0.836821	-0.295315	10
RORB_extended (11g)	-0.689723	1.36045	-0.551559	-0.101098	-0.0109045	0.0962457	-0.612031	-0.312263	-1.04388	1.31929	0.61986	-0.508055	-0.749415	-0.650139	-0.244974	0.187916	-0.996358	2.88663	11
TRPS1_extended (17g)	0.662283	2.37981	0.0510057	0.243668	-0.310639	1.39597	-1.35236	-0.604333	-0.416701	1.03916	0.640315	0.164264	-1.33205	-0.704924	-0.479969	-0.911447	-1.0882	0.624152	5
ZFP1 (13g)	-0.188746	2.09837	-0.824294	-0.051	-0.283551	0.76417	-1.00619	1.47999	-0.336677	1.19347	0.679404	-0.464469	-1.07073	-0.702629	-0.409898	-0.711341	-1.39995	1.23407	5
NFYA (355g)	0.0257884	0.803495	-0.671584	-1.19631	-0.788563	2.15022	-1.17427	-0.0810959	-0.165056	0.492995	0.0345394	-0.527167	1.7764	0.309057	-0.917278	-1.40985	0.272343	1.06632	8
E2F6 (557g)	-1.10218	1.05296	-0.527355	-0.40781	0.0327019	0.335793	-0.36498	0.200629	0.117866	0.768159	0.478609	-0.0958064	0.323308	-0.381278	-1.11874	-1.41587	-0.869336	2.97332	11
PSMD12_extended (97g)	0.915684	2.39657	-0.317255	-0.980803	-0.337097	0.761124	-1.44738	-0.0715669	-0.173856	1.32506	0.655511	0.33333	-0.473058	-1.16338	-0.655776	-0.674624	-0.986689	0.894197	5
ELK1 (92g)	-0.335755	2.0815	-0.438064	-0.496564	-0.176121	-0.41953	-0.8786	-0.311505	0.442017	1.49201	1.41269	0.488337	-0.0402173	-0.765293	-1.12659	-0.88294	-1.39152	1.34614	11
HOXB2_extended (20g)	-0.907778	-0.785811	2.21534	0.00991924	-0.10219	-0.60042	-0.675533	-0.183067	1.76986	-0.710923	-0.559738	1.39131	-0.875308	0.838347	-0.699896	-0.931397	1.01633	-0.209037	3
NR2C1_extended (83g)	-1.26955	-1.21657	1.57381	-0.197019	0.679104	-0.146635	-1.02367	0.663378	1.73226	-0.769859	-0.845086	0.961896	-0.957729	1.22689	-0.364388	-0.89284	0.91222	-0.0662166	3
RUNX2 (40g)	-1.06182	-0.755327	1.67206	-0.287633	0.86123	-0.516933	-0.928922	0.0723834	2.07832	-0.565672	-0.429796	1.47944	-1.10656	0.451653	-0.826245	-1.01706	0.44348	0.437395	3
CRX (16g)	-0.877668	-0.626828	1.29508	-0.379378	0.11072	-0.523073	-0.853388	1.65322	0.966934	-0.432539	-0.230885	2.42793	-0.933273	-0.339513	-0.836063	-1.05811	0.627064	0.00977239	3
BACH2_extended (202g)	-1.03623	-0.448492	2.19774	-0.431507	0.633006	-0.168041	-1.09774	-0.0270613	0.915626	-0.520264	-0.204566	1.73422	-1.05788	0.0121276	-1.10945	-1.07011	0.76338	0.915248	3
DRGX_extended (193g)	-0.917489	-0.60703	1.95425	-0.498651	0.661118	-0.636341	-0.872276	-0.00489625	1.03901	-0.429348	-0.181666	2.0979	-0.869607	-0.143339	-1.17112	-0.948375	0.442873	1.08499	3
ZEB1 (104g)	-0.684683	-0.675745	0.508187	0.158752	0.655582	-0.523975	-0.216764	3.33612	1.23415	-0.520915	-0.701021	0.077623	-0.677148	-0.320385	-0.631238	-0.783819	-0.0262291	-0.208494	4
TCF7 (354g)	-1.23459	-0.919812	2.10463	-0.720416	0.507723	0.213923	-1.02279	0.333811	1.53901	-0.659588	-0.617144	1.45174	-0.392445	0.586699	-1.00367	-1.0044	0.596445	0.240871	3
LUZP1 (737g)	-0.884637	-0.647379	2.09651	-0.655798	0.574319	-0.0702717	-1.16705	1.12569	1.88841	-0.553264	-0.613586	0.986843	-0.70478	0.606775	-0.944378	-1.01452	-0.00357968	-0.0193097	3
PHTF1 (573g)	-0.759853	-0.755385	1.69055	-0.378049	0.320723	-0.345069	-0.95504	0.39201	1.78356	-0.700137	-0.552238	1.51672	-0.855667	0.540741	-0.990911	-1.19255	1.35806	-0.117457	3
HOXA7_extended (259g)	-0.786848	-0.79651	1.04642	0.221974	-0.154581	-0.344054	0.226356	-0.133684	0.0850527	-0.737704	-0.679645	0.289028	-0.42917	0.393868	-0.474673	-0.684087	3.46478	-0.506527	6
MEF2C (52g)	-0.957482	-0.862857	2.59346	-0.335349	0.0115131	-0.511502	-0.626771	-0.0577862	1.30375	-0.806019	-0.691814	1.43417	-0.319649	0.866068	-0.675084	-0.692731	0.910933	-0.582852	3
SNAI3_extended (99g)	-0.714692	-0.652653	2.64626	-0.101987	0.0487868	-0.494867	-0.686473	-0.383173	0.507674	-0.591427	-0.530416	1.86581	-0.889591	0.200956	-0.605796	-0.467759	1.43376	-0.584406	3
SPIB (413g)	-0.800455	-0.74948	2.46181	-0.323685	0.625074	-0.555346	-0.732446	-0.447032	1.06112	-0.728732	-0.464549	1.82609	-0.758001	0.170381	-0.783803	-0.534935	1.14671	-0.412726	3
IRF4 (336g)	-0.950211	-0.823577	2.4043	-0.387078	0.758711	-0.587851	-0.761693	-0.126611	1.47129	-0.712457	-0.510644	1.56675	-0.719743	0.305769	-0.881608	-0.848721	0.67682	0.12656	3
LHX5 (10g)	-0.730242	-0.718463	1.78263	-0.156017	-0.223021	-0.568486	-0.316369	2.9479	-0.256736	-0.635332	-0.636204	1.15994	-0.621101	0.219797	-0.549379	-0.744187	-0.170759	0.216026	4
FIGLA (30g)	-0.620135	-0.637833	2.50938	0.200137	-0.110426	-0.525113	-0.471846	-0.367252	0.167733	-0.60392	-0.608747	1.79645	-0.651109	-0.188614	-0.560439	-0.639453	1.91919	-0.608	3
GFI1B (14g)	-0.820545	-0.812849	2.56633	-0.144072	0.173574	0.483916	-0.64848	0.283096	1.82421	-0.797386	-0.756851	0.599611	-0.810108	1.03713	-0.717234	-0.855087	0.0420792	-0.647328	3
GATA2 (28g)	-1.04489	-0.999703	2.08712	-0.707814	0.496738	-0.178589	-0.668089	1.3619	0.752676	-0.853987	-0.861349	0.470106	-0.282947	0.889057	-0.775437	-0.949059	-0.378198	1.64246	3
BRCA1 (105g)	-0.327085	-0.34762	-0.202805	0.620416	-0.265104	-0.308465	0.102539	-0.0828103	-0.363132	-0.33423	-0.363964	-0.295759	-0.346863	-0.299711	-0.33836	-0.376278	3.88663	-0.357395	6
SOX4_extended (21g)	-0.538542	-1.15555	1.17763	-0.591774	0.858063	0.57784	-1.18925	0.336229	0.572297	-0.932381	-0.996104	-0.339775	-0.991338	2.25252	0.467412	-1.08423	0.64422	0.932726	9
HES6_extended (39g)	-1.27442	-1.13615	0.445443	-0.265158	0.96531	-0.724409	-0.22958	0.247193	0.813529	-0.707395	-0.809837	0.132377	-0.362782	0.528579	-0.482005	-1.07923	1.31879	2.61974	18
EZH2 (72g)	-0.679364	-0.710819	1.55924	0.243679	0.249034	-0.0672108	-0.529258	-0.214279	-0.206601	-0.517274	-0.591373	-0.162666	-0.583474	0.235367	-0.355767	-0.57719	3.37491	-0.466947	6
E2F7 (768g)	-0.56139	-0.585526	0.795876	0.370159	0.0750769	-0.391449	-0.0856403	-0.103071	-0.19753	-0.515006	-0.443656	0.00172774	-0.569623	-0.14633	-0.494283	-0.53312	3.72834	-0.344555	6
E2F2 (800g)	-0.382519	-0.479012	0.000603047	0.501325	-0.179979	-0.440008	0.0973451	-0.177145	-0.326945	-0.39813	-0.322299	-0.083564	-0.542954	-0.320043	-0.370325	-0.120741	3.88164	-0.337246	6
MYBL2 (505g)	-0.50834	-0.471401	0.147367	0.413412	-0.0995162	-0.473639	0.103182	-0.185324	-0.200164	-0.397253	-0.292342	0.0845007	-0.515088	-0.258972	-0.485103	-0.488901	3.8596	-0.232014	6
MYBL1 (495g)	-0.519241	-0.541552	0.0572977	0.463424	-0.0672352	-0.40561	-0.0616644	0.283652	-0.15297	-0.438513	-0.392703	-0.0338173	-0.585859	-0.225807	-0.45014	-0.460112	3.83336	-0.302511	6
ZNF607_extended (16g)	-0.598135	-0.641446	-0.0973	0.80777	1.16338	-0.43569	-0.359813	3.28403	-0.617163	-0.313501	-0.614644	0.976624	-0.691691	-0.464445	-0.303853	-0.621692	-0.325305	-0.147132	4
BCL11A (25g)	-0.645613	-0.826925	2.16949	-0.150712	1.39256	-0.461082	-1.17313	-0.385544	-0.847472	-0.411255	-0.264177	0.662785	-1.21833	-0.0292901	0.970333	1.66353	0.411342	-0.856511	14
HOXA9 (26g)	-0.618065	-0.845413	1.79268	0.168208	0.649736	-0.587748	-0.965354	0.531025	-0.153084	-0.864242	-0.849972	1.19762	-1.09771	0.443964	0.31182	-0.767362	2.2927	-0.638804	3
SMARCA4_extended (2354g)	1.52943	1.75444	-1.08458	-0.350362	-0.356728	-1.21811	-1.10053	-0.674171	-0.32509	1.36231	1.47521	-0.264854	0.0412026	-1.34124	0.151149	0.883491	-0.439569	-0.0420055	5
GTF2F1 (722g)	1.13801	1.8309	-0.857711	-1.01794	-0.14266	-1.19823	-1.1804	-0.574441	0.0913175	1.3855	1.56157	0.398657	-0.0778961	-1.12921	-0.393447	0.7435	-0.888978	0.311435	5
VEZF1_extended (15g)	1.01667	1.38938	1.3658	-0.988198	-0.0714261	-0.312991	-2.14352	0.0842627	0.618967	1.05305	0.456732	0.449254	-1.59286	-0.992842	-0.281684	0.585048	0.151298	-0.786949	14
RAD21_extended (1894g)	1.68115	1.30829	-0.416225	-0.185828	-0.215807	-1.02993	-1.73385	-0.599405	-0.322819	0.953169	1.08019	0.0327334	-1.1946	-0.986887	0.298502	1.33271	0.816198	-0.81759	13
YY1 (1560g)	0.982991	1.48167	0.129998	-1.12545	0.188487	-0.332551	-2.37094	-0.62151	0.215147	0.848924	1.30233	0.968291	-1.37713	-0.650995	0.0458384	0.750228	-0.11645	-0.318893	14
GTF3C2 (39g)	-0.903117	-0.489102	-1.28293	1.14819	0.452013	-2.27605	0.0974913	-0.520461	0.176339	1.0274	0.964841	-0.453227	0.714842	-0.807591	0.976419	-0.363308	1.68048	-0.142231	6
SUZ12_extended (423g)	-0.393495	-0.0942829	0.0204606	-0.0424026	-0.0603881	-1.71878	-1.49495	0.359223	0.776159	-0.0746597	0.405191	0.490011	-0.710274	-0.163935	-0.00848283	-0.398409	3.13198	-0.0229561	6
SMARCC2 (380g)	0.618059	0.131355	0.00569563	-0.538795	-0.133392	-1.65506	-2.26721	0.167403	0.850045	0.22119	1.02529	0.794794	-1.5417	0.0601455	0.877044	1.20868	0.895864	-0.719409	13
ZNF75D (36g)	0.747352	-0.660694	-0.928432	0.589317	-0.518361	0.0607977	-0.508324	1.07182	-0.497025	-0.743216	-0.471578	-0.872674	0.707664	0.924651	2.60447	0.730729	-1.40003	-0.836467	17
IRF3_extended (1059g)	1.78702	0.013603	-0.621114	0.157529	-0.230822	-0.575484	-0.0308456	-1.34328	-0.709018	-0.232057	0.431343	-0.45625	-0.415802	-0.305672	1.62867	2.04337	0.549622	-1.69081	17
FLI1 (1113g)	1.55389	-0.661669	-0.269812	0.210313	-0.340594	-0.537677	-0.395157	-0.58002	-0.622862	-0.442692	-0.0651519	-0.395477	-0.299027	0.472104	2.24921	2.13156	-0.524079	-1.48286	17
FOXJ2_extended (120g)	2.84996	-0.0765896	-0.276393	0.181599	-0.361645	0.311531	-1.54135	0.498278	0.652637	-0.249308	-0.233854	-0.0770891	-1.51952	0.118613	1.12579	-0.0598751	-0.0132262	-1.32956	13
SETDB1 (237g)	0.428191	-0.309008	-1.1151	0.074822	0.0545285	0.574254	-1.38626	0.00505724	-0.550363	-0.0285644	0.385854	-0.566744	-0.992959	0.0633319	2.33559	2.23172	-0.219348	-0.98499	17
PPARA (11g)	0.411607	-0.481768	-1.29248	0.84179	0.602281	-0.816079	1.13002	0.878123	1.49068	-0.488718	-0.486503	-1.19994	1.98015	-0.0635117	-0.193272	-0.913032	-1.48389	0.0845399	16
ZNF319_extended (25g)	2.01312	-0.300834	-0.813213	-0.0322534	-0.336481	1.10214	0.670006	-0.211663	-1.04394	-0.383932	-0.47299	-0.999858	1.92498	-0.556251	0.882086	0.787739	-1.20137	-1.02729	1
JDP2_extended (12g)	2.43314	0.407826	-1.32194	0.21496	-0.726116	0.935933	-0.0907613	-0.578123	-0.78899	0.252422	0.198998	-1.04204	1.60498	-0.106651	0.707955	0.0808507	-1.29836	-0.884083	1
FOXO4 (18g)	2.52157	0.136664	-0.875212	0.327014	-0.417833	-0.134484	-0.338346	-0.651635	-0.606513	0.135556	0.078278	-0.80452	-0.329651	-0.67872	1.2939	2.06322	-0.847353	-0.87194	1
ZNF76_extended (400g)	0.564856	0.0822756	-0.734113	-0.115753	-0.433961	-0.0933278	0.254908	-0.519819	-0.80554	0.516416	0.524771	-0.918093	1.16312	-0.829387	0.442873	3.01264	-1.1361	-0.975776	15
ARNT (98g)	1.49839	1.12514	-1.12633	-0.141967	-0.604591	-0.894307	-0.196197	-0.66529	-0.679275	1.14048	1.02558	-0.891264	1.21244	-0.948231	0.313103	1.48698	-1.49748	-0.157179	1
CEBPG_extended (16g)	0.423642	0.309908	-1.5361	-0.00962541	0.101499	1.9053	-0.93638	1.03249	-0.752035	-0.325502	-0.121971	-0.838944	-0.963258	-0.679516	2.37515	0.338348	0.14965	-0.472665	1
THAP1 (253g)	0.867885	-0.00371516	-1.68218	0.533847	0.105427	0.700461	-0.391932	0.0609362	-1.32561	0.137192	-0.00230706	-0.735422	-0.793228	-0.753784	2.745	1.09926	-0.111443	-0.450371	1
REST (132g)	-0.634282	1.18344	-1.75133	-0.0921422	-0.281663	-0.663612	-0.62598	0.400365	0.218972	1.26299	0.962332	-0.923727	0.863315	-0.720043	0.30365	0.912411	-1.84331	1.42862	15
GABPA (1361g)	0.911151	0.690793	-1.6159	0.428191	-0.427952	-1.26893	-0.318142	-0.0879447	-0.705024	0.866417	0.853136	-1.24814	0.848736	-0.779585	1.51547	1.64865	-1.01626	-0.294665	1
RBBP5 (918g)	0.462548	1.04453	-1.99214	0.425277	-0.699301	-0.385535	-0.440776	0.672987	-0.814454	1.04477	0.659306	-1.40218	1.34008	-0.953579	1.37266	0.74298	-0.976483	-0.100691	1
ELK4 (1527g)	1.21612	1.54646	-1.35046	-0.168221	-0.509941	0.519681	-1.19303	0.269812	-0.353617	1.31216	0.937793	-0.769198	-0.0836135	-0.879036	0.753495	1.11671	-1.7031	-0.662018	1
SP1 (28g)	1.32759	0.714073	-1.25508	0.30789	-0.371841	0.561342	-0.740107	-0.0368124	-1.02309	0.734649	0.538411	-1.04011	-0.287106	-0.672402	1.55352	1.88545	-1.39986	-0.796526	1
SP2_extended (833g)	1.88133	1.28169	-0.780021	-0.587237	-0.220833	-0.17851	-0.811053	-1.07601	-1.09188	0.412446	0.883932	-0.59814	0.396927	-0.90491	1.22532	1.5968	-0.258239	-1.17161	1
ZNF143 (574g)	1.42208	1.17249	-1.35052	-0.108725	-0.304573	1.31725	-0.94871	-0.165794	-1.0721	0.469167	0.421395	-1.0386	-0.397166	-0.817542	1.68099	1.24832	-0.829235	-0.698731	1
KLF9_extended (10g)	-0.259287	-0.643616	-0.306997	-0.754952	-0.449712	2.21982	-1.9686	1.33278	0.186781	0.67115	0.261506	0.789712	-1.18677	0.341091	0.244631	1.05518	-0.873185	-0.659536	10
CEBPD (27g)	0.284321	-0.539206	0.155168	-1.30312	-0.232808	2.38579	-2.20667	-0.326547	0.597272	-0.154978	0.175736	0.598205	0.531319	1.48195	-0.092439	-0.159943	-0.90448	-0.289566	8
ZNF217 (20g)	-1.14696	-1.14011	1.53316	-1.10727	-0.0766874	1.13076	-1.14262	-0.264557	0.384101	0.0532107	-0.374297	0.279397	1.47414	1.24172	0.916072	0.489692	-1.60173	-0.648039	8
IRF8_extended (462g)	-1.64177	-1.31328	1.75088	-1.02469	0.989069	0.120803	-0.380648	-0.310425	0.0246953	-0.410555	-0.40987	-0.393138	1.87316	1.10747	0.304691	0.935436	-0.991027	-0.230818	8
FOXP1 (70g)	-1.15315	-1.38674	1.7035	-1.17106	0.17304	-0.113393	-1.86778	0.432317	1.09773	-0.564763	-0.29815	0.941159	0.114183	1.56018	0.23433	0.794505	-0.230144	-0.265771	8
MSX2 (23g)	-0.963371	-0.991946	-0.243944	-0.222242	0.0394911	-0.567795	-0.513928	2.62036	1.51868	-0.402104	-0.756688	0.338364	-0.0795374	1.08535	-0.411706	-1.04852	-0.632066	1.2316	16
ETS2_extended (24g)	0.507629	-0.0452682	2.00358	-0.961631	-0.305359	1.60164	-1.45691	-0.155738	0.998719	-0.687675	-0.391212	1.21015	0.0367327	0.507161	-1.24327	-1.43831	-0.186938	0.0067002	12
XBP1 (257g)	0.117892	-0.420853	2.18324	-1.39724	0.436578	1.18442	-1.32452	-0.103908	0.597265	-0.278606	-0.403758	0.199063	1.5008	0.758567	-0.90793	-1.41102	-0.66912	-0.0608764	8
CREBL2_extended (23g)	-1.50524	-0.790394	1.1593	-0.397015	0.734939	-1.38115	0.524789	-1.22118	1.17929	-0.648594	0.37982	0.779778	0.902395	1.44725	-0.759902	-0.688163	-0.814413	1.0985	18
RFX5 (876g)	-1.70863	-1.49519	1.68833	-0.175489	1.2246	-1.09567	0.367558	-0.747286	0.643775	-1.06088	-0.491899	0.774336	0.318839	0.96151	-0.446307	-0.118852	1.39569	-0.034449	9
FOXN3 (263g)	-1.00341	-0.955074	2.16758	-0.890857	0.327176	-0.618225	-1.02763	-0.247897	1.8413	-0.695837	-0.306172	1.25759	-0.043284	1.24261	-0.59653	-0.366832	0.400727	-0.485232	3
NFE2L3_extended (11g)	-1.12452	-0.977461	1.71957	-0.357496	2.49794	-0.720813	-0.400776	-0.203525	1.5283	-0.877332	-0.31474	0.483091	0.40668	0.21144	-0.366138	-0.143366	-0.628078	-0.732771	18
BATF3 (20g)	-2.02708	-1.36629	2.17453	-0.534393	0.315557	-0.722055	0.340263	-0.585475	0.695459	-0.371233	-0.671519	1.23359	1.11915	0.77991	-0.346136	0.198884	0.263599	-0.496763	9
ZNF263_extended (435g)	-1.8462	-0.597153	0.628202	-0.898881	-0.012724	0.133869	-0.325013	0.361704	0.838972	-0.290233	-0.274753	0.320447	1.51319	1.14892	-0.799067	-1.42964	-0.530304	2.05867	8
BHLHE40_extended (74g)	-1.53939	-0.733871	1.53731	-1.28737	0.11148	1.48739	-0.328334	0.0716654	0.09012	-0.390407	-0.514181	0.0798351	2.04682	0.828965	-0.7698	-0.815206	-0.699242	0.824209	8
HIVEP2 (202g)	-1.19307	-0.826735	2.43968	-0.660077	1.01155	-0.5547	-0.607302	-0.164756	1.37159	-0.657215	-0.39943	1.34648	0.130207	0.306847	-1.13132	-0.964628	0.180629	0.372245	3
PRDM1 (115g)	-1.15012	-0.956882	2.43848	-0.580756	0.628168	-0.0402982	-0.470341	-0.321464	1.49289	-0.83324	-0.648462	0.44936	0.342311	1.22975	-0.879995	-1.249	0.0545318	0.49506	3
HIVEP3 (39g)	-1.38086	-0.365633	2.5278	-0.216634	1.39412	-0.744256	-0.791505	-0.572973	1.78196	-0.266019	0.0146916	0.613371	-0.443554	0.152245	-0.910871	-0.471866	-0.409545	0.0895344	18
NFATC1_extended (21g)	-1.10139	-0.261052	2.59195	-0.926412	1.15793	0.22535	-1.59258	-0.497421	0.651813	-0.216358	0.0302586	1.04819	-0.972111	-0.164793	-0.883345	0.125988	-0.00804546	0.792034	3
NFE2L2_extended (1157g)	-0.990002	-0.524018	2.79573	-0.944741	0.553238	0.0948134	-1.16174	-0.74721	0.801619	-0.611142	-0.139658	1.43705	-0.155248	0.578196	-1.03215	-0.339811	0.415648	-0.0305765	3
REL (1471g)	-1.40374	-0.638413	2.39611	-0.992906	0.802127	0.163911	-1.33619	-0.526837	1.1433	-0.421954	-0.0925703	1.18045	-0.338027	0.690137	-0.967161	-0.387476	-0.0430167	0.772248	3
NFKB1 (809g)	-0.922755	-0.430914	2.96982	-0.686219	1.51792	0.154375	-1.15921	-0.548414	0.517866	-0.415543	-0.225037	0.647318	-0.471741	0.0833909	-0.964555	-0.528341	-0.117839	0.579876	3
HIVEP1 (509g)	-1.4608	-0.619987	2.94017	-0.946014	0.702411	0.0177636	-1.04537	-0.571431	0.47808	-0.277882	-0.143412	0.716367	0.251266	0.449106	-0.976837	0.160286	-0.504539	0.830819	3
FOSB (210g)	-0.665937	-0.358666	1.55414	-1.11141	0.0203337	2.45691	-1.40433	-0.521034	0.745547	-0.577551	-0.375318	0.674434	-0.0383209	1.09242	-0.720825	-1.07948	0.359769	-0.050685	8
KLF4_extended (17g)	-1.43383	-1.04462	1.08787	-1.45079	0.154404	1.92199	-1.68503	-0.390568	0.423337	-0.471276	-0.072876	0.849137	0.879034	1.13291	-0.449093	-0.142092	0.021625	0.669863	8
JUNB (49g)	-0.943662	-0.714584	1.51563	-1.07068	0.236706	1.92373	-1.26765	-0.827902	0.713353	-1.04154	-0.384891	0.909008	0.260719	1.29323	-0.626134	-0.93744	0.65999	0.302129	8
FOS (158g)	-0.348358	-0.820035	0.094559	-0.797139	-0.242857	2.83559	-1.04635	-0.481586	-0.0538175	-0.881257	-0.626736	-0.172546	0.723914	1.8052	0.562981	-0.700351	0.481911	-0.333117	8
DBP_extended (258g)	-1.52834	-1.49564	0.6799	-0.577402	0.0835028	-0.179763	0.76233	0.0999307	-0.133587	-1.11893	-1.08202	-0.318397	1.28482	2.2109	1.09758	-0.559312	0.614053	0.160373	9
ATF3 (543g)	-1.3455	-1.06598	1.24638	-0.976729	0.162758	1.92466	-0.702735	-0.300088	0.445541	-0.967039	-0.746707	0.195774	0.799955	1.88536	-0.318861	-0.94693	0.18685	0.523295	8
JUN (230g)	-1.13614	-1.05849	0.548193	-1.06172	-0.0254513	1.79765	-0.121617	0.264995	0.020394	-0.859703	-1.03865	-0.438106	1.62365	1.84188	0.526062	-1.14652	-0.167231	0.430802	8
KLF8_extended (17g)	-0.598918	-1.1158	2.32371	-0.860324	1.0821	1.3489	-1.49213	1.31549	0.0678133	-1.10725	-0.653468	0.219517	-0.195043	0.520621	-0.148977	-0.480758	-0.0249493	-0.20053	3
IKZF1 (368g)	-0.683853	-1.07494	3.02255	-0.487638	0.861416	-0.370621	-0.975468	-0.144042	0.891603	-0.800671	-0.806557	0.692701	-0.484423	0.689275	0.0106004	-0.284674	0.60195	-0.657211	3
IRF1 (271g)	-0.771642	-0.862291	2.89821	-0.8615	1.52671	0.888748	-1.3326	-0.246249	-0.0322519	-0.53847	-0.612638	-0.00622303	-0.168279	0.591395	-0.0028071	-0.0605041	0.258923	-0.668527	12
KLF10 (120g)	-0.505855	-0.0107436	2.03567	-1.14299	0.216054	2.56983	-1.84185	-0.42114	-0.0144722	0.0808089	-0.168571	0.20623	-0.516486	0.573167	-0.459597	-0.288883	-0.324521	0.0133512	12
NFKB2 (611g)	-0.67002	-0.390092	3.01895	-0.836906	1.33937	1.0356	-1.46958	-0.748125	-0.0538804	-0.316345	-0.161309	0.198372	-0.467754	0.136465	-0.509899	0.432231	-0.237604	-0.299476	12
EGR4 (34g)	-0.559859	-0.590553	3.62912	-0.507204	0.640179	0.549246	-0.750142	-0.14832	0.0437882	-0.529873	-0.53206	-0.0424444	-0.289237	0.326058	-0.508878	-0.680319	0.233417	-0.282914	12
EGR1_extended (39g)	-0.574539	-0.610033	2.04274	-1.03618	-0.0167659	2.32751	-1.07519	-0.186822	0.293972	-0.639445	-0.8236	-0.20856	0.451146	1.34585	0.119564	-1.04676	-0.0492843	-0.313609	8
EGR3_extended (19g)	-0.902242	-0.585946	1.58145	-1.09468	-0.266902	2.4154	-0.589307	-0.00874853	-0.104755	-0.681193	-1.01607	-0.26092	1.19237	1.42137	0.0205001	-0.923558	-0.110266	-0.0865102	8
MYC_extended (148g)	-0.452131	-0.152054	0.547369	-0.583383	-0.182003	0.635707	-0.185714	3.6985	-0.339234	-0.139328	-0.60615	-0.568591	0.114718	-0.0725074	-0.367485	-0.770352	-0.637292	0.0599256	4
KLF6_extended (41g)	-0.205717	-0.55437	0.877016	-1.10425	0.0977299	2.8341	-0.967165	0.14284	0.046015	-0.820605	-0.794751	-0.496535	1.40462	1.01591	-0.0225948	-0.704818	-0.7793	0.0318692	8
MAFF (21g)	-1.16214	-0.678172	1.67017	-1.25131	0.263709	1.9695	-0.988343	-0.151217	0.558219	-0.445678	-0.629641	-0.0785055	0.983116	1.35722	-0.454903	-0.95829	-0.722777	0.719035	8
NR2F6 (212g)	-0.377267	-0.420057	-0.356654	0.197145	0.0773334	-0.298445	0.485993	3.88437	-0.249039	-0.3135	-0.45866	-0.427036	-0.196747	-0.228489	-0.325668	-0.397959	-0.368361	-0.22696	4
ZNF471 (12g)	-0.289871	-0.312819	-0.283964	0.223743	-0.198785	-0.287877	0.136623	3.95879	-0.315276	-0.242497	-0.315938	-0.310776	-0.284543	-0.271976	-0.266443	-0.30609	-0.325984	-0.306322	4
FOXC1 (111g)	-0.325647	-0.32606	-0.2397	0.0843612	-0.133456	-0.260097	0.243328	3.95012	-0.241581	-0.199795	-0.412327	-0.29482	-0.238648	-0.243664	-0.353881	-0.463539	-0.359072	-0.185515	4
GRHL1_extended (15g)	-0.643825	-0.628611	-0.540998	0.402171	3.03937	-0.246017	-0.0658774	2.01734	-0.527543	-0.633926	-0.689572	-0.49289	-0.063042	-0.362946	0.0817057	-0.638211	-0.459254	0.452127	4
NR1I3_extended (25g)	-0.926572	-0.916988	0.0463578	0.0396847	-0.0758336	1.18879	-0.393668	2.9493	0.218855	-0.381027	-0.920817	-0.0268918	-0.542419	1.32799	-0.125942	-0.987505	-0.877766	0.404455	4
ZNF135 (14g)	-0.635104	-0.625583	-0.559339	0.732488	0.279735	2.06766	-0.318881	2.93124	-0.222928	-0.0166471	-0.656211	-0.484854	-0.619707	-0.20663	0.170365	-0.683811	-0.63146	-0.520343	10
RORA (13g)	-0.468388	-0.471019	-0.427776	0.352798	0.628642	-0.358517	0.319472	3.7732	0.110736	-0.375857	-0.468532	-0.337422	-0.394881	-0.406389	-0.216423	-0.473103	-0.377026	-0.409511	4
HOXB4_extended (21g)	-0.338036	-0.355887	-0.270983	0.473239	-0.154077	-0.303538	0.126303	3.91673	-0.358582	-0.292519	-0.363148	-0.309186	-0.352909	-0.191544	-0.268073	-0.364662	-0.243991	-0.349134	4
DDIT3 (41g)	0.216489	-0.282884	0.000283189	-1.19495	-0.647126	1.54587	-1.31899	-0.425271	-0.320124	-0.268946	-0.362379	-0.706832	1.63592	1.47089	1.99042	-0.340849	-0.996314	0.00478521	8
HDX (14g)	-0.172077	-0.368461	0.897088	-0.518208	0.74883	2.21517	-0.739377	-0.132311	-1.79357	-0.278353	-0.776842	-0.800869	0.846688	0.0940504	1.21531	1.24771	-0.766835	-0.91795	1
POU2F1_extended (11g)	-0.895454	-0.748258	-0.626821	-0.044988	-0.250281	-0.0118429	-0.128133	1.42037	-0.937092	-0.051818	-0.0321885	-1.03711	0.484836	-0.0769283	0.732969	3.13473	-0.739994	-0.192003	15
KLF2 (164g)	-0.66997	-0.511194	-0.555987	-0.763932	-0.437263	1.41909	0.917767	0.151112	-0.977389	-0.10245	-0.473583	-1.01083	2.5718	0.176085	0.557414	1.31363	-1.07301	-0.531284	2
BRF2 (19g)	-1.20565	-0.903123	-0.862865	0.750111	0.989477	-0.347887	0.0602778	0.452198	-0.752947	-0.656217	-0.67554	-0.87981	-0.591236	0.167278	1.75191	-0.714156	1.91967	1.4985	4
ZNF436_extended (15g)	-0.725542	-0.777748	-0.598763	-0.139262	0.0760438	0.22686	-0.38323	2.45325	-0.650685	-0.538356	-0.81713	-0.814773	-0.410968	0.622129	2.53827	-0.391697	0.256127	0.075476	4
MYB (14g)	-0.745627	-0.826985	-0.276583	0.520987	0.362451	0.154236	-0.730848	0.677201	-0.562113	-0.30413	-0.835776	-0.662887	-0.527293	0.855189	3.4076	-0.234686	-0.0851725	-0.185566	17
ZNF140 (15g)	-0.664295	-0.576756	-0.771924	0.860745	-0.176866	-0.474108	1.99794	0.375603	-0.856174	-0.876265	-0.893763	-0.40702	1.52788	0.654387	1.93092	-1.0127	-0.715733	0.0781235	2
ZNF658 (14g)	-0.430741	-0.66457	-0.837222	0.444524	-0.1578	-0.118038	3.57887	0.797843	-0.57671	-0.317831	-0.654661	-0.7709	0.2828	-0.0908914	0.411162	-0.24741	-0.272478	-0.375947	2
SP4 (19g)	-0.83502	-0.85945	-0.664682	0.16261	-0.100215	-0.00239228	-0.404942	0.794169	-0.45273	-0.527762	-0.638023	-0.793923	-0.342285	0.219192	0.908532	3.43123	0.0346145	0.0710775	15
CFL2 (14g)	-0.920862	-0.905172	-0.565337	0.1421	0.649855	-0.216924	0.393844	2.99197	0.625572	-0.408266	-0.881732	-0.690403	0.150724	1.15815	-0.477774	-0.979722	-0.757598	0.691569	16
ZNF500 (11g)	-0.712281	-0.809867	-0.536824	-0.311138	-0.240737	0.622599	-0.244143	3.27757	0.436161	-0.605877	-0.777565	-0.651513	0.321821	1.13598	0.432527	-0.729862	-0.703299	0.0964467	4
ZNF777 (14g)	-0.927109	-0.827997	-0.776564	0.301346	0.0462586	-0.404358	1.76375	1.70517	-0.6372	-0.631649	-0.735309	-0.757373	2.22377	0.0230299	-0.0279329	-0.754135	-0.518424	0.934728	2
ZNF382 (16g)	-0.852217	-0.902575	-0.729093	0.460964	-0.269043	-0.739832	2.36736	1.61872	0.304652	-0.702863	-0.865938	-0.788389	1.55011	0.766641	-0.0102964	-0.667529	-0.6765	0.135826	2
ZNF260_extended (14g)	-0.877568	-0.912499	-0.77779	0.526471	-0.013215	-0.426927	0.93845	2.80224	0.267141	-0.694179	-0.846756	-0.668408	0.971111	0.953352	-0.382181	-0.935375	-0.671369	0.747503	16
ZNF441 (13g)	-0.97122	-1.00778	-0.784772	0.21422	-0.324868	0.186552	0.463078	2.20251	-0.462251	-0.69659	-0.898696	-0.904411	0.290666	1.86568	1.72762	-0.343191	-0.393246	-0.163293	4
CEBPA_extended (30g)	-0.56709	-1.31441	-0.512888	-0.710198	-0.0968908	0.568063	0.85719	-0.122752	-0.0696668	-0.854241	-1.09126	-0.969854	1.53918	1.0525	1.50882	-0.365149	-0.78379	1.93244	2
ZNF616 (19g)	-1.06933	-0.960165	-0.626417	-0.28	-0.381597	-0.145371	2.16327	0.122171	-0.161845	-0.759517	-0.800699	-0.876532	1.78818	1.68979	0.835123	-0.594118	-0.463859	0.520901	2
HNF1A (33g)	-1.01514	-1.03001	-0.214209	0.31982	0.652649	-0.554511	1.49379	2.10433	1.51666	-0.511775	-1.04304	-0.809513	-0.51117	0.916004	-0.598062	-1.12017	0.56783	-0.16348	16
TFAP2C (18g)	-0.812599	-0.755659	-0.385602	-0.186759	0.152778	-0.552471	2.08319	2.18393	-0.720859	-0.53477	-0.803776	-0.738048	0.94782	1.55061	-0.108581	-0.837854	-0.336969	-0.144375	2
HOXB6_extended (27g)	-0.533448	-0.542881	-0.154167	-0.323535	-0.192958	-0.511068	2.55857	0.979065	-0.504272	-0.544	-0.53283	-0.399687	2.56463	0.0428918	-0.451863	-0.548921	-0.437459	-0.468066	2
HESX1_extended (13g)	-0.833382	-0.838881	0.974246	0.312804	1.8301	-0.721416	2.11752	-0.641415	-0.403113	-0.80361	-0.709079	-0.351129	1.60184	0.695711	-0.586028	-0.744736	-0.411888	-0.487556	6
HSF2 (22g)	-0.532095	-0.679096	-0.028414	0.147567	-0.1575	-0.611349	-0.320737	0.598772	3.49334	-0.49337	-0.646409	-0.340825	-0.535563	0.674115	-0.593733	-0.852348	0.133092	0.744558	18
MEF2A (14g)	-0.919719	-0.910445	1.41015	-0.348959	-0.513937	-0.704266	0.0675943	0.295175	2.73553	-0.812545	-0.783334	0.368116	0.735489	1.08111	-0.703247	-1.0105	0.356955	-0.343178	18
ESR1 (15g)	-0.90116	-0.739791	0.067455	-0.308879	-0.416874	-0.687864	2.4681	-0.167767	0.18609	-0.486087	-0.535512	-0.401873	2.36812	0.789201	-0.625365	-0.803814	-0.521515	0.717533	2
TCF4_extended (12g)	-0.963896	-0.983312	1.25156	-0.475884	-0.354399	-0.886335	0.794722	1.81142	0.917793	-0.828402	-0.763027	-0.0713125	0.773223	1.94212	-0.88227	-1.03436	-0.371369	0.123738	16
ETV5 (24g)	-0.769012	-0.709804	0.491918	-0.349098	-0.346943	-0.656785	2.51971	-0.130503	0.23341	-0.625787	-0.662239	-0.19295	2.56409	0.357283	-0.659853	-0.700234	-0.120574	-0.242631	2
NFATC2 (184g)	-1.19122	-1.11581	1.26888	-0.393301	-0.148556	-0.806504	1.62858	0.234605	0.985689	-0.964001	-0.87337	0.294346	1.83793	0.919314	-0.885577	-1.15891	0.291051	0.0768589	16
CREB3L2 (425g)	-0.97339	-0.797818	0.268085	-0.161774	0.305291	-1.44607	0.590962	0.168135	1.51038	-0.479449	-0.525123	0.00670061	0.625686	0.495193	-0.94309	-1.42543	0.263393	2.51831	18
MAX (40g)	-0.524167	-0.875241	-0.0933059	-0.148075	0.177127	-1.26663	1.33754	0.467129	1.64296	-0.909115	-0.800223	-0.174397	2.43167	0.615882	-0.436271	-1.17223	-0.448636	0.175978	16
MBTPS2 (11g)	-0.518266	-0.368533	-0.588497	0.487363	-0.320151	-0.638622	1.82248	0.888937	-0.530011	-0.142203	-0.360457	-0.613421	3.08555	-0.337817	-0.423829	-0.561371	-0.620404	-0.260749	2
ZNF282 (29g)	-0.96801	-0.953523	-1.08694	-0.147096	-0.288579	-0.39116	0.360709	0.743672	1.41112	-0.274317	-0.286844	-1.04217	2.10273	0.764852	-0.0961361	-0.19935	-1.35407	1.7051	16
TCF12_extended (456g)	-1.0645	-0.269969	-0.692992	-0.275978	-0.515024	-0.46845	1.04168	0.233572	0.187477	0.19487	-0.0861588	-0.747337	2.70916	0.426976	-0.304169	-0.628395	-1.44062	1.69986	2
YY2_extended (11g)	-1.69636	-0.0622735	-1.22222	-0.458603	-0.700121	0.172011	0.50163	-0.194412	-0.429721	0.855184	0.923922	-0.792117	1.90972	-0.0464749	0.156379	0.989713	-1.46153	1.55526	15
HOXB7 (10g)	-0.376877	-0.337252	-0.355521	-0.274251	-0.354126	-0.358773	3.16791	-0.144499	-0.306011	-0.370355	-0.382026	-0.384999	2.25106	-0.268165	-0.379584	-0.395285	-0.371383	-0.35987	2
MAF (142g)	-0.718961	-0.587842	-0.195007	-0.29172	-0.309379	-0.604971	2.19423	0.036491	-0.212524	-0.42761	-0.360208	-0.605818	3.00682	0.296109	-0.435555	-0.181973	-0.790546	0.188463	2
NFE2L1_extended (318g)	-0.597963	-0.449784	-0.605387	-0.197333	-0.233253	-0.465652	2.19257	0.282034	-0.339161	-0.262929	-0.352185	-0.749622	2.99678	-0.181361	-0.301512	-0.185077	-0.873561	0.323398	2
NR1H3 (747g)	-0.582249	-0.50134	-0.292007	-0.231781	-0.234468	-0.664196	2.28541	0.0142102	-0.147741	-0.38787	-0.380296	-0.616238	2.93416	0.0581389	-0.539038	-0.375239	-0.783294	0.443838	2
SPIC (465g)	-0.432522	-0.38705	-0.240426	-0.256701	-0.326354	-0.57712	2.32377	-0.156675	-0.275409	-0.321817	-0.359167	-0.594807	3.02655	-0.0350653	-0.431077	-0.258352	-0.770754	0.0729785	2
ZNF629 (26g)	-0.511971	-0.263744	-0.95896	-0.179654	-0.243591	-0.320634	1.88822	0.671357	-0.144794	-0.126887	-0.39008	-0.78938	2.92413	0.207752	-0.325762	-0.810982	-1.07836	0.453339	2
TFEC_extended (196g)	-0.531318	-0.00248719	-0.140903	-0.414674	0.875417	0.814797	0.18309	-0.588786	-0.169944	-0.566102	-0.198476	-0.927542	2.44108	0.984488	-0.00480998	-1.14431	-1.89269	1.28317	2
SREBF1 (1031g)	-0.732411	-0.0857902	-0.299779	-0.572824	-0.352222	-0.311861	1.49541	-0.199978	0.00972952	-0.0831287	-0.107217	-0.561204	3.13195	0.151119	-0.753634	-0.60374	-1.16563	1.04121	2
HOXB5 (20g)	-0.424247	-0.38173	-0.429116	-0.316403	-0.266564	-0.404423	2.81319	0.499959	-0.430649	-0.38672	-0.430267	-0.441484	2.55049	-0.356245	-0.392504	-0.438726	-0.435654	-0.328901	2
ESRRB_extended (20g)	-0.426583	-0.425766	-0.413741	-0.162102	-0.200696	-0.369979	3.22461	-0.150616	-0.415074	-0.424754	-0.436673	-0.426988	2.15091	-0.308863	-0.245884	-0.216151	-0.421277	-0.330375	2
HES5_extended (11g)	-0.430671	-0.433502	-0.423057	-0.28291	0.0929857	-0.422214	2.75853	0.0987525	-0.425763	-0.440417	-0.435261	-0.429864	2.66126	-0.361969	-0.272845	-0.439231	-0.400282	-0.413545	2
GATA3 (57g)	-0.53473	-0.565633	-0.416833	-0.121731	0.245739	-0.552213	2.8808	1.38188	-0.57529	-0.528606	-0.528766	-0.4948	1.9016	-0.440238	-0.435599	-0.352457	-0.447446	-0.415667	2
HOXA1_extended (26g)	-0.523144	-0.667578	-0.34416	-0.286384	-0.00886467	-0.435292	1.48775	-0.00098126	-0.599004	-0.363869	-0.342258	-0.596471	1.53916	-0.674784	0.23788	2.96771	-0.522799	-0.866917	15
POLR3G_extended (36g)	-0.560118	-0.620143	-0.44253	-0.147059	-0.163021	-0.583955	2.18571	2.35996	-0.452367	-0.545742	-0.604691	-0.511747	1.81837	-0.376891	-0.526192	-0.629889	0.121265	-0.320966	2
ETV1_extended (99g)	-0.380775	-0.459659	-0.443875	-0.211337	-0.338835	-0.458289	2.67417	1.08125	-0.460139	-0.456112	-0.500876	-0.505146	2.45305	-0.315708	-0.40521	-0.423604	-0.495318	-0.353583	2
PLG (125g)	-0.4573	-0.480997	-0.205285	-0.307639	-0.310496	-0.483102	2.60366	0.5869	-0.273813	-0.4613	-0.597219	-0.590455	2.61015	0.00672928	-0.511055	-0.5998	-0.713133	0.184152	2
GLIS3 (11g)	-0.0998595	-0.167335	1.02067	-0.24586	-0.113295	-0.0243	-0.679279	-0.214893	3.61988	-0.470676	-0.231361	-0.0932962	-0.702757	0.268018	-0.690522	-0.926017	-0.225653	-0.0234617	18
BHLHE22 (10g)	0.564536	0.169332	0.452152	0.260008	2.95018	1.4898	-0.890178	-0.674195	-0.553391	-0.00746214	0.459843	-0.170165	-1.14951	-0.676045	-0.750189	-0.751383	-0.859896	0.136566	6
MSC_extended (25g)	1.94281	1.00782	0.727363	0.14629	1.01299	1.28513	-1.65812	0.375764	-1.02641	0.585499	0.308355	-0.591236	-1.50861	-0.829121	-0.420123	0.0911737	-0.884921	-0.56465	7
POU6F1_extended (17g)	2.8931	-0.152102	1.17653	0.265133	-0.792469	-0.180631	-0.717936	1.51975	0.740949	-0.46154	-0.791085	-0.552603	-0.942081	-0.408583	-0.0547283	-0.796844	-0.330079	-0.414777	13
ETV2 (27g)	3.56278	-0.304046	-0.168654	0.290125	-0.395326	-0.0193199	-0.630954	0.609304	-0.305821	-0.315707	-0.601747	0.188035	-0.925526	-0.645576	0.709252	-0.112195	-0.0435677	-0.891057	13
HOXA10_extended (21g)	-0.108694	-0.721215	0.571947	0.962234	0.109531	-0.0900714	-0.61563	2.60952	-0.682066	-0.555494	-0.815332	1.48115	-0.885455	-0.565409	-0.536786	-0.656309	1.3507	-0.852621	4
NHLH1 (40g)	2.25091	0.468759	-0.407818	0.112395	-0.27588	0.568047	-0.743328	-0.118839	-1.03662	0.127543	-0.88187	-0.830691	-0.459751	0.602738	2.49058	-0.823974	-0.595349	-0.446845	13
MZF1 (50g)	1.86894	0.679733	0.385885	-0.261769	-0.288734	2.31728	-1.39162	-0.640239	0.44463	-0.351748	-0.00241593	0.228496	-1.50201	0.0905965	0.40079	0.12324	-1.10978	-0.991276	7
NFE2_extended (32g)	3.66075	0.307397	-0.462667	0.737247	-0.469975	0.182069	-0.200593	0.0362014	-0.647329	-0.0753182	-0.422307	-0.518254	-0.613784	-0.621927	0.315137	-0.0100794	-0.618096	-0.578472	13
ZNF467 (37g)	3.65902	0.69264	-0.302645	0.515595	-0.523132	0.319481	-0.730246	-0.296491	-0.375211	0.0453892	-0.212693	-0.259715	-0.598505	-0.562918	0.134976	-0.300366	-0.524419	-0.680758	13
MAFB_extended (268g)	1.82685	1.5711	-0.405446	-0.37584	-0.81699	2.15049	-0.716067	-0.842673	-0.846454	0.720355	0.0613332	-0.807529	0.46904	-0.161648	-0.0611611	0.0407964	-1.45072	-0.355427	7
RUNX1 (19g)	1.99715	1.47721	-0.177243	-0.724648	-0.886783	1.67284	-0.669701	-0.601405	1.14635	0.432744	-0.102791	-0.591214	0.465608	-0.0956298	-0.208073	-1.34447	-1.30575	-0.484196	7
CEBPB (138g)	1.21683	1.41388	0.0176338	-0.977755	-0.868121	2.37477	-1.37191	-1.10849	-0.488864	0.728066	0.553987	-0.0995666	0.309104	0.0608865	-0.35095	0.282981	-1.19213	-0.500339	7
MAFK (35g)	0.195275	1.23616	-0.082427	-1.09469	-0.672179	2.88024	-1.39699	-0.472373	-0.460342	0.738594	0.323235	-0.324965	0.422329	0.0351231	-0.677258	-0.150436	-1.1309	0.631598	7
JUND (302g)	0.670323	0.689033	0.373783	-1.21537	-0.360571	3.05931	-1.65874	-0.664178	-0.397299	0.318897	0.181864	0.265353	0.0326319	0.0396269	-0.391101	0.481439	-0.636957	-0.788052	7
ELF1_extended (472g)	1.27044	1.129	0.838355	-1.34676	-0.334298	1.13111	-2.28004	-0.846422	-0.0557422	0.523312	0.713248	0.829168	-0.461205	-0.068515	-0.311374	0.995149	-0.757561	-0.967869	14
ATF4 (575g)	0.775892	1.10233	0.665834	-1.58931	-0.156361	2.20009	-2.27878	-0.466658	0.23368	0.490596	0.435701	0.661889	-0.389464	0.033201	-0.548607	-0.295169	-0.651213	-0.223658	7
TBX3_extended (26g)	1.14837	1.42731	-0.73961	0.36805	-0.0931019	0.190202	-1.12113	0.977319	0.168736	0.757565	1.77038	0.727491	-0.935024	-0.710274	-0.96581	-0.962046	-1.77388	-0.234547	5
MAFG (64g)	0.999708	1.1073	-0.0407424	-0.606199	-0.332855	3.14569	-1.25572	-0.202558	-0.236925	0.718941	0.042188	-0.231851	-0.678506	-0.30844	-0.526387	-0.302922	-1.09002	-0.200695	7
MAFA_extended (239g)	2.09056	2.221	-0.286678	-0.0547112	-0.595962	1.18291	-1.02453	-0.44975	-0.558298	1.11264	0.311393	-0.270038	-0.827741	-0.831516	-0.567036	0.0182336	-0.965464	-0.505015	5
FOSL1 (416g)	2.12637	1.68495	0.268127	-0.274306	-0.505251	2.09786	-1.21953	-0.139051	-0.626149	0.683267	-0.166043	-0.251073	-0.764564	-0.606932	-0.357367	-0.588144	-0.794299	-0.567864	7
CHD1_extended (11g)	2.13496	1.20966	0.386489	-0.345925	-0.444903	1.66561	-1.99696	-0.421538	-0.298355	0.438466	0.541494	0.351747	-1.01895	-0.472246	-0.439779	0.2953	-0.598158	-0.986902	7
FOSL2 (287g)	1.04595	1.4327	0.967163	-0.83236	-0.209823	1.42497	-2.06967	-1.02107	0.100194	0.624537	0.824386	0.980316	-1.13699	-0.380947	-0.874166	0.170765	-0.575627	-0.470319	14
FOXO3 (13g)	1.07882	2.20325	-0.504779	-0.70537	-0.69992	0.540503	-1.45897	-0.304295	0.0294117	1.18811	1.32453	0.0169756	-0.56084	-0.581395	-0.996436	0.845988	-1.29771	-0.11788	7
HIF1A (322g)	1.78624	2.13558	-0.276665	-0.37101	-0.643708	0.606056	-1.46701	-0.742887	-0.00556167	1.20664	1.0508	0.0160128	-0.367184	-0.728192	-0.746806	-0.130463	-1.32231	0.000468126	7
RCOR1_extended (803g)	1.4465	2.07639	-0.0595829	-0.468582	-0.392246	0.986811	-1.69441	-0.521368	-0.153062	1.23047	0.870222	0.281339	-1.19146	-0.859167	-0.365845	0.314229	-1.07648	-0.423749	7
GMEB2 (390g)	1.54872	1.77678	0.424852	-0.494168	-0.299111	0.552508	-1.73395	-1.01125	-0.0954736	1.32337	0.948126	0.501413	-0.93082	-1.09106	-0.934033	0.50821	-0.455766	-0.538354	7
PHF8 (891g)	1.69624	0.584895	-0.186948	-0.178964	-0.120186	-0.125446	-1.82717	-0.345316	-0.128909	0.532874	0.704156	0.130223	-1.44134	-0.64114	1.07007	1.9853	-0.419322	-1.28901	1
ARNTL (60g)	1.17123	0.256092	-0.668983	0.0737799	0.343367	0.480957	-1.04507	-0.73002	-0.67299	0.158701	0.563365	-0.35609	-0.733152	-0.623373	1.20322	2.73617	-1.19234	-0.964851	1
ELF2 (10g)	1.58451	0.735871	-0.347259	-0.525274	-0.284053	0.656727	-1.2322	-0.546759	-0.557695	1.11818	0.812616	0.127005	-0.719803	-0.709833	-0.074646	2.28969	-1.10717	-1.21991	1
EP300 (732g)	2.11304	1.34574	-0.774132	-0.185442	-0.614077	0.591253	-1.47233	-0.152164	-0.491903	0.99573	0.667247	-0.469671	-0.758064	-0.664592	0.793357	1.17172	-1.21939	-0.876324	5
KDM5A (319g)	2.46669	1.31147	-0.597128	-0.376624	-0.48232	0.235318	-1.51916	-0.2225	-0.162167	0.859279	0.644006	-0.235052	-0.799116	-0.746136	0.580587	1.08957	-0.984781	-1.06194	5
KLF13 (15g)	0.0392573	0.582623	-0.789062	-0.0192529	-0.240371	2.36402	-0.804058	-0.506011	-0.804349	1.41133	0.363916	-0.738204	-0.849968	-0.661578	0.687417	1.71608	-1.04751	-0.704282	1
NR2C2 (79g)	1.02457	1.11242	-0.639341	-0.207558	-0.121822	0.983784	-1.39267	-0.213931	-0.309713	0.972083	0.743762	-0.484552	-1.32418	-0.856486	0.553636	2.15294	-1.15394	-0.838989	1
FOXK1 (41g)	-0.049281	0.534532	-0.0410523	-0.0679334	0.364403	1.40935	-1.93131	1.61624	0.504499	0.892187	0.345044	-0.682666	-1.7514	-0.403977	0.311103	1.0424	-1.10175	-0.990378	10
SOX15_extended (14g)	-0.0717121	0.596203	-0.412958	-0.146241	0.0178709	0.460068	-0.776527	0.130865	-0.92017	0.780717	0.449733	-0.477333	-0.855638	-0.821348	0.587486	3.22705	-0.871255	-0.896807	1
RARG (86g)	1.1054	1.76334	0.844653	-0.185519	-0.138819	0.822535	-1.44833	-0.548587	-0.558664	1.09718	0.380468	1.05241	-1.62468	-1.1464	-0.745167	0.512413	-0.0490223	-1.13321	7
KLF3 (692g)	0.26467	0.826401	0.185959	-0.542336	-0.221806	0.438913	-1.35592	-0.852993	-0.805058	0.914492	0.961893	0.378707	-0.637473	-0.675894	-0.0866306	2.876	-0.728269	-0.940649	1
RARA (209g)	1.38787	1.56475	-0.0294025	-0.28646	-0.568872	0.834202	-1.31561	-0.752904	-0.441391	1.14359	0.602325	0.0910828	-1.08234	-0.996746	-0.23457	1.87415	-0.800915	-0.988765	7
SP3 (367g)	1.98109	1.71899	-0.215398	-0.275633	-0.48862	0.476942	-1.47198	-0.738934	-0.256055	0.929041	0.936614	0.291533	-1.14491	-0.808792	-0.375887	1.16011	-0.863617	-0.854498	7
MEF2D (16g)	1.47115	1.67847	-0.168058	-0.0477538	-0.394047	0.768267	-1.38944	-0.96911	-0.379355	1.19492	1.10101	0.217052	-1.27897	-0.92671	-0.710349	1.22547	-0.884785	-0.507776	7
HCFC1 (1155g)	1.41877	2.00224	-0.604718	-0.402185	-0.253271	0.263892	-1.37616	-0.801585	-0.525397	1.4142	1.19747	-0.0946876	-0.864837	-1.24195	-0.0990883	1.06233	-0.67673	-0.418293	7
RELA (620g)	1.66795	2.20645	-0.189829	-0.590063	-0.111637	-0.0161926	-1.24158	-0.863411	-0.588379	1.27762	1.13724	0.0855231	-0.743513	-1.18878	-0.254064	0.635401	-0.931217	-0.29152	7
ELK3_extended (202g)	2.00279	2.09994	-0.409322	0.118838	-0.46932	0.551157	-1.28592	-0.458282	-0.19792	1.26942	0.589063	-0.15018	-1.262	-1.09134	0.12449	0.0150387	-0.991628	-0.454831	5
CUX1_extended (1229g)	2.43412	1.6167	-0.304355	-0.21408	-0.542372	0.228916	-1.42527	-0.530285	-0.133002	1.08379	0.753477	-0.164474	-0.798384	-0.897357	-0.0145057	0.781125	-1.12083	-0.753215	5
TFDP1 (1265g)	2.44406	1.93221	-0.528949	0.0194688	-0.556208	0.195834	-1.08792	-0.608936	-0.613439	1.187	0.738339	-0.236041	-0.905446	-1.18343	-0.340329	0.105623	0.0504615	-0.61228	5
MNT_extended (92g)	0.755892	1.21483	-0.814486	-0.366798	-0.528815	1.29351	-0.970818	-0.802023	-0.961713	1.20101	1.06527	-0.534609	-0.313198	-0.810282	0.277667	2.06964	-1.15006	-0.625015	1
BACH1_extended (23g)	0.968401	1.66116	-0.492873	-0.146952	-0.273293	1.44434	-1.02571	-0.686486	-0.983757	1.04029	0.889076	-0.789247	-0.543733	-0.867135	0.606488	1.39402	-1.34621	-0.848377	1
ZBTB7B (49g)	1.93595	0.658029	-0.550633	0.392424	-0.393635	0.151886	-0.72054	-0.683312	-0.853565	0.639762	0.384893	-0.473093	-0.833111	-0.857336	0.525101	2.50885	-0.840689	-0.990981	1
SRF_extended (722g)	2.49754	1.63013	-0.656541	-0.112283	-0.592525	0.569251	-0.706355	-0.556863	-0.575045	1.08625	0.467334	-0.761248	-0.0800998	-1.02598	0.050057	0.795327	-1.25549	-0.773462	5
RXRA (274g)	1.9635	1.51821	-0.778806	0.152077	-0.559007	0.471622	-0.4832	-0.754871	-0.932653	1.06748	0.625234	-0.753553	-0.350902	-0.97808	0.17161	1.6442	-1.16162	-0.861242	1
STAT6 (53g)	1.81139	1.38135	-0.963752	0.078683	-0.450464	0.558334	-0.543169	-0.559309	-1.02186	0.976363	0.714945	-0.782429	-0.277425	-1.034	0.736235	1.57825	-1.21653	-0.986615	1
ELF4 (1305g)	1.86973	1.50468	-0.772519	-0.0289879	-0.411586	0.125827	-0.63899	-0.8158	-0.884614	1.20362	0.806607	-0.591633	-0.240499	-1.14502	0.302566	1.64934	-1.19329	-0.739425	1
SREBF2 (405g)	2.11101	1.87235	-0.580084	0.150329	-0.214335	0.723365	-0.896994	-0.649453	-0.825222	1.1149	0.562128	-0.410662	-0.949627	-1.13273	-0.138768	0.933008	-0.893288	-0.775929	5
ZBTB7A (156g)	1.26429	1.62606	-0.606048	-0.229908	-0.525973	1.20696	-0.920418	-0.674581	-0.935513	1.41211	0.70557	-0.475069	-0.580092	-0.985598	-0.0301586	1.58564	-1.23335	-0.60393	1
